# Supplementary material for: Genetic Variation in the Social Environment Contributes to Health and Disease
Source: PLoS Genet. 2017 Jan 25;13(1):e1006498. doi: 10.1371/journal.pgen.1006498 (PMC5266220; doi:10.1371/journal.pgen.1006498)
Supplement: S6 Table — (XLSX) [file pgen.1006498.s019.xlsx]

## Sheet: new_PAPER_filled_outbreds_table
Supplementary Table 6 SGE significance and effect sizes for all genes expressed in the hippocampus (outbred mice dataset). Q value: see Methods. STE: standard error.
Probeset	MGI gene symbol	Ensembl gene ID	Description	Sample size	SGE P value	SGE Q value	Contribution of SGE to phenotypic variance +/- STE	Contribution of DGE to phenotypic variance +/- STE
scl0001602.1_506	Wtap	ENSMUSG00000060475	Wilms tumour 1-associating protein	459	4.1e-05	0.64	21 +/- 11	5 +/- 8
scl41407.7.1_106	Myh8	ENSMUSG00000055775	myosin, heavy polypeptide 8, skeletal muscle, perinatal	459	0.00036	1	30 +/- 13	0 +/- 9
scl023885.1_23	Gmcl1	ENSMUSG00000001157	germ cell-less homolog 1 (Drosophila)	459	0.00089	1	42 +/- 13	30 +/- 12
scl0002235.1_6	Hdhd2	ENSMUSG00000025421	haloacid dehalogenase-like hydrolase domain containing 2	459	0.00097	1	41 +/- 14	34 +/- 12
scl51579.1.1_134	AK019921	NA	NA	459	0.0011	1	11 +/- 10	12 +/- 9
scl0002449.1_77	Skp2	ENSMUSG00000054115	S-phase kinase-associated protein 2 (p45)	459	0.0015	1	37 +/- 12	43 +/- 13
scl53441.6.1_144	Aip	ENSMUSG00000024847	aryl-hydrocarbon receptor-interacting protein	459	0.0015	1	13 +/- 11	7 +/- 9
scl013885.9_29	Esd	ENSMUSG00000021996	esterase D/formylglutathione hydrolase	459	0.0016	1	10 +/- 8	90 +/- 11
scl41866.19_12	Aebp1	ENSMUSG00000020473	AE binding protein 1	459	0.0023	1	38 +/- 13	33 +/- 12
scl33996.15_314	Slc20a2	ENSMUSG00000037656	solute carrier family 20, member 2	459	0.0024	1	17 +/- 10	43 +/- 12
scl028077.4_283	Med10	ENSMUSG00000021598	mediator complex subunit 10	459	0.0035	1	22 +/- 11	34 +/- 13
scl28683.3_131	Chchd4	ENSMUSG00000034203	coiled-coil-helix-coiled-coil-helix domain containing 4	459	0.004	1	6 +/- 7	108 +/- 9
scl31678.22.1_32	Sfrs16	NA	NA	459	0.0042	1	20 +/- 9	102 +/- 10
scl30469.7_1	Igf2	ENSMUSG00000048583	insulin-like growth factor 2	459	0.0043	1	19 +/- 10	39 +/- 13
scl32600.10_229	Gabrb3	ENSMUSG00000033676	gamma-aminobutyric acid (GABA) A receptor, subunit beta 3	459	0.0048	1	27 +/- 13	11 +/- 11
scl48262.5_262	Rwdd2b	ENSMUSG00000041079	RWD domain containing 2B	459	0.0054	1	26 +/- 12	18 +/- 12
scl0013589.1_127	Mapre1	ENSMUSG00000027479	microtubule-associated protein, RP/EB family, member 1	459	0.0055	1	18 +/- 11	13 +/- 9
scl0110521.5_186	Hivep1	ENSMUSG00000021366	human immunodeficiency virus type I enhancer binding protein 1	459	0.0058	1	21 +/- 11	33 +/- 13
scl011807.2_4	Apoa2	ENSMUSG00000005681	apolipoprotein A-II	459	0.0061	1	26 +/- 13	6 +/- 10
scl0320368.1_79	AK078153	NA	NA	459	0.0064	1	24 +/- 12	30 +/- 10
scl24283.53_124	AI314180	ENSMUSG00000050812	expressed sequence AI314180	459	0.0064	1	21 +/- 11	45 +/- 13
scl0001013.1_0	Bcl2	ENSMUSG00000057329	B cell leukemia/lymphoma 2	459	0.0066	1	16 +/- 11	33 +/- 13
scl069533.1_324	Krtap26-1	ENSMUSG00000071471	keratin associated protein 26-1	459	0.0066	1	40 +/- 13	24 +/- 12
scl27967.7.1_149	Abhd1	ENSMUSG00000006638	abhydrolase domain containing 1	459	0.0066	1	4 +/- 6	105 +/- 9
ri|0610040O15|R000004D20|AK018753|84	AK018753	NA	NA	459	0.0067	1	10 +/- 10	15 +/- 8
scl000547.1_50	Nt5c2	ENSMUSG00000025041	5'-nucleotidase, cytosolic II	459	0.007	1	25 +/- 11	32 +/- 13
scl0057296.1_256	Psmd8	ENSMUSG00000030591	proteasome (prosome, macropain) 26S subunit, non-ATPase, 8	459	0.0071	1	24 +/- 12	2 +/- 8
scl16776.7.1_45	Inpp1	ENSMUSG00000026102	inositol polyphosphate-1-phosphatase	459	0.0073	1	14 +/- 10	44 +/- 13
scl38332.1_14	AK078153	NA	NA	459	0.0074	1	16 +/- 11	21 +/- 9
scl42739.19.1_0	Klc1	ENSMUSG00000021288	kinesin light chain 1	459	0.0075	1	15 +/- 10	75 +/- 12
scl29419.1_304	H2afj	ENSMUSG00000060032	H2A histone family, member J	459	0.0077	1	10 +/- 11	10 +/- 9
scl0003294.1_25	Mrg1	NA	NA	459	0.0078	1	11 +/- 10	45 +/- 13
scl23784.13_65	Rbbp4	ENSMUSG00000057236	retinoblastoma binding protein 4	459	0.0082	1	11 +/- 11	2 +/- 9
ri|A630056H20|PX00147A21|AK042081|2632	Pde4dip	ENSMUSG00000038170	phosphodiesterase 4D interacting protein (myomegalin)	459	0.0083	1	28 +/- 13	13 +/- 11
scl35001.15_103	Plekha2	ENSMUSG00000031557	pleckstrin homology domain-containing, family A (phosphoinositide binding specific) member 2	459	0.0085	1	32 +/- 12	35 +/- 13
scl27026.11.1_112	Slc29a4	ENSMUSG00000050822	solute carrier family 29 (nucleoside transporters), member 4	459	0.0086	1	29 +/- 11	42 +/- 13
scl0002797.1_1131	Fktn	ENSMUSG00000028414	fukutin	459	0.0094	1	19 +/- 12	4 +/- 10
scl0002786.1_3	Capzb	ENSMUSG00000028745	capping protein (actin filament) muscle Z-line, beta	459	0.0097	1	13 +/- 10	52 +/- 13
scl00347722.2_310	Agap1	ENSMUSG00000055013	ArfGAP with GTPase domain, ankyrin repeat and PH domain 1	459	0.0099	1	33 +/- 13	21 +/- 11
scl53739.1.1_59	AK034248	NA	NA	459	0.01	1	23 +/- 11	34 +/- 12
scl34651.5_177	9130011J15Rik	NA	NA	459	0.011	1	15 +/- 10	39 +/- 13
ri|5330429B06|PX00054C12|AK030538|3372	Vti1a	ENSMUSG00000024983	vesicle transport through interaction with t-SNAREs 1A	459	0.011	1	21 +/- 12	0 +/- 9
scl19226.19.3_22	Rbms1	ENSMUSG00000026970	RNA binding motif, single stranded interacting protein 1	459	0.011	1	22 +/- 11	35 +/- 13
scl24613.3.1_107	AK011879	NA	NA	459	0.011	1	10 +/- 11	8 +/- 9
ri|4732422E11|PX00050F15|AK028641|2872	Syne1	ENSMUSG00000096054	spectrin repeat containing, nuclear envelope 1	459	0.012	1	25 +/- 12	62 +/- 13
scl0003623.1_49	Pfkp	ENSMUSG00000021196	phosphofructokinase, platelet	459	0.012	1	17 +/- 10	55 +/- 13
ri|2210407N10|ZX00054I10|AK008848|501	2610030H06Rik	NA	NA	459	0.012	1	33 +/- 13	18 +/- 11
scl000743.1_41	Wwp2	ENSMUSG00000031930	WW domain containing E3 ubiquitin protein ligase 2	459	0.012	1	25 +/- 12	25 +/- 12
scl0071599.2_256	Senp8	ENSMUSG00000051705	SUMO/sentrin specific peptidase 8	459	0.012	1	30 +/- 13	5 +/- 10
scl22587.5_47	Tacr3	ENSMUSG00000028172	tachykinin receptor 3	459	0.012	1	21 +/- 11	25 +/- 12
scl0002343.1_498	Dgkb	ENSMUSG00000036095	diacylglycerol kinase, beta	459	0.013	1	20 +/- 11	42 +/- 13
scl0003903.1_2	Tmpo	ENSMUSG00000019961	thymopoietin	459	0.013	1	15 +/- 12	0 +/- 9
scl066412.2_22	Arrdc4	ENSMUSG00000042659	arrestin domain containing 4	459	0.013	1	27 +/- 13	11 +/- 10
scl0076022.1_281	Gon4l	ENSMUSG00000054199	gon-4-like (C.elegans)	459	0.014	1	5 +/- 8	75 +/- 12
scl056334.4_3	Tmed2	ENSMUSG00000029390	transmembrane emp24 domain trafficking protein 2	459	0.014	1	26 +/- 12	29 +/- 12
scl012289.1_31	Cacna1d	ENSMUSG00000015968	calcium channel, voltage-dependent, L type, alpha 1D subunit	459	0.014	1	32 +/- 13	19 +/- 11
scl17222.1.1_303	Refbp2	NA	NA	459	0.014	1	22 +/- 11	35 +/- 13
scl25615.2_115	1110007M04Rik	NA	NA	459	0.014	1	30 +/- 13	9 +/- 10
scl34212.8_211	AK082503	NA	NA	459	0.015	1	11 +/- 10	48 +/- 13
scl0073251.1_49	Setd7	ENSMUSG00000037111	SET domain containing (lysine methyltransferase) 7	459	0.015	1	23 +/- 11	32 +/- 13
scl22906.13_309	Tdrkh	ENSMUSG00000041912	tudor and KH domain containing protein	459	0.015	1	10 +/- 9	50 +/- 13
scl26670.3.10_104	Msx1	ENSMUSG00000048450	msh homeobox 1	459	0.016	1	16 +/- 10	34 +/- 13
scl0003398.1_59	Parp6	ENSMUSG00000025237	poly (ADP-ribose) polymerase family, member 6	459	0.016	1	21 +/- 11	28 +/- 12
scl28733.12.1_10	Arhgap25	ENSMUSG00000030047	Rho GTPase activating protein 25	459	0.016	1	28 +/- 12	27 +/- 12
scl34022.8_400	Agpat5	ENSMUSG00000031467	1-acylglycerol-3-phosphate O-acyltransferase 5 (lysophosphatidic acid acyltransferase, epsilon)	459	0.018	1	4 +/- 7	96 +/- 10
scl27946.19.1_69	Bre	ENSMUSG00000052139	brain and reproductive organ-expressed protein	459	0.018	1	30 +/- 12	27 +/- 12
scl37789.23.1_65	Pcbp3	ENSMUSG00000001120	poly(rC) binding protein 3	459	0.018	1	23 +/- 11	23 +/- 12
scl013629.6_24	Eef2	ENSMUSG00000034994	eukaryotic translation elongation factor 2	459	0.018	1	26 +/- 12	22 +/- 12
scl0381695.1_64	BC037393	NA	NA	459	0.018	1	21 +/- 12	4 +/- 10
scl000779.1_49	Lancl1	ENSMUSG00000026000	LanC (bacterial lantibiotic synthetase component C)-like 1	459	0.019	1	5 +/- 8	84 +/- 11
scl0003070.1_323	Hnrnpa3	ENSMUSG00000059005	heterogeneous nuclear ribonucleoprotein A3	459	0.019	1	7 +/- 9	31 +/- 10
scl20334.2_166	Gabpb1	ENSMUSG00000027361	GA repeat binding protein, beta 1	459	0.019	1	9 +/- 10	51 +/- 13
scl0001724.1_23	Noxo1	ENSMUSG00000019320	NADPH oxidase organizer 1	459	0.019	1	29 +/- 12	34 +/- 13
scl055936.21_139	Ctps2	ENSMUSG00000031360	cytidine 5'-triphosphate synthase 2	459	0.019	1	19 +/- 11	35 +/- 13
scl43487.1.19_98	Hspb3	ENSMUSG00000051456	heat shock protein 3	459	0.019	1	27 +/- 13	20 +/- 12
scl00228564.2_1	Frmd5	ENSMUSG00000027238	FERM domain containing 5	459	0.02	1	9 +/- 9	48 +/- 13
scl0320129.2_60	Adrbk2	ENSMUSG00000042249	adrenergic receptor kinase, beta 2	459	0.02	1	20 +/- 10	33 +/- 13
scl0002845.1_3	Capzb	ENSMUSG00000028745	capping protein (actin filament) muscle Z-line, beta	459	0.02	1	23 +/- 11	35 +/- 13
scl16639.44.189_5	Fn1	ENSMUSG00000026193	fibronectin 1	459	0.02	1	16 +/- 10	30 +/- 13
scl0078701.1_146	Jakmip1	ENSMUSG00000063646	janus kinase and microtubule interacting protein 1	459	0.02	1	22 +/- 11	31 +/- 13
scl40763.6_142	Kcnj16	ENSMUSG00000051497	potassium inwardly-rectifying channel, subfamily J, member 16	459	0.021	1	15 +/- 11	9 +/- 9
scl45065.22.7_66	Heatr1	ENSMUSG00000050244	HEAT repeat containing 1	459	0.021	1	23 +/- 12	33 +/- 12
scl0002228.1_80	Rnf138	ENSMUSG00000024317	ring finger protein 138	459	0.021	1	12 +/- 10	37 +/- 13
scl078121.4_47	AK141303	NA	NA	459	0.021	1	23 +/- 11	22 +/- 12
scl32625.5.9_17	Nell1	ENSMUSG00000055409	NEL-like 1	459	0.021	1	19 +/- 12	2 +/- 9
scl072071.1_169	AK008571	NA	NA	459	0.021	1	7 +/- 10	12 +/- 10
scl072488.1_25	AK011885	NA	NA	459	0.022	1	8 +/- 10	19 +/- 10
scl0017258.2_124	Mef2a	ENSMUSG00000030557	myocyte enhancer factor 2A	459	0.022	1	12 +/- 10	28 +/- 12
ri|B130044B09|PX00158G09|AK045183|1693	Mule	NA	NA	459	0.022	1	23 +/- 11	34 +/- 12
scl0066459.2_45	Pigy	NA	NA	459	0.022	1	35 +/- 13	10 +/- 10
scl00237711.2_170	C230094A16Rik	NA	NA	459	0.022	1	8 +/- 9	66 +/- 12
scl019130.1_4	Prox1	ENSMUSG00000010175	prospero homeobox 1	459	0.023	1	30 +/- 12	25 +/- 12
scl30491.4.1_1	B230206H07Rik	ENSMUSG00000086844	RIKEN cDNA B230206H07 gene	459	0.023	1	23 +/- 12	14 +/- 11
scl42706.1.1_221	AK009987	NA	NA	459	0.024	1	9 +/- 7	100 +/- 9
scl0208518.1_281	Cep78	ENSMUSG00000041491	centrosomal protein 78	459	0.024	1	7 +/- 10	18 +/- 9
scl52274.9_385	Rab18	ENSMUSG00000073639	RAB18, member RAS oncogene family	459	0.024	1	18 +/- 11	31 +/- 10
scl00110524.2_181	Dgkq	ENSMUSG00000004815	diacylglycerol kinase, theta	459	0.024	1	20 +/- 12	1 +/- 9
scl0001777.1_1	Epha3	ENSMUSG00000052504	Eph receptor A3	459	0.024	1	23 +/- 12	13 +/- 11
scl38416.13.1_1	Ptprb	ENSMUSG00000020154	protein tyrosine phosphatase, receptor type, B	459	0.025	1	12 +/- 10	43 +/- 13
scl46594.4.369_22	AK012965	NA	NA	459	0.025	1	27 +/- 12	22 +/- 12
scl000164.1_13	Sae1	ENSMUSG00000052833	SUMO1 activating enzyme subunit 1	459	0.026	1	22 +/- 11	30 +/- 12
scl33398.3_321	Pskh1	ENSMUSG00000048310	protein serine kinase H1	459	0.026	1	19 +/- 11	32 +/- 12
ri|F830009M01|PL00016F22|AK089706|1039	Rbbp4	ENSMUSG00000057236	retinoblastoma binding protein 4	459	0.027	1	15 +/- 11	35 +/- 11
scl0277414.7_122	Trp53i11	ENSMUSG00000068735	transformation related protein 53 inducible protein 11	459	0.027	1	28 +/- 12	22 +/- 12
ri|A730096A03|PX00153B19|AK043442|883	AK043442	NA	NA	459	0.027	1	24 +/- 12	17 +/- 11
scl014313.3_29	Fst	ENSMUSG00000021765	follistatin	459	0.028	1	16 +/- 11	24 +/- 12
scl00229211.2_16	Acad9	ENSMUSG00000027710	acyl-Coenzyme A dehydrogenase family, member 9	459	0.029	1	23 +/- 12	47 +/- 13
scl43428.43_108	Itsn2	ENSMUSG00000020640	intersectin 2	459	0.029	1	9 +/- 11	3 +/- 9
scl45788.19.56_41	Ccdc66	ENSMUSG00000046753	coiled-coil domain containing 66	459	0.029	1	17 +/- 10	34 +/- 13
scl55047.8.1_1	Sytl5	ENSMUSG00000054453	synaptotagmin-like 5	459	0.029	1	19 +/- 11	28 +/- 12
scl069606.1_13	Mtfmt	ENSMUSG00000059183	mitochondrial methionyl-tRNA formyltransferase	459	0.029	1	10 +/- 11	10 +/- 10
scl32695.9.13_0	Nosip	ENSMUSG00000003421	nitric oxide synthase interacting protein	459	0.029	1	17 +/- 12	0 +/- 9
scl27092.3.1_116	2010007H12Rik	NA	NA	459	0.03	1	19 +/- 12	1 +/- 9
scl0071793.2_161	Ints12	ENSMUSG00000028016	integrator complex subunit 12	459	0.031	1	18 +/- 11	28 +/- 12
scl0383295.3_18	Ypel5	ENSMUSG00000039770	yippee-like 5 (Drosophila)	459	0.031	1	24 +/- 12	10 +/- 11
scl52754.4_241	0610038F07Rik	NA	NA	459	0.031	1	8 +/- 11	1 +/- 10
scl0066052.1_175	Sdhc	ENSMUSG00000058076	succinate dehydrogenase complex, subunit C, integral membrane protein	459	0.032	1	26 +/- 12	33 +/- 11
scl0319370.3_39	Fam100b	NA	NA	459	0.032	1	20 +/- 11	25 +/- 12
ri|1300006C19|R000011G13|AK018758|2709	Stt3b	ENSMUSG00000032437	STT3, subunit of the oligosaccharyltransferase complex, homolog B (S. cerevisiae)	459	0.032	1	21 +/- 11	32 +/- 12
scl0269346.15_4	Slc28a2	ENSMUSG00000027219	solute carrier family 28 (sodium-coupled nucleoside transporter), member 2	459	0.032	1	21 +/- 11	23 +/- 12
scl22567.17_121	Ppp3ca	ENSMUSG00000028161	protein phosphatase 3, catalytic subunit, alpha isoform	459	0.032	1	22 +/- 12	10 +/- 10
ri|8430408C16|PX00024N13|AK018393|963	Slc15a2	ENSMUSG00000022899	solute carrier family 15 (H+/peptide transporter), member 2	459	0.033	1	5 +/- 7	95 +/- 10
scl16803.9_203	Slc40a1	ENSMUSG00000025993	solute carrier family 40 (iron-regulated transporter), member 1	459	0.033	1	16 +/- 10	35 +/- 12
scl21950.8.1_214	Mtx1	ENSMUSG00000064068	metaxin 1	459	0.033	1	7 +/- 9	45 +/- 13
scl00243813.1_281	Leng9	ENSMUSG00000043432	leukocyte receptor cluster (LRC) member 9	459	0.033	1	19 +/- 12	0 +/- 9
scl0002281.1_5	Tssc1	ENSMUSG00000036613	tumor suppressing subtransferable candidate 1	459	0.033	1	28 +/- 13	14 +/- 11
ri|9130227N12|PX00061B23|AK033707|1811	Irak2	ENSMUSG00000060477	interleukin-1 receptor-associated kinase 2	459	0.034	1	27 +/- 13	8 +/- 10
scl020983.1_6	Syt4	ENSMUSG00000024261	synaptotagmin IV	459	0.034	1	23 +/- 11	37 +/- 13
scl072315.4_71	2310015A05Rik	NA	NA	459	0.034	1	15 +/- 11	4 +/- 10
scl00327744.1_262	E130307A14Rik	ENSMUSG00000087177	RIKEN cDNA E130307A14 gene	459	0.034	1	19 +/- 12	3 +/- 10
scl0027059.2_196	Sh3d19	ENSMUSG00000028082	SH3 domain protein D19	459	0.035	1	10 +/- 10	34 +/- 13
scl0068477.1_272	Rmnd5a	ENSMUSG00000002222	required for meiotic nuclear division 5 homolog A (S. cerevisiae)	459	0.035	1	22 +/- 11	26 +/- 12
scl17872.1_157	Zdbf2	ENSMUSG00000027520	zinc finger, DBF-type containing 2	459	0.035	1	25 +/- 12	23 +/- 12
scl20438.14_20	AK005024	NA	NA	459	0.035	1	4 +/- 8	69 +/- 12
scl0001327.1_163	Trim41	ENSMUSG00000040365	tripartite motif-containing 41	459	0.036	1	10 +/- 9	39 +/- 13
scl021991.1_200	Tpi1	ENSMUSG00000023456	triosephosphate isomerase 1	459	0.036	1	24 +/- 12	15 +/- 11
ri|B230339C08|PX00160E13|AK046059|2051	Idh3b	ENSMUSG00000027406	isocitrate dehydrogenase 3 (NAD+) beta	459	0.036	1	15 +/- 10	24 +/- 12
scl33010.3_528	Six5	ENSMUSG00000040841	sine oculis-related homeobox 5	459	0.036	1	20 +/- 11	19 +/- 12
scl14296.1.1_54	AK004067	NA	NA	459	0.037	1	14 +/- 10	29 +/- 12
ri|9430067P06|PX00110E07|AK034962|2024	Ryr3	ENSMUSG00000057378	ryanodine receptor 3	459	0.037	1	15 +/- 10	27 +/- 13
scl0072949.1_78	Ccnt2	ENSMUSG00000026349	cyclin T2	459	0.037	1	26 +/- 12	22 +/- 12
scl19458.1.58_51	AK043516	NA	NA	459	0.037	1	27 +/- 13	13 +/- 11
scl068957.3_51	Paqr6	ENSMUSG00000041423	progestin and adipoQ receptor family member VI	459	0.037	1	6 +/- 10	14 +/- 10
ri|4930403J22|PX00029H03|AK015064|1037	Tmtc4	ENSMUSG00000041594	transmembrane and tetratricopeptide repeat containing 4	459	0.038	1	21 +/- 11	29 +/- 12
scl27448.20_58	Chfr	ENSMUSG00000014668	checkpoint with forkhead and ring finger domains	459	0.038	1	22 +/- 11	21 +/- 12
GI_34740334	Tuba1b	ENSMUSG00000023004	tubulin, alpha 1B	459	0.038	1	19 +/- 11	31 +/- 13
GI_38085099	Rpl27a	ENSMUSG00000046364	ribosomal protein L27A	459	0.038	1	14 +/- 11	1 +/- 10
scl35747.13.1_171	Thsd4	ENSMUSG00000032289	thrombospondin, type I, domain containing 4	459	0.038	1	9 +/- 11	5 +/- 9
scl14607.1.1_266	Unc80	ENSMUSG00000055567	unc-80 homolog (C. elegans)	459	0.039	1	6 +/- 9	64 +/- 12
scl42454.7.1_176	2700097O09Rik	ENSMUSG00000062198	RIKEN cDNA 2700097O09 gene	459	0.039	1	23 +/- 12	2 +/- 9
scl0004211.1_2	Ptpn12	ENSMUSG00000028771	protein tyrosine phosphatase, non-receptor type 12	459	0.039	1	23 +/- 12	7 +/- 10
scl00224105.1_125	Pak2	ENSMUSG00000022781	p21 protein (Cdc42/Rac)-activated kinase 2	459	0.039	1	26 +/- 12	10 +/- 11
scl32731.3.1_44	Klk1b9	ENSMUSG00000059042	kallikrein 1-related peptidase b9	459	0.039	1	17 +/- 11	24 +/- 12
scl16161.8_304	1700025G04Rik	ENSMUSG00000032666	RIKEN cDNA 1700025G04 gene	459	0.04	1	14 +/- 9	82 +/- 11
scl0058187.1_36	Cldn10	ENSMUSG00000022132	claudin 10	459	0.04	1	4 +/- 8	42 +/- 9
scl021411.7_38	Tcf20	ENSMUSG00000041852	transcription factor 20	459	0.04	1	24 +/- 12	18 +/- 11
scl066939.11_66	2310007F21Rik	NA	NA	459	0.04	1	13 +/- 10	26 +/- 12
scl0234373.9_64	Sfrs14	NA	NA	459	0.04	1	15 +/- 11	39 +/- 13
GI_34365778	Pbx1	ENSMUSG00000052534	pre B cell leukemia homeobox 1	459	0.041	1	19 +/- 11	27 +/- 12
scl23149.3_209	Sucnr1	ENSMUSG00000027762	succinate receptor 1	459	0.041	1	22 +/- 11	23 +/- 12
ri|D130007C19|PX00182M12|AK051152|1514	AK051152	NA	NA	459	0.042	1	9 +/- 9	65 +/- 13
scl35894.9.1_18	Htr3a	ENSMUSG00000032269	5-hydroxytryptamine (serotonin) receptor 3A	459	0.042	1	10 +/- 10	37 +/- 13
scl072190.1_208	2510009E07Rik	ENSMUSG00000043391	RIKEN cDNA 2510009E07 gene	459	0.042	1	31 +/- 13	30 +/- 12
scl38103.23_32	L3mbtl3	ENSMUSG00000039089	l(3)mbt-like 3 (Drosophila)	459	0.042	1	15 +/- 10	23 +/- 12
scl53403.26.13_76	Bscl2	ENSMUSG00000071657	Berardinelli-Seip congenital lipodystrophy 2 homolog (seipin)	459	0.042	1	20 +/- 12	13 +/- 11
scl54834.6_26	Gdi1	ENSMUSG00000015291	guanosine diphosphate (GDP) dissociation inhibitor 1	459	0.043	1	21 +/- 11	25 +/- 12
scl0380967.6_277	Tmem106c	ENSMUSG00000052369	transmembrane protein 106C	459	0.043	1	8 +/- 11	8 +/- 10
scl0003233.1_11	Epb4.1l1	ENSMUSG00000027624	erythrocyte protein band 4.1 like 1	459	0.044	1	13 +/- 9	81 +/- 12
scl21750.9_632	Slc22a15	ENSMUSG00000033147	solute carrier family 22 (organic anion/cation transporter), member 15	459	0.044	1	29 +/- 13	43 +/- 12
scl1664.1.1_301	Adcyap1r1	ENSMUSG00000029778	adenylate cyclase activating polypeptide 1 receptor 1	459	0.044	1	21 +/- 11	42 +/- 13
scl000169.1_78	Shyc	NA	NA	459	0.044	1	12 +/- 10	30 +/- 12
scl4115.1.1_51	Adra1d	ENSMUSG00000027335	adrenergic receptor, alpha 1d	459	0.044	1	9 +/- 9	38 +/- 13
scl0054004.2_173	Diap2	ENSMUSG00000034480	diaphanous homolog 2 (Drosophila)	459	0.044	1	18 +/- 11	27 +/- 12
scl37812.5_586	Gstt3	ENSMUSG00000001665	glutathione S-transferase, theta 3	459	0.044	1	13 +/- 10	34 +/- 13
scl21283.8.1_14	Il15ra	ENSMUSG00000023206	interleukin 15 receptor, alpha chain	459	0.045	1	17 +/- 10	31 +/- 13
scl0320870.1_45	AK054307	NA	NA	459	0.045	1	21 +/- 11	27 +/- 12
scl30462.6_23	R74862	ENSMUSG00000059277	expressed sequence R74862	459	0.045	1	19 +/- 12	6 +/- 10
scl0060365.1_251	Rbm8a	ENSMUSG00000038374	RNA binding motif protein 8a	459	0.045	1	21 +/- 12	38 +/- 12
GI_38079650	Gm1673	ENSMUSG00000070858	predicted gene 1673	459	0.045	1	28 +/- 13	12 +/- 11
scl16816.7.1_32	Fhl2	ENSMUSG00000008136	four and a half LIM domains 2	459	0.046	1	17 +/- 11	49 +/- 12
scl47773.2.2273_294	AK043153	NA	NA	459	0.046	1	6 +/- 9	62 +/- 13
scl44416.3_31	2810008M24Rik	NA	NA	459	0.046	1	28 +/- 12	24 +/- 12
scl47377.1_418	AK045038	NA	NA	459	0.046	1	22 +/- 12	9 +/- 11
scl011489.1_320	Adam12	ENSMUSG00000054555	a disintegrin and metallopeptidase domain 12 (meltrin alpha)	459	0.046	1	20 +/- 11	22 +/- 12
scl600.1.1_68	Olfr165	ENSMUSG00000050158	olfactory receptor 165	459	0.046	1	23 +/- 11	20 +/- 12
ri|E130309L16|PX00208H04|AK053808|811	Atp5a1	ENSMUSG00000025428	ATP synthase, H+ transporting, mitochondrial F1 complex, alpha subunit 1	459	0.046	1	13 +/- 11	0 +/- 9
scl42861.16_141	Slc24a4	ENSMUSG00000041771	solute carrier family 24 (sodium/potassium/calcium exchanger), member 4	459	0.047	1	16 +/- 11	19 +/- 11
scl0225995.2_210	D030056L22Rik	ENSMUSG00000047044	RIKEN cDNA D030056L22 gene	459	0.047	1	28 +/- 13	9 +/- 10
GI_38073651	Rpl29	ENSMUSG00000048758	ribosomal protein L29	459	0.048	1	29 +/- 13	52 +/- 12
ri|B130066D09|PX00158L11|AK045339|969	Ccdc15	ENSMUSG00000034303	coiled-coil domain containing 15	459	0.048	1	33 +/- 13	16 +/- 11
scl069211.2_10	2310081J21Rik	NA	NA	459	0.048	1	26 +/- 12	19 +/- 11
GI_20952776	Fam60a	ENSMUSG00000039985	family with sequence similarity 60, member A	459	0.048	1	25 +/- 12	15 +/- 11
scl7395.1.1_48	AK017009	NA	NA	459	0.048	1	16 +/- 11	21 +/- 12
scl0018045.2_49	Nfyb	ENSMUSG00000020248	nuclear transcription factor-Y beta	459	0.05	1	29 +/- 13	6 +/- 10
scl00108138.1_7	Xrcc4	ENSMUSG00000021615	X-ray repair complementing defective repair in Chinese hamster cells 4	459	0.05	1	23 +/- 12	21 +/- 12
scl019219.1_12	Ptger4	ENSMUSG00000039942	prostaglandin E receptor 4 (subtype EP4)	459	0.05	1	14 +/- 10	25 +/- 12
scl0320831.1_209	Atp2b1	ENSMUSG00000019943	ATPase, Ca++ transporting, plasma membrane 1	459	0.05	1	25 +/- 13	5 +/- 10
ri|A230057M07|PX00128B17|AK038731|3080	AK038731	NA	NA	459	0.051	1	16 +/- 11	39 +/- 13
scl41598.17.1_21	Clk4	ENSMUSG00000020385	CDC like kinase 4	459	0.051	1	23 +/- 12	5 +/- 9
scl00243819.2_7	Saps1	NA	NA	459	0.051	1	24 +/- 12	9 +/- 11
scl0054711.1_45	Plagl2	ENSMUSG00000051413	pleiomorphic adenoma gene-like 2	459	0.051	1	16 +/- 10	28 +/- 12
scl0003480.1_157	Usp2	ENSMUSG00000032010	ubiquitin specific peptidase 2	459	0.052	1	19 +/- 11	32 +/- 12
ri|2210410D02|ZX00054I09|AK008881|777	1810034K20Rik	NA	NA	459	0.052	1	13 +/- 10	27 +/- 12
scl34728.6_247	AI449175	NA	NA	459	0.052	1	12 +/- 11	3 +/- 9
scl42817.2_70	BC078436	NA	NA	459	0.053	1	14 +/- 10	31 +/- 13
scl42283.2.1_9	AK010109	NA	NA	459	0.053	1	15 +/- 11	7 +/- 11
scl0320291.1_30	AK046597	NA	NA	459	0.053	1	19 +/- 12	7 +/- 10
scl53774.1.166_23	Kcne1l	ENSMUSG00000090122	potassium voltage-gated channel, Isk-related family, member 1-like, pseudogene	459	0.054	1	12 +/- 10	28 +/- 12
scl0002542.1_41	Poldip3	ENSMUSG00000041815	polymerase (DNA-directed), delta interacting protein 3	459	0.054	1	23 +/- 11	21 +/- 12
scl52451.21_19	Chuk	ENSMUSG00000025199	conserved helix-loop-helix ubiquitous kinase	459	0.054	1	23 +/- 12	21 +/- 12
scl45682.5.1_217	Dydc2	ENSMUSG00000021791	DPY30 domain containing 2	459	0.055	1	4 +/- 9	59 +/- 12
scl47392.22_290	Rai14	ENSMUSG00000022246	retinoic acid induced 14	459	0.055	1	19 +/- 12	21 +/- 12
scl42555.3_391	Gpr22	ENSMUSG00000044067	G protein-coupled receptor 22	459	0.055	1	10 +/- 10	28 +/- 12
scl0001905.1_3	App	ENSMUSG00000022892	amyloid beta (A4) precursor protein	459	0.055	1	17 +/- 11	26 +/- 12
scl15751.8_2	Sertad4	ENSMUSG00000016262	SERTA domain containing 4	459	0.055	1	25 +/- 12	16 +/- 11
scl0013385.2_175	Dlg4	ENSMUSG00000020886	discs, large homolog 4 (Drosophila)	459	0.055	1	21 +/- 12	49 +/- 12
scl0106389.1_41	Eaf2	ENSMUSG00000022838	ELL associated factor 2	459	0.056	1	14 +/- 11	21 +/- 12
ri|6430407D20|PX00044M14|AK018273|1697	Ubxn2b	ENSMUSG00000028243	UBX domain protein 2B	459	0.057	1	22 +/- 12	27 +/- 12
GI_38081359	Adap1	ENSMUSG00000056413	ArfGAP with dual PH domains 1	459	0.057	1	17 +/- 11	34 +/- 12
scl33440.8_211	Cmtm3	ENSMUSG00000031875	CKLF-like MARVEL transmembrane domain containing 3	459	0.057	1	19 +/- 11	34 +/- 13
scl0002478.1_16	Pop1	ENSMUSG00000022325	processing of precursor 1, ribonuclease P/MRP family, (S. cerevisiae)	459	0.057	1	16 +/- 11	25 +/- 12
scl0403178.9_106	Plcxd1	ENSMUSG00000064247	phosphatidylinositol-specific phospholipase C, X domain containing 1	459	0.058	1	22 +/- 11	23 +/- 12
scl0070230.1_289	AK014378	NA	NA	459	0.058	1	7 +/- 10	14 +/- 10
scl36968.16.1_28	Alg9	ENSMUSG00000032059	asparagine-linked glycosylation 9 (alpha 1,2 mannosyltransferase)	459	0.059	1	16 +/- 12	0 +/- 9
scl37010.9.16_21	Fxyd2	ENSMUSG00000059412	FXYD domain-containing ion transport regulator 2	459	0.06	1	15 +/- 8	94 +/- 10
scl38497.1.1_138	Galnt4	ENSMUSG00000090035	UDP-N-acetyl-alpha-D-galactosamine:polypeptide N-acetylgalactosaminyltransferase 4	459	0.06	1	15 +/- 10	26 +/- 12
scl0014402.2_185	Gabrb3	ENSMUSG00000033676	gamma-aminobutyric acid (GABA) A receptor, subunit beta 3	459	0.06	1	23 +/- 12	19 +/- 12
scl00101739.1_35	Psip1	ENSMUSG00000028484	PC4 and SFRS1 interacting protein 1	459	0.06	1	19 +/- 12	1 +/- 9
scl022341.7_14	Vegfc	ENSMUSG00000031520	vascular endothelial growth factor C	459	0.06	1	16 +/- 10	29 +/- 13
scl21096.14_260	Tbc1d13	ENSMUSG00000039678	TBC1 domain family, member 13	459	0.061	1	23 +/- 12	28 +/- 11
scl0109168.12_22	5730596K20Rik	NA	NA	459	0.061	1	25 +/- 12	18 +/- 12
scl52233.6.1_3	Cabyr	ENSMUSG00000024430	calcium-binding tyrosine-(Y)-phosphorylation regulated (fibrousheathin 2)	459	0.061	1	21 +/- 12	7 +/- 10
scl50600.2.1_89	AK038632	NA	NA	459	0.061	1	11 +/- 11	0 +/- 9
scl52473.16_34	Crtac1	ENSMUSG00000042401	cartilage acidic protein 1	459	0.061	1	8 +/- 11	2 +/- 9
scl0001059.1_2	Ing3	ENSMUSG00000029670	inhibitor of growth family, member 3	459	0.062	1	23 +/- 11	31 +/- 12
scl0231503.1_74	BC062109	NA	NA	459	0.062	1	26 +/- 12	25 +/- 12
scl22947.3.8_31	S100a13	ENSMUSG00000042312	S100 calcium binding protein A13	459	0.062	1	9 +/- 11	1 +/- 9
scl000554.1_19	Mast3	ENSMUSG00000031833	microtubule associated serine/threonine kinase 3	459	0.062	1	10 +/- 11	1 +/- 9
scl16567.16_128	Cul3	ENSMUSG00000004364	cullin 3	459	0.063	1	9 +/- 10	11 +/- 10
ri|6720463L11|PX00059H16|AK032861|1928	Sfrs7	NA	NA	459	0.063	1	19 +/- 12	1 +/- 9
scl0004150.1_13	Mfsd10	ENSMUSG00000001082	major facilitator superfamily domain containing 10	459	0.063	1	21 +/- 11	22 +/- 12
scl27507.6.1_51	BC060616	NA	NA	459	0.063	1	13 +/- 12	0 +/- 9
scl16732.7.1_6	Ppil3	ENSMUSG00000026035	peptidylprolyl isomerase (cyclophilin)-like 3	459	0.063	1	19 +/- 12	23 +/- 10
scl29662.1.122_30	Edem1	ENSMUSG00000030104	ER degradation enhancer, mannosidase alpha-like 1	459	0.063	1	10 +/- 10	50 +/- 13
GI_38073326	Rpl29	ENSMUSG00000048758	ribosomal protein L29	459	0.064	1	11 +/- 8	95 +/- 10
ri|4930553C05|PX00035G02|AK016099|993	Rabl3	ENSMUSG00000022827	RAB, member RAS oncogene family-like 3	459	0.064	1	10 +/- 11	0 +/- 10
scl24852.14.1_95	Ubxn11	ENSMUSG00000012126	UBX domain protein 11	459	0.065	1	19 +/- 11	25 +/- 12
ri|9330161C17|PX00106I09|AK079084|1792	Tmem44	ENSMUSG00000022537	transmembrane protein 44	459	0.065	1	9 +/- 11	2 +/- 9
scl43917.11.1_43	BC021381	NA	NA	459	0.066	1	13 +/- 10	31 +/- 12
scl0001627.1_140	Atl2	ENSMUSG00000059811	atlastin GTPase 2	459	0.066	1	9 +/- 10	31 +/- 13
scl015903.3_124	Id3	ENSMUSG00000007872	inhibitor of DNA binding 3	459	0.066	1	26 +/- 13	23 +/- 12
scl48930.7.1_272	Chodl	ENSMUSG00000022860	chondrolectin	459	0.066	1	13 +/- 10	25 +/- 12
ri|2310050N03|ZX00054B22|AK009914|1969	Tia1	ENSMUSG00000071337	cytotoxic granule-associated RNA binding protein 1	459	0.067	1	14 +/- 9	90 +/- 10
scl24417.1.36_21	Dctn3	ENSMUSG00000028447	dynactin 3	459	0.067	1	8 +/- 10	11 +/- 9
scl30179.5.1_12	AK076827	NA	NA	459	0.067	1	18 +/- 11	23 +/- 12
scl0016396.1_119	Itch	ENSMUSG00000027598	itchy, E3 ubiquitin protein ligase	459	0.067	1	20 +/- 12	9 +/- 10
ri|A130068B11|PX00124P08|AK037970|2210	Lcp2	ENSMUSG00000002699	lymphocyte cytosolic protein 2	459	0.068	1	22 +/- 11	24 +/- 12
scl36392.1.1_3	AK082033	NA	NA	459	0.068	1	16 +/- 11	21 +/- 12
scl53382.12_567	Fads3	ENSMUSG00000024664	fatty acid desaturase 3	459	0.068	1	14 +/- 11	31 +/- 10
scl013527.8_0	Dtna	ENSMUSG00000024302	dystrobrevin alpha	459	0.069	1	20 +/- 12	6 +/- 10
scl4361.1.1_31	Olfr993	ENSMUSG00000075220	olfactory receptor 993	459	0.069	1	14 +/- 10	23 +/- 12
scl33085.7_52	Zfp606	ENSMUSG00000030386	zinc finger protein 606	459	0.069	1	23 +/- 12	22 +/- 12
scl072670.1_26	AK012841	NA	NA	459	0.07	1	7 +/- 9	73 +/- 12
scl15936.4.1_73	Klhdc9	ENSMUSG00000045259	kelch domain containing 9	459	0.07	1	11 +/- 11	48 +/- 12
scl0053413.2_143	Exoc7	ENSMUSG00000020792	exocyst complex component 7	459	0.07	1	7 +/- 9	19 +/- 9
scl016202.8_23	Ilk	ENSMUSG00000030890	integrin linked kinase	459	0.07	1	18 +/- 12	3 +/- 10
scl48822.17_669	Nlrc3	ENSMUSG00000049871	NLR family, CARD domain containing 3	459	0.07	1	22 +/- 12	15 +/- 11
scl24096.6_140	Mysm1	ENSMUSG00000062627	myb-like, SWIRM and MPN domains 1	459	0.07	1	8 +/- 11	7 +/- 10
scl50811.1.1_128	AK011616	NA	NA	459	0.07	1	18 +/- 11	19 +/- 12
scl22034.13_42	Gria2	ENSMUSG00000033981	glutamate receptor, ionotropic, AMPA2 (alpha 2)	459	0.071	1	18 +/- 11	22 +/- 12
scl0003459.1_490	Lrrfip2	ENSMUSG00000032497	leucine rich repeat (in FLII) interacting protein 2	459	0.072	1	13 +/- 10	40 +/- 13
scl0330599.1_104	LOC330599	NA	NA	459	0.072	1	19 +/- 11	22 +/- 12
ri|A330049H05|PX00131N14|AK039482|2188	NR_001461	NA	NA	459	0.072	1	24 +/- 12	41 +/- 12
scl0001516.1_2	Sgcd	ENSMUSG00000020354	sarcoglycan, delta (dystrophin-associated glycoprotein)	459	0.073	1	15 +/- 11	25 +/- 12
ri|C820018D16|PX00088B05|AK050560|1393	Ndfip1	ENSMUSG00000024425	Nedd4 family interacting protein 1	459	0.073	1	20 +/- 11	26 +/- 12
scl30187.2.1_182	Fmc1	NA	NA	459	0.073	1	19 +/- 12	6 +/- 10
scl19512.8.1_10	Rexo4	ENSMUSG00000052406	REX4, RNA exonuclease 4 homolog (S. cerevisiae)	459	0.073	1	9 +/- 10	27 +/- 12
scl41025.7_232	Lrrc59	ENSMUSG00000020869	leucine rich repeat containing 59	459	0.074	1	26 +/- 13	8 +/- 10
scl33613.21_157	Tbc1d9	ENSMUSG00000031709	TBC1 domain family, member 9	459	0.074	1	18 +/- 11	26 +/- 12
scl36548.17_86	Ryk	ENSMUSG00000032547	receptor-like tyrosine kinase	459	0.074	1	12 +/- 11	0 +/- 10
scl069326.1_76	Prelid2	ENSMUSG00000056671	PRELI domain containing 2	459	0.075	1	15 +/- 11	1 +/- 10
scl10074.1.1_80	AK077449	NA	NA	459	0.075	1	16 +/- 11	22 +/- 12
scl26679.9_306	D5Ertd579e	ENSMUSG00000029190	DNA segment, Chr 5, ERATO Doi 579, expressed	459	0.076	1	8 +/- 9	35 +/- 13
scl28463.14.1_30	Ccdc77	ENSMUSG00000030177	coiled-coil domain containing 77	459	0.076	1	18 +/- 11	33 +/- 13
ri|9330112I12|PX00104P17|AK033900|1392	AK033900	NA	NA	459	0.076	1	11 +/- 10	28 +/- 13
scl19346.22_0	Golga1	ENSMUSG00000026754	golgi autoantigen, golgin subfamily a, 1	459	0.076	1	18 +/- 11	22 +/- 12
scl20440.7.1_148	Disp2	ENSMUSG00000040035	dispatched homolog 2 (Drosophila)	459	0.076	1	7 +/- 9	37 +/- 13
scl0378937.1_229	Lrrc24	ENSMUSG00000033707	leucine rich repeat containing 24	459	0.077	1	14 +/- 11	10 +/- 10
scl000147.1_6	Sae1	ENSMUSG00000052833	SUMO1 activating enzyme subunit 1	459	0.077	1	9 +/- 9	35 +/- 13
GI_38082965	Wtap	ENSMUSG00000060475	Wilms tumour 1-associating protein	459	0.077	1	10 +/- 11	1 +/- 9
scl0002022.1_2978	AK172346	NA	NA	459	0.077	1	24 +/- 12	11 +/- 11
scl0226359.3_308	C1ql2	ENSMUSG00000036907	complement component 1, q subcomponent-like 2	459	0.077	1	8 +/- 9	72 +/- 12
scl28543.6.1_114	Rpusd3	ENSMUSG00000051169	RNA pseudouridylate synthase domain containing 3	459	0.077	1	20 +/- 12	11 +/- 11
scl30011.18.1_29	Gars	ENSMUSG00000029777	glycyl-tRNA synthetase	459	0.077	1	16 +/- 11	17 +/- 12
scl26977.11.1_171	Wasf3	ENSMUSG00000029636	WAS protein family, member 3	459	0.077	1	20 +/- 11	18 +/- 12
scl46653.2.1_18	Glycam1	ENSMUSG00000022491	glycosylation dependent cell adhesion molecule 1	459	0.077	1	10 +/- 11	1 +/- 10
scl00072.1_32	Rab6	NA	NA	459	0.077	1	4 +/- 7	87 +/- 10
scl076130.2_9	Las1l	ENSMUSG00000057421	LAS1-like (S. cerevisiae)	459	0.078	1	23 +/- 12	23 +/- 12
scl27250.2_266	Orai1	ENSMUSG00000049686	ORAI calcium release-activated calcium modulator 1	459	0.078	1	10 +/- 11	1 +/- 10
scl33290.1.1_243	AK013927	NA	NA	459	0.078	1	21 +/- 12	12 +/- 11
scl45800.5_19	D14Ertd449e	NA	NA	459	0.079	1	7 +/- 10	7 +/- 10
scl00216395.2_163	Tmem5	ENSMUSG00000034620	transmembrane protein 5	459	0.079	1	15 +/- 11	22 +/- 12
scl0016956.1_234	Lpl	ENSMUSG00000015568	lipoprotein lipase	459	0.08	1	5 +/- 9	49 +/- 12
scl43275.14_277	4930579E17Rik	NA	NA	459	0.08	1	8 +/- 9	32 +/- 12
scl00026.1_111	H47	NA	NA	459	0.08	1	19 +/- 11	26 +/- 12
scl44354.1.1_177	AK020116	NA	NA	459	0.08	1	8 +/- 10	24 +/- 10
scl35414.1_2	Nudt16	ENSMUSG00000032565	nudix (nucleoside diphosphate linked moiety X)-type motif 16	459	0.081	1	10 +/- 9	82 +/- 11
scl018639.4_213	Pfkfb1	ENSMUSG00000025271	6-phosphofructo-2-kinase/fructose-2,6-biphosphatase 1	459	0.081	1	11 +/- 10	23 +/- 12
GI_38090085	Msl2l1	NA	NA	459	0.081	1	19 +/- 11	16 +/- 11
scl069549.2_9	2310009B15Rik	ENSMUSG00000079283	RIKEN cDNA 2310009B15 gene	459	0.081	1	20 +/- 12	4 +/- 10
scl32512.3_58	Klhl25	ENSMUSG00000055652	kelch-like 25	459	0.082	1	16 +/- 11	23 +/- 12
scl020229.1_41	Sat1	ENSMUSG00000025283	spermidine/spermine N1-acetyl transferase 1	459	0.082	1	13 +/- 11	0 +/- 9
scl0002597.1_5	4732418C07Rik	NA	NA	459	0.083	1	20 +/- 11	20 +/- 12
scl0230657.2_67	Tmem69	ENSMUSG00000055900	transmembrane protein 69	459	0.083	1	20 +/- 11	22 +/- 12
scl0215015.1_6	Fam20b	ENSMUSG00000033557	family with sequence similarity 20, member B	459	0.084	1	11 +/- 10	61 +/- 12
scl0015467.2_272	Eif2ak1	ENSMUSG00000029613	eukaryotic translation initiation factor 2 alpha kinase 1	459	0.085	1	15 +/- 11	19 +/- 10
scl011435.1_1	Chrna1	ENSMUSG00000027107	cholinergic receptor, nicotinic, alpha polypeptide 1 (muscle)	459	0.085	1	15 +/- 11	22 +/- 12
scl0002910.1_314	Gripap1	ENSMUSG00000031153	GRIP1 associated protein 1	459	0.085	1	9 +/- 9	27 +/- 13
scl19362.25_47	Dennd1a	ENSMUSG00000035392	DENN/MADD domain containing 1A	459	0.086	1	22 +/- 12	7 +/- 10
GI_38080758	AK147443	NA	NA	459	0.086	1	17 +/- 11	14 +/- 11
scl18018.1_72	AK038597	NA	NA	459	0.086	1	10 +/- 10	23 +/- 12
scl39324.20.1_109	Recql5	ENSMUSG00000020752	RecQ protein-like 5	459	0.086	1	17 +/- 12	5 +/- 10
scl0234695.2_159	AK051288	NA	NA	459	0.086	1	20 +/- 12	12 +/- 11
scl45992.1.277_250	Slitrk5	ENSMUSG00000033214	SLIT and NTRK-like family, member 5	459	0.087	1	18 +/- 12	9 +/- 10
scl31481.11_594	Lsm14a	ENSMUSG00000066568	LSM14 homolog A (SCD6, S. cerevisiae)	459	0.087	1	21 +/- 12	9 +/- 10
scl0065971.2_58	1700021K02Rik	NA	NA	459	0.087	1	17 +/- 11	20 +/- 12
scl48388.1.45_188	2310061J03Rik	NA	NA	459	0.087	1	21 +/- 12	2 +/- 9
scl28031.14_314	Nub1	ENSMUSG00000028954	negative regulator of ubiquitin-like proteins 1	459	0.088	1	13 +/- 10	40 +/- 13
scl00228866.1_190	Pcif1	ENSMUSG00000039849	PDX1 C-terminal inhibiting factor 1	459	0.088	1	26 +/- 13	8 +/- 10
scl0000100.1_15	Clcn1	ENSMUSG00000029862	chloride channel 1	459	0.088	1	7 +/- 9	25 +/- 12
scl26896.34.1_29	Akap9	ENSMUSG00000040407	A kinase (PRKA) anchor protein (yotiao) 9	459	0.088	1	10 +/- 9	30 +/- 13
GI_38085610	Prpmp5	ENSMUSG00000107874	proline-rich protein MP5	459	0.088	1	19 +/- 11	14 +/- 11
ri|G430091H17|PH00001H10|AK090072|2232	OTTMUSG00000016644	NA	NA	459	0.088	1	14 +/- 11	9 +/- 11
scl31966.10.1_21	2310007H09Rik	NA	NA	459	0.088	1	24 +/- 12	23 +/- 12
scl0004176.1_1597	Pds5b	ENSMUSG00000034021	PDS5, regulator of cohesion maintenance, homolog B (S. cerevisiae)	459	0.088	1	22 +/- 12	10 +/- 10
scl29715.6_625	Fam19a1	ENSMUSG00000059187	family with sequence similarity 19, member A1	459	0.089	1	5 +/- 9	57 +/- 13
scl45886.2.16_202	Olfr720	ENSMUSG00000052417	olfactory receptor 720	459	0.089	1	12 +/- 10	24 +/- 12
scl25133.32.1_60	Nrd1	ENSMUSG00000053510	nardilysin, N-arginine dibasic convertase, NRD convertase 1	459	0.09	1	4 +/- 9	59 +/- 12
ri|C230080E09|PX00667M15|AK082664|1910	2610044O15Rik	NA	NA	459	0.09	1	17 +/- 11	19 +/- 10
scl00101497.2_226	Plekhg2	ENSMUSG00000037552	pleckstrin homology domain containing, family G (with RhoGef domain) member 2	459	0.09	1	15 +/- 11	7 +/- 11
scl36174.1.44_3	Zfp560	ENSMUSG00000045519	zinc finger protein 560	459	0.09	1	17 +/- 11	11 +/- 11
scl39171.1.14_4	BC018310	NA	NA	459	0.09	1	18 +/- 12	3 +/- 10
scl37802.13.1_87	Prmt2	ENSMUSG00000020230	protein arginine N-methyltransferase 2	459	0.09	1	18 +/- 12	14 +/- 11
ri|6430553K24|PX00648N21|AK078268|1214	mKIAA0377	NA	NA	459	0.09	1	3 +/- 8	62 +/- 12
scl18466.10_8	Ahcy	ENSMUSG00000027597	S-adenosylhomocysteine hydrolase	459	0.091	1	10 +/- 8	86 +/- 11
scl36514.13.4_62	Wdr51a	NA	NA	459	0.091	1	5 +/- 9	51 +/- 13
scl51773.17.1_8	Mbd1	ENSMUSG00000024561	methyl-CpG binding domain protein 1	459	0.091	1	11 +/- 10	24 +/- 12
scl0003729.1_9	Pfkp	ENSMUSG00000021196	phosphofructokinase, platelet	459	0.091	1	13 +/- 10	29 +/- 13
ri|9830140K13|PX00655A22|AK079410|873	1810014F10Rik	NA	NA	459	0.091	1	21 +/- 12	11 +/- 11
scl40083.7.1_85	Cox10	ENSMUSG00000042148	cytochrome c oxidase assembly protein 10	459	0.091	1	16 +/- 12	2 +/- 10
GI_38091589	AK205379	NA	NA	459	0.091	1	25 +/- 11	78 +/- 11
GI_38084989	1500001M20Rik	NA	NA	459	0.091	1	13 +/- 12	0 +/- 9
scl0003171.1_33	Psmb7	ENSMUSG00000026750	proteasome (prosome, macropain) subunit, beta type 7	459	0.092	1	10 +/- 10	35 +/- 13
scl45237.1_212	Pcdh9	ENSMUSG00000055421	protocadherin 9	459	0.092	1	10 +/- 11	0 +/- 9
scl0013121.2_8	Cyp51	ENSMUSG00000001467	cytochrome P450, family 51	459	0.092	1	14 +/- 10	19 +/- 11
scl20704.5_69	Zfp804a	ENSMUSG00000070866	zinc finger protein 804A	459	0.092	1	15 +/- 11	8 +/- 11
scl24791.10_1	Ddost	ENSMUSG00000028757	dolichyl-di-phosphooligosaccharide-protein glycotransferase	459	0.092	1	21 +/- 12	14 +/- 11
scl0003689.1_62	Erbb2ip	ENSMUSG00000021709	Erbb2 interacting protein	459	0.093	1	11 +/- 10	27 +/- 12
scl075642.1_182	1700020C07Rik	NA	NA	459	0.093	1	16 +/- 11	13 +/- 11
scl36161.8.1_55	Olfm2	ENSMUSG00000032172	olfactomedin 2	459	0.093	1	16 +/- 11	5 +/- 10
scl25750.10.1_14	Katnal1	ENSMUSG00000106892	katanin p60 subunit A-like 1	459	0.093	1	6 +/- 10	9 +/- 10
ri|2500004H04|ZX00052F16|AK010873|627	Hbb-b1	NA	NA	459	0.094	1	14 +/- 11	15 +/- 10
scl52870.7_104	Ehd1	ENSMUSG00000024772	EH-domain containing 1	459	0.094	1	24 +/- 12	15 +/- 11
scl0002625.1_41	2210012G02Rik	NA	NA	459	0.094	1	5 +/- 9	44 +/- 13
scl47919.3_631	Utp23	ENSMUSG00000022313	UTP23, small subunit (SSU) processome component, homolog (yeast)	459	0.095	1	19 +/- 11	22 +/- 12
GI_6755205	Psmb7	ENSMUSG00000026750	proteasome (prosome, macropain) subunit, beta type 7	459	0.095	1	16 +/- 11	27 +/- 12
ri|A830038O22|PX00155K10|AK043836|1925	Wdr19	ENSMUSG00000037890	WD repeat domain 19	459	0.095	1	21 +/- 11	17 +/- 11
scl0076438.2_4	Rftn1	ENSMUSG00000039316	raftlin lipid raft linker 1	459	0.095	1	16 +/- 10	26 +/- 12
scl00214572.1_279	Prmt7	ENSMUSG00000060098	protein arginine N-methyltransferase 7	459	0.095	1	15 +/- 11	4 +/- 10
scl00226432.1_235	Ipo9	ENSMUSG00000041879	importin 9	459	0.096	1	12 +/- 10	35 +/- 13
scl0011829.2_75	Aqp4	ENSMUSG00000024411	aquaporin 4	459	0.096	1	23 +/- 12	16 +/- 11
scl47498.1.1_244	Slc4a8	ENSMUSG00000023032	solute carrier family 4 (anion exchanger), member 8	459	0.096	1	11 +/- 10	33 +/- 13
scl19373.1.1_275	Strbp	ENSMUSG00000026915	spermatid perinuclear RNA binding protein	459	0.096	1	21 +/- 11	27 +/- 12
scl015107.1_301	Hadh	ENSMUSG00000027984	hydroxyacyl-Coenzyme A dehydrogenase	459	0.097	1	8 +/- 10	24 +/- 12
scl018101.3_197	Nmbr	ENSMUSG00000019865	neuromedin B receptor	459	0.098	1	15 +/- 11	17 +/- 11
scl31584.11.1_18	Timm50	ENSMUSG00000003438	translocase of inner mitochondrial membrane 50	459	0.098	1	14 +/- 11	7 +/- 11
scl28741.20.2224_6	Antxr1	ENSMUSG00000033420	anthrax toxin receptor 1	459	0.098	1	13 +/- 10	23 +/- 12
scl30706.6.2_3	Zkscan2	ENSMUSG00000030757	zinc finger with KRAB and SCAN domains 2	459	0.099	1	16 +/- 10	24 +/- 12
GI_38074810	Sp9	ENSMUSG00000068859	trans-acting transcription factor 9	459	0.099	1	16 +/- 11	6 +/- 10
scl067065.1_152	Polr3d	ENSMUSG00000000776	polymerase (RNA) III (DNA directed) polypeptide D	459	0.099	1	20 +/- 12	18 +/- 11
scl0003496.1_3	Armc8	ENSMUSG00000032468	armadillo repeat containing 8	459	0.1	1	17 +/- 12	35 +/- 12
scl0018616.2_167	Peg3	ENSMUSG00000002265	paternally expressed 3	459	0.1	1	18 +/- 12	8 +/- 10
scl00268451.2_250	Rab11fip4	ENSMUSG00000017639	RAB11 family interacting protein 4 (class II)	459	0.1	1	21 +/- 12	18 +/- 12
scl24275.17_17	AK088920	NA	NA	459	0.1	1	20 +/- 12	17 +/- 11
scl0003587.1_36	Herpud2	ENSMUSG00000008429	HERPUD family member 2	459	0.1	1	24 +/- 12	19 +/- 12
scl0002463.1_48	Ttc33	ENSMUSG00000022151	tetratricopeptide repeat domain 33	459	0.1	1	22 +/- 12	14 +/- 11
scl0002453.1_157	Tef	ENSMUSG00000022389	thyrotroph embryonic factor	459	0.1	1	11 +/- 10	24 +/- 12
scl0003791.1_56	Slc6a15	ENSMUSG00000019894	solute carrier family 6 (neurotransmitter transporter), member 15	459	0.1	1	12 +/- 10	25 +/- 12
GI_38050402	Gm527	ENSMUSG00000047227	predicted gene 527	459	0.1	1	22 +/- 12	17 +/- 11
scl0003112.1_0	Acot8	ENSMUSG00000017307	acyl-CoA thioesterase 8	459	0.1	1	15 +/- 11	17 +/- 11
scl021566.1_4	LOC236118	NA	NA	459	0.1	1	17 +/- 11	22 +/- 12
scl073051.2_144	AK013710	NA	NA	459	0.1	1	14 +/- 11	9 +/- 11
scl0217827.2_0	BC002230	NA	NA	459	0.1	1	18 +/- 11	22 +/- 11
scl30520.6.1_21	Caly	ENSMUSG00000025468	calcyon neuron-specific vesicular protein	459	0.1	1	21 +/- 12	6 +/- 10
scl0003740.1_177	Txndc5	ENSMUSG00000038991	thioredoxin domain containing 5	459	0.1	1	18 +/- 11	10 +/- 11
scl42643.14_408	Klhl29	ENSMUSG00000020627	kelch-like 29	459	0.1	1	17 +/- 11	24 +/- 12
scl21948.4.1_81	Rag1ap1	NA	NA	459	0.1	1	14 +/- 10	23 +/- 12
scl054673.4_1	Sh3glb1	ENSMUSG00000037062	SH3-domain GRB2-like B1 (endophilin)	459	0.1	1	15 +/- 12	1 +/- 10
ri|9230102G06|PX00316C23|AK078990|916	Ubfd1	ENSMUSG00000030870	ubiquitin family domain containing 1	459	0.1	1	10 +/- 10	24 +/- 12
ri|5830416C23|PX00038P22|AK020013|2361	Ctnnb1	ENSMUSG00000006932	catenin (cadherin associated protein), beta 1	459	0.1	1	13 +/- 11	1 +/- 10
scl0080892.2_161	Zfhx4	ENSMUSG00000025255	zinc finger homeodomain 4	459	0.1	1	10 +/- 10	5 +/- 10
scl022135.1_141	Tgoln1	ENSMUSG00000056429	trans-golgi network protein	459	0.1	1	8 +/- 11	0 +/- 10
scl35236.4_464	Cmc1	ENSMUSG00000039163	COX assembly mitochondrial protein 1	459	0.1	1	11 +/- 11	0 +/- 9
scl52179.17.1_47	Mocos	ENSMUSG00000039616	molybdenum cofactor sulfurase	459	0.1	1	10 +/- 9	26 +/- 12
scl0003677.1_1	Mast4	ENSMUSG00000034751	microtubule associated serine/threonine kinase family member 4	459	0.1	1	16 +/- 11	29 +/- 12
scl42724.5.1_68	BC022687	ENSMUSG00000037594	cDNA sequence BC022687	459	0.1	1	23 +/- 12	9 +/- 10
scl44836.4.1_5	AK042843	NA	NA	459	0.1	1	8 +/- 11	0 +/- 10
ri|C630002N04|PX00083E02|AK049839|1398	NR_002321	NA	NA	459	0.1	1	11 +/- 11	0 +/- 9
scl0107375.1_234	Slc25a45	ENSMUSG00000024818	solute carrier family 25, member 45	459	0.1	1	16 +/- 12	3 +/- 10
ri|A830087P12|PX00156G08|AK044077|2563	AK044077	NA	NA	459	0.1	1	7 +/- 11	1 +/- 9
scl29606.9_357	Mkrn2	ENSMUSG00000000439	makorin, ring finger protein, 2	459	0.1	1	6 +/- 10	4 +/- 9
scl0074665.1_81	Lrrc48	ENSMUSG00000056598	leucine rich repeat containing 48	459	0.11	1	3 +/- 8	49 +/- 10
scl16572.10_105	Serpine2	ENSMUSG00000026249	serine (or cysteine) peptidase inhibitor, clade E, member 2	459	0.11	1	4 +/- 9	60 +/- 12
ri|E030040L08|PX00206L11|AK087265|1360	Gns	ENSMUSG00000034707	glucosamine (N-acetyl)-6-sulfatase	459	0.11	1	3 +/- 8	78 +/- 11
ri|9330200H04|PX00107H17|AK034497|3215	Pex5l	ENSMUSG00000027674	peroxisomal biogenesis factor 5-like	459	0.11	1	3 +/- 8	65 +/- 12
scl00217995.1_300	Heatr1	ENSMUSG00000050244	HEAT repeat containing 1	459	0.11	1	5 +/- 9	52 +/- 13
scl13419.1.1_176	AK020202	NA	NA	459	0.11	1	6 +/- 9	41 +/- 12
scl066184.1_108	1110033J19Rik	NA	NA	459	0.11	1	11 +/- 10	42 +/- 13
scl51469.24.1_0	Lars	ENSMUSG00000024493	leucyl-tRNA synthetase	459	0.11	1	6 +/- 9	40 +/- 13
scl18267.7.1_49	Bmp7	ENSMUSG00000008999	bone morphogenetic protein 7	459	0.11	1	10 +/- 10	26 +/- 12
scl26118.9.1_34	Sdsl	ENSMUSG00000029596	serine dehydratase-like	459	0.11	1	17 +/- 11	36 +/- 13
scl024018.16_30	Rngtt	ENSMUSG00000028274	RNA guanylyltransferase and 5'-phosphatase	459	0.11	1	17 +/- 12	2 +/- 9
scl41448.13.1_85	Trpv2	ENSMUSG00000018507	transient receptor potential cation channel, subfamily V, member 2	459	0.11	1	9 +/- 11	2 +/- 9
scl0066226.1_62	Trappc2	ENSMUSG00000079317	trafficking protein particle complex 2	459	0.11	1	25 +/- 12	17 +/- 11
scl00230073.2_277	Ddx58	ENSMUSG00000040296	DEAD (Asp-Glu-Ala-Asp) box polypeptide 58	459	0.11	1	12 +/- 10	26 +/- 12
scl16774.9.1_40	1700019D03Rik	ENSMUSG00000043629	RIKEN cDNA 1700019D03 gene	459	0.11	1	8 +/- 9	27 +/- 13
scl27020.1.25_10	AK039135	NA	NA	459	0.11	1	18 +/- 11	20 +/- 12
scl075964.2_56	D030074E01Rik	NA	NA	459	0.11	1	19 +/- 12	6 +/- 10
ri|B430204E11|PX00071C21|AK080908|3394	BC057074	NA	NA	459	0.11	1	8 +/- 10	1 +/- 10
scl012296.6_6	Cacnb2	ENSMUSG00000057914	calcium channel, voltage-dependent, beta 2 subunit	459	0.11	1	12 +/- 10	20 +/- 12
scl0003598.1_52	Plod2	ENSMUSG00000032374	procollagen lysine, 2-oxoglutarate 5-dioxygenase 2	459	0.11	1	22 +/- 12	22 +/- 12
scl0001711.1_8	Nrxn1	ENSMUSG00000024109	neurexin I	459	0.11	1	18 +/- 11	26 +/- 12
ri|6230401I02|PX00041P22|AK018078|1668	Gnaq	ENSMUSG00000024639	guanine nucleotide binding protein, alpha q polypeptide	459	0.11	1	13 +/- 10	23 +/- 12
scl46254.30.2_18	Parp4	ENSMUSG00000054509	poly (ADP-ribose) polymerase family, member 4	459	0.11	1	23 +/- 11	24 +/- 12
scl0109238.1_107	Tmem216	ENSMUSG00000024667	transmembrane protein 216	459	0.11	1	16 +/- 11	21 +/- 12
scl020811.2_99	Srms	ENSMUSG00000027579	src-related kinase lacking C-terminal regulatory tyrosine and N-terminal myristylation sites	459	0.11	1	15 +/- 10	20 +/- 12
ri|A730075L14|PX00152G11|AK043246|1249	AK043246	NA	NA	459	0.11	1	12 +/- 11	4 +/- 10
scl018542.3_8	Pcolce	ENSMUSG00000029718	procollagen C-endopeptidase enhancer protein	459	0.11	1	20 +/- 11	20 +/- 12
ri|2310007G05|ZX00052E05|AK009204|1092	Foxp4	ENSMUSG00000023991	forkhead box P4	459	0.11	1	23 +/- 12	7 +/- 10
scl50687.4.1_27	Tcte1	ENSMUSG00000023949	t-complex-associated testis expressed 1	459	0.11	1	21 +/- 12	15 +/- 11
scl17491.6.1_47	Rab29	ENSMUSG00000026433	RAB29, member RAS oncogene family	459	0.11	1	23 +/- 12	21 +/- 12
scl00036.1_15	Mrps11	ENSMUSG00000030611	mitochondrial ribosomal protein S11	459	0.11	1	14 +/- 11	2 +/- 10
scl6610.1.1_106	Olfr975	ENSMUSG00000043331	olfactory receptor 975	459	0.11	1	14 +/- 10	22 +/- 12
scl31226.15_497	AK136368	NA	NA	459	0.11	1	12 +/- 10	26 +/- 12
scl076437.1_89	AK009365	NA	NA	459	0.11	1	14 +/- 10	30 +/- 12
scl0083380.1_28	Prh1	ENSMUSG00000059934	proline rich protein HaeIII subfamily 1	459	0.11	1	6 +/- 10	1 +/- 10
scl19556.3.1_14	Phpt1	ENSMUSG00000036504	phosphohistidine phosphatase 1	459	0.11	1	23 +/- 12	15 +/- 11
scl18799.18.1_164	Ltk	ENSMUSG00000027297	leukocyte tyrosine kinase	459	0.11	1	2 +/- 8	61 +/- 12
scl066356.1_13	2310008H09Rik	NA	NA	459	0.11	1	11 +/- 11	1 +/- 9
scl00108735.2_193	Sft2d2	ENSMUSG00000040848	SFT2 domain containing 2	459	0.12	1	7 +/- 10	26 +/- 10
ri|9430009A01|PX00108G09|AK034574|3503	Zbtb20	ENSMUSG00000022708	zinc finger and BTB domain containing 20	459	0.12	1	8 +/- 10	52 +/- 13
scl0069102.1_328	AK081879	NA	NA	459	0.12	1	3 +/- 8	70 +/- 12
scl53913.2_14	Zcchc5	ENSMUSG00000047686	zinc finger, CCHC domain containing 5	459	0.12	1	6 +/- 9	30 +/- 13
scl0018576.1_46	Pde3b	ENSMUSG00000030671	phosphodiesterase 3B, cGMP-inhibited	459	0.12	1	7 +/- 10	22 +/- 12
ri|A130064K07|PX00124I04|AK037927|2987	Rhobtb2	ENSMUSG00000022075	Rho-related BTB domain containing 2	459	0.12	1	5 +/- 9	33 +/- 13
scl0003318.1_26	AK047243	NA	NA	459	0.12	1	7 +/- 9	24 +/- 12
scl31048.11.1_1	Ankrd42	ENSMUSG00000041343	ankyrin repeat domain 42	459	0.12	1	4 +/- 9	48 +/- 13
scl39937.19_289	Rpa1	ENSMUSG00000000751	replication protein A1	459	0.12	1	7 +/- 9	28 +/- 12
scl076071.13_258	Jakmip1	ENSMUSG00000063646	janus kinase and microtubule interacting protein 1	459	0.12	1	10 +/- 11	0 +/- 9
scl46991.17.2_22	Tmprss6	ENSMUSG00000016942	transmembrane serine protease 6	459	0.12	1	6 +/- 9	26 +/- 12
scl31809.10.1_30	Syt5	ENSMUSG00000004961	synaptotagmin V	459	0.12	1	11 +/- 10	30 +/- 13
scl017772.15_137	Mtm1	ENSMUSG00000031337	X-linked myotubular myopathy gene 1	459	0.12	1	17 +/- 11	21 +/- 12
scl36812.9_155	Parp16	ENSMUSG00000032392	poly (ADP-ribose) polymerase family, member 16	459	0.12	1	23 +/- 12	17 +/- 11
scl34081.10.510_67	Carkd	ENSMUSG00000031505	carbohydrate kinase domain containing	459	0.12	1	18 +/- 11	21 +/- 12
scl42976.13.1_6	Coq6	ENSMUSG00000021235	coenzyme Q6 homolog (yeast)	459	0.12	1	9 +/- 10	25 +/- 12
scl29560.8_88	Bcl2l13	ENSMUSG00000009112	BCL2-like 13 (apoptosis facilitator)	459	0.12	1	16 +/- 12	2 +/- 10
ri|E230027K01|PX00210L05|AK054197|2665	A630054L15Rik	NA	NA	459	0.12	1	11 +/- 10	26 +/- 12
scl00216613.2_179	Ccdc85a	ENSMUSG00000032878	coiled-coil domain containing 85A	459	0.12	1	18 +/- 11	16 +/- 11
scl24663.4_10	Klhl21	ENSMUSG00000073700	kelch-like 21	459	0.12	1	13 +/- 10	23 +/- 12
scl20918.1.1_187	AK030345	NA	NA	459	0.12	1	21 +/- 12	13 +/- 11
scl0012846.1_253	Comt1	NA	NA	459	0.12	1	19 +/- 11	22 +/- 12
ri|B930060K05|PX00164N04|AK047429|1241	Zfp131	ENSMUSG00000094870	zinc finger protein 131	459	0.12	1	18 +/- 11	16 +/- 11
scl53077.5.8_20	Gsto1	ENSMUSG00000025068	glutathione S-transferase omega 1	459	0.12	1	7 +/- 9	29 +/- 12
scl37269.5.71_15	AK030359	NA	NA	459	0.12	1	17 +/- 11	15 +/- 11
scl0056722.2_11	Litaf	ENSMUSG00000022500	LPS-induced TN factor	459	0.12	1	12 +/- 10	25 +/- 12
ri|9330158N06|PX00105N08|AK034130|3185	Slc38a1	ENSMUSG00000023169	solute carrier family 38, member 1	459	0.12	1	18 +/- 11	21 +/- 12
scl0001899.1_913	Il1rap	ENSMUSG00000022514	interleukin 1 receptor accessory protein	459	0.12	1	13 +/- 11	2 +/- 10
ri|A430092J05|PX00138P22|AK040413|1157	Sntb2	ENSMUSG00000041308	syntrophin, basic 2	459	0.12	1	17 +/- 11	19 +/- 12
scl014356.3_2	Fxc1	NA	NA	459	0.12	1	9 +/- 11	0 +/- 10
scl0001785.1_33	2900011O08Rik	ENSMUSG00000044117	RIKEN cDNA 2900011O08 gene	459	0.12	1	20 +/- 12	19 +/- 12
GI_38078903	Rpl31	ENSMUSG00000073702	ribosomal protein L31	459	0.12	1	14 +/- 11	5 +/- 10
GI_20946715	5730507C01Rik	ENSMUSG00000073197	RIKEN cDNA 5730507C01 gene	459	0.12	1	19 +/- 11	19 +/- 12
scl27202.3.4_21	AK006725	NA	NA	459	0.12	1	20 +/- 12	16 +/- 11
scl22797.19_196	Csde1	ENSMUSG00000068823	cold shock domain containing E1, RNA binding	459	0.12	1	8 +/- 11	1 +/- 9
scl0224105.1_51	Pak2	ENSMUSG00000022781	p21 protein (Cdc42/Rac)-activated kinase 2	459	0.12	1	21 +/- 11	25 +/- 12
scl52031.1.122_226	AK013700	NA	NA	459	0.12	1	15 +/- 12	10 +/- 10
scl28068.2_468	Fgl2	ENSMUSG00000039899	fibrinogen-like protein 2	459	0.12	1	16 +/- 12	2 +/- 10
scl016180.8_13	Il1rap	ENSMUSG00000022514	interleukin 1 receptor accessory protein	459	0.12	1	20 +/- 11	15 +/- 11
scl21242.3.1_21	AK076779	NA	NA	459	0.12	1	23 +/- 12	15 +/- 11
scl27788.8.2924_41	mKIAA1239	NA	NA	459	0.12	1	13 +/- 11	5 +/- 10
scl15963.1.277_98	Ddr2	ENSMUSG00000026674	discoidin domain receptor family, member 2	459	0.12	1	15 +/- 11	17 +/- 12
IGKV5-48_V01564_Ig_kappa_variable_5-48_120	abParts	NA	NA	459	0.12	1	23 +/- 12	11 +/- 11
scl0269800.4_37	Zfp384	ENSMUSG00000038346	zinc finger protein 384	459	0.12	1	19 +/- 11	9 +/- 11
scl0230700.12_302	Foxj3	ENSMUSG00000032998	forkhead box J3	459	0.12	1	17 +/- 11	21 +/- 12
scl53624.9_65	Syap1	ENSMUSG00000031357	synapse associated protein 1	459	0.12	1	18 +/- 11	15 +/- 11
scl019653.6_14	Rbm4	ENSMUSG00000094936	RNA binding motif protein 4	459	0.12	1	7 +/- 11	0 +/- 9
scl23223.18.1_3	AK029958	NA	NA	459	0.12	1	10 +/- 9	19 +/- 12
scl50997.3.1_2	Nme3	ENSMUSG00000073435	NME/NM23 nucleoside diphosphate kinase 3	459	0.12	1	6 +/- 10	2 +/- 10
GI_38083578	Gm949	NA	NA	459	0.13	1	5 +/- 9	51 +/- 13
scl31719.6_147	Grlf1	NA	NA	459	0.13	1	13 +/- 8	89 +/- 10
scl0066552.1_146	2010106G01Rik	NA	NA	459	0.13	1	5 +/- 9	47 +/- 12
scl014696.1_75	Gnb4	ENSMUSG00000027669	guanine nucleotide binding protein (G protein), beta 4	459	0.13	1	14 +/- 11	44 +/- 13
ri|1810026C22|R000023M13|AK007605|939	AK007605	NA	NA	459	0.13	1	16 +/- 11	42 +/- 13
scl42528.12.1_19	Bzw2	ENSMUSG00000020547	basic leucine zipper and W2 domains 2	459	0.13	1	18 +/- 11	24 +/- 12
scl24183.14_264	Nfib	ENSMUSG00000008575	nuclear factor I/B	459	0.13	1	15 +/- 11	38 +/- 13
scl34329.24.1_1	Fuk	ENSMUSG00000033703	fucokinase	459	0.13	1	26 +/- 13	12 +/- 10
scl49383.8_582	Ypel1	ENSMUSG00000022773	yippee-like 1 (Drosophila)	459	0.13	1	8 +/- 9	27 +/- 12
scl0020771.1_0	Mucl1	ENSMUSG00000060311	mucin-like 1	459	0.13	1	13 +/- 10	21 +/- 12
scl24422.2_383	AI464131	ENSMUSG00000046312	expressed sequence AI464131	459	0.13	1	5 +/- 9	44 +/- 13
scl0001402.1_96	Tnip1	ENSMUSG00000020400	TNFAIP3 interacting protein 1	459	0.13	1	10 +/- 10	19 +/- 11
ri|2810407C02|ZX00034B10|AK013022|1179	2810407C02Rik	NA	NA	459	0.13	1	14 +/- 12	0 +/- 9
scl34546.7.1_7	Asna1	ENSMUSG00000052456	arsA arsenite transporter, ATP-binding, homolog 1 (bacterial)	459	0.13	1	22 +/- 12	30 +/- 13
scl41333.33.1_21	Mink1	ENSMUSG00000020827	misshapen-like kinase 1 (zebrafish)	459	0.13	1	17 +/- 11	15 +/- 11
scl0170460.6_30	Stard5	ENSMUSG00000046027	StAR-related lipid transfer (START) domain containing 5	459	0.13	1	12 +/- 11	27 +/- 12
scl0056419.2_241	Diap3	ENSMUSG00000022021	diaphanous homolog 3 (Drosophila)	459	0.13	1	13 +/- 10	25 +/- 12
scl0001479.1_77	Ccng1	ENSMUSG00000020326	cyclin G1	459	0.13	1	10 +/- 11	0 +/- 9
scl0002257.1_38	Rnf14	ENSMUSG00000060450	ring finger protein 14	459	0.13	1	19 +/- 11	17 +/- 12
GI_38082052	mKIAA0590	NA	NA	459	0.13	1	19 +/- 12	7 +/- 10
scl0018519.1_112	Kat2b	ENSMUSG00000000708	K(lysine) acetyltransferase 2B	459	0.13	1	19 +/- 11	25 +/- 12
scl072508.1_0	Rps6kb1	ENSMUSG00000020516	ribosomal protein S6 kinase, polypeptide 1	459	0.13	1	26 +/- 12	23 +/- 12
scl41891.15_195	Sf3a1	ENSMUSG00000002129	splicing factor 3a, subunit 1	459	0.13	1	18 +/- 11	22 +/- 12
scl0234988.3_288	Mbd3l2	ENSMUSG00000047508	methyl-CpG binding domain protein 3-like 2	459	0.13	1	9 +/- 10	23 +/- 12
scl21177.47.1_118	Abca2	ENSMUSG00000026944	ATP-binding cassette, sub-family A (ABC1), member 2	459	0.13	1	19 +/- 12	9 +/- 11
scl24667.4.1_169	Uts2	ENSMUSG00000028963	urotensin 2	459	0.13	1	9 +/- 10	22 +/- 12
scl0004095.1_33	Zcchc8	ENSMUSG00000029427	zinc finger, CCHC domain containing 8	459	0.13	1	12 +/- 10	24 +/- 12
scl38644.7_75	Aes	ENSMUSG00000054452	amino-terminal enhancer of split	459	0.13	1	17 +/- 12	5 +/- 10
scl33299.10_656	Vat1l	ENSMUSG00000046844	vesicle amine transport protein 1 homolog-like (T. californica)	459	0.13	1	7 +/- 9	23 +/- 12
scl071590.1_147	Tmtc3	ENSMUSG00000036676	transmembrane and tetratricopeptide repeat containing 3	459	0.13	1	13 +/- 10	21 +/- 12
scl0067273.2_276	Ndufa10	ENSMUSG00000026260	NADH dehydrogenase (ubiquinone) 1 alpha subcomplex 10	459	0.13	1	17 +/- 11	6 +/- 10
scl016668.7_96	Krt18	ENSMUSG00000023043	keratin 18	459	0.13	1	8 +/- 9	23 +/- 12
scl056708.1_17	Clcf1	ENSMUSG00000040663	cardiotrophin-like cytokine factor 1	459	0.13	1	15 +/- 11	18 +/- 12
ri|A730045A15|PX00150F20|AK042980|1596	2006-03-01	NA	NA	459	0.13	1	25 +/- 12	24 +/- 12
scl46190.7.1_7	2610028A01Rik	NA	NA	459	0.13	1	16 +/- 11	7 +/- 10
scl017936.1_8	Nab1	ENSMUSG00000002881	Ngfi-A binding protein 1	459	0.13	1	15 +/- 10	25 +/- 12
scl28372.11.1_5	Tspan9	ENSMUSG00000030352	tetraspanin 9	459	0.13	1	13 +/- 11	19 +/- 11
scl0011765.2_189	Ap1g1	ENSMUSG00000031731	adaptor protein complex AP-1, gamma 1 subunit	459	0.13	1	16 +/- 12	3 +/- 10
scl0014702.1_273	Gng2	ENSMUSG00000043004	guanine nucleotide binding protein (G protein), gamma 2	459	0.13	1	22 +/- 12	14 +/- 11
scl23093.1.1_122	AK031097	NA	NA	459	0.13	1	9 +/- 10	41 +/- 13
scl52537.9_557	Lipa	ENSMUSG00000024781	lysosomal acid lipase A	459	0.13	1	11 +/- 11	2 +/- 10
scl066637.1_226	5730449L18Rik	NA	NA	459	0.13	1	17 +/- 11	20 +/- 12
scl29716.2_77	Kbtbd8	ENSMUSG00000030031	kelch repeat and BTB (POZ) domain containing 8	459	0.13	1	20 +/- 12	5 +/- 10
scl36492.10.1_4	Ifrd2	ENSMUSG00000010048	interferon-related developmental regulator 2	459	0.13	1	12 +/- 11	2 +/- 10
scl23500.2.1_152	Cort	ENSMUSG00000028971	cortistatin	459	0.13	1	7 +/- 11	2 +/- 9
ri|4732433O14|PX00050L12|AK028684|2735	Psd3	ENSMUSG00000030465	pleckstrin and Sec7 domain containing 3	459	0.13	1	6 +/- 10	2 +/- 10
ri|9330132O05|PX00104P12|AK020369|855	Tmem58	NA	NA	459	0.13	1	5 +/- 10	15 +/- 10
scl21867.7.1_21	Ncrna00166	NA	NA	459	0.13	1	9 +/- 10	58 +/- 12
scl16174.14.1_64	BC003331	ENSMUSG00000006010	cDNA sequence BC003331	459	0.13	1	3 +/- 7	60 +/- 9
scl16459.13.6_3	Stk25	ENSMUSG00000026277	serine/threonine kinase 25 (yeast)	459	0.14	1	9 +/- 9	62 +/- 12
scl0226154.4_125	Lzts2	ENSMUSG00000035342	leucine zipper, putative tumor suppressor 2	459	0.14	1	5 +/- 10	11 +/- 10
ri|0910001P14|R000005H07|AK003096|623	Hbb-b1	NA	NA	459	0.14	1	20 +/- 12	19 +/- 11
scl36984.16.1_60	Zw10	ENSMUSG00000032264	zw10 kinetochore protein	459	0.14	1	4 +/- 9	44 +/- 13
scl54611.2_16	Tceal1	ENSMUSG00000049536	transcription elongation factor A (SII)-like 1	459	0.14	1	19 +/- 12	5 +/- 10
GI_31560655	Pabpc1	ENSMUSG00000022283	poly(A) binding protein, cytoplasmic 1	459	0.14	1	18 +/- 12	23 +/- 12
scl46086.2_122	Kctd4	ENSMUSG00000046523	potassium channel tetramerisation domain containing 4	459	0.14	1	15 +/- 11	24 +/- 12
scl0071151.1_199	Exod1	NA	NA	459	0.14	1	13 +/- 10	25 +/- 12
scl27865.1.1_140	AK020045	NA	NA	459	0.14	1	21 +/- 12	18 +/- 11
ri|D930034L10|PX00202L08|AK086527|3511	AK088634	NA	NA	459	0.14	1	7 +/- 10	25 +/- 12
scl0226928.1_84	Rims1	ENSMUSG00000041670	regulating synaptic membrane exocytosis 1	459	0.14	1	10 +/- 10	24 +/- 12
scl0016688.1_300	Krt6b	ENSMUSG00000023041	keratin 6B	459	0.14	1	6 +/- 9	22 +/- 12
scl41280.17_8	Mett10d	NA	NA	459	0.14	1	11 +/- 10	25 +/- 12
scl2369.1.1_21	Mllt3	ENSMUSG00000028496	myeloid/lymphoid or mixed-lineage leukemia (trithorax homolog, Drosophila); translocated to, 3	459	0.14	1	8 +/- 9	27 +/- 12
scl33627.1.1_30	AK014508	NA	NA	459	0.14	1	11 +/- 10	21 +/- 12
scl0012035.2_16	Bcat1	ENSMUSG00000030268	branched chain aminotransferase 1, cytosolic	459	0.14	1	21 +/- 11	19 +/- 12
scl31619.10_330	Cyp2s1	ENSMUSG00000040703	cytochrome P450, family 2, subfamily s, polypeptide 1	459	0.14	1	27 +/- 13	15 +/- 11
scl0071566.2_189	9030425E11Rik	NA	NA	459	0.14	1	5 +/- 9	59 +/- 12
scl45770.11.1_1	Gnl3	ENSMUSG00000042354	guanine nucleotide binding protein-like 3 (nucleolar)	459	0.14	1	12 +/- 10	20 +/- 12
ri|5430400L16|PX00022G07|AK077369|1399	2310022A10Rik	ENSMUSG00000049643	RIKEN cDNA 2310022A10 gene	459	0.14	1	11 +/- 10	27 +/- 13
scl38879.8_20	4632428N05Rik	ENSMUSG00000020101	RIKEN cDNA 4632428N05 gene	459	0.14	1	7 +/- 9	25 +/- 12
scl41127.15.1_23	Ddx52	ENSMUSG00000020677	DEAD (Asp-Glu-Ala-Asp) box polypeptide 52	459	0.14	1	23 +/- 12	24 +/- 12
scl0020088.2_249	Rps24	ENSMUSG00000025290	ribosomal protein S24	459	0.14	1	13 +/- 10	21 +/- 12
scl0056194.1_76	Prpf40a	ENSMUSG00000061136	PRP40 pre-mRNA processing factor 40 homolog A (yeast)	459	0.14	1	16 +/- 11	17 +/- 11
scl069790.3_16	Med30	ENSMUSG00000038622	mediator complex subunit 30	459	0.14	1	7 +/- 11	2 +/- 9
scl34988.19_284	Ash2l	ENSMUSG00000031575	ash2 (absent, small, or homeotic)-like (Drosophila)	459	0.14	1	17 +/- 11	11 +/- 11
scl068039.2_3	Nmb	ENSMUSG00000025723	neuromedin B	459	0.14	1	5 +/- 9	31 +/- 13
scl0018817.1_4	L06144	NA	NA	459	0.14	1	11 +/- 10	15 +/- 11
scl55015.6.1_13	Timp1	ENSMUSG00000001131	tissue inhibitor of metalloproteinase 1	459	0.14	1	9 +/- 10	18 +/- 12
scl40112.2.1_30	AK040705	NA	NA	459	0.14	1	12 +/- 10	27 +/- 12
scl31893.12.1_41	Lrrc56	ENSMUSG00000038637	leucine rich repeat containing 56	459	0.14	1	13 +/- 10	18 +/- 12
scl0003442.1_3	Tipin	ENSMUSG00000032397	timeless interacting protein	459	0.14	1	12 +/- 10	28 +/- 12
scl54439.8.1_27	Gata1	ENSMUSG00000031162	GATA binding protein 1	459	0.14	1	19 +/- 12	9 +/- 11
scl0003032.1_86	Pltp	ENSMUSG00000017754	phospholipid transfer protein	459	0.14	1	7 +/- 9	23 +/- 12
scl0235442.1_8	Rab8B	NA	NA	459	0.14	1	18 +/- 11	13 +/- 11
scl15775.18_113	Cenpf	ENSMUSG00000026605	centromere protein F	459	0.14	1	14 +/- 10	18 +/- 12
scl00320437.1_277	Cd247	ENSMUSG00000005763	CD247 antigen	459	0.14	1	16 +/- 11	16 +/- 12
scl0056709.2_63	Dnajb12	ENSMUSG00000020109	DnaJ (Hsp40) homolog, subfamily B, member 12	459	0.14	1	7 +/- 10	0 +/- 10
GI_6678536	V2r15	NA	NA	459	0.14	1	13 +/- 10	17 +/- 12
scl00215193.1_126	AA408296	NA	NA	459	0.14	1	16 +/- 11	20 +/- 12
scl43907.5.1_1	Lect2	ENSMUSG00000021539	leukocyte cell-derived chemotaxin 2	459	0.14	1	13 +/- 10	16 +/- 12
scl000845.1_3644	Dst	ENSMUSG00000103888	dystonin	459	0.14	1	17 +/- 11	14 +/- 11
scl0002544.1_87	Plec1	NA	NA	459	0.14	1	16 +/- 10	18 +/- 12
scl51269.7_133	Mapk4	ENSMUSG00000024558	mitogen-activated protein kinase 4	459	0.14	1	18 +/- 11	18 +/- 12
scl31124.24.1_96	Blm	ENSMUSG00000030528	Bloom syndrome, RecQ helicase-like	459	0.14	1	16 +/- 12	7 +/- 10
scl49902.3.1_5	AK006933	NA	NA	459	0.14	1	25 +/- 12	18 +/- 11
scl17695.4.1_211	Neu2	ENSMUSG00000079434	neuraminidase 2	459	0.14	1	18 +/- 11	28 +/- 13
scl0066830.2_105	Nacc1	ENSMUSG00000001910	nucleus accumbens associated 1, BEN and BTB (POZ) domain containing	459	0.14	1	16 +/- 12	1 +/- 9
scl068149.6_175	Otub2	ENSMUSG00000021203	OTU domain, ubiquitin aldehyde binding 2	459	0.14	1	9 +/- 11	0 +/- 10
scl50486.15.1_59	Vit	ENSMUSG00000024076	vitrin	459	0.14	1	7 +/- 11	2 +/- 9
scl21595.18_459	Ptbp2	ENSMUSG00000028134	polypyrimidine tract binding protein 2	459	0.14	1	14 +/- 10	21 +/- 11
scl0399569.1_107	C230071H18Rik	NA	NA	459	0.14	1	3 +/- 8	68 +/- 12
ri|1810047K05|ZX00043E03|AK007812|746	2810452K22Rik	NA	NA	459	0.14	1	13 +/- 11	1 +/- 10
scl23184.1.1_53	AK020412	NA	NA	459	0.14	1	3 +/- 8	63 +/- 12
ri|3110005M20|ZX00070F21|AK014004|1962	Srpk2	ENSMUSG00000062604	serine/arginine-rich protein specific kinase 2	459	0.14	1	4 +/- 10	13 +/- 10
scl075994.1_160	Mtap9	NA	NA	459	0.14	1	1 +/- 6	89 +/- 10
scl37657.36.1_139	Stab2	ENSMUSG00000035459	stabilin 2	459	0.15	1	3 +/- 8	67 +/- 12
scl41432.3.1_26	AK005116	NA	NA	459	0.15	1	15 +/- 11	53 +/- 12
scl0066125.2_261	Sf3b5	ENSMUSG00000078348	splicing factor 3b, subunit 5	459	0.15	1	8 +/- 9	57 +/- 13
scl34512.17_77	Brd7	ENSMUSG00000031660	bromodomain containing 7	459	0.15	1	15 +/- 11	28 +/- 11
scl21986.3.1_30	Apoa1bp	ENSMUSG00000028070	apolipoprotein A-I binding protein	459	0.15	1	11 +/- 10	47 +/- 12
scl0228714.3_276	Csrp2bp	ENSMUSG00000027425	cysteine and glycine-rich protein 2 binding protein	459	0.15	1	4 +/- 9	47 +/- 13
scl40034.27.1_30	Dnahc2	NA	NA	459	0.15	1	5 +/- 9	37 +/- 13
scl073032.2_11	Ttc9b	ENSMUSG00000007944	tetratricopeptide repeat domain 9B	459	0.15	1	18 +/- 11	29 +/- 12
scl0234875.1_259	Ttc13	ENSMUSG00000037300	tetratricopeptide repeat domain 13	459	0.15	1	7 +/- 9	28 +/- 12
scl16894.14.69_7	Prim2	ENSMUSG00000026134	DNA primase, p58 subunit	459	0.15	1	12 +/- 10	23 +/- 12
scl00230316.2_241	Megf9	ENSMUSG00000039270	multiple EGF-like-domains 9	459	0.15	1	10 +/- 10	27 +/- 12
scl51074.6_288	Lix1	ENSMUSG00000047786	limb expression 1 homolog (chicken)	459	0.15	1	9 +/- 10	25 +/- 12
scl067291.1_2	Ccdc137	ENSMUSG00000049957	coiled-coil domain containing 137	459	0.15	1	14 +/- 11	3 +/- 10
scl0001747.1_14	Dom3z	NA	NA	459	0.15	1	16 +/- 11	18 +/- 12
scl34312.7.1_89	Ctrb1	ENSMUSG00000031957	chymotrypsinogen B1	459	0.15	1	13 +/- 10	20 +/- 12
ri|A230024N07|PX00127C15|AK038524|2359	AK038736	NA	NA	459	0.15	1	10 +/- 10	22 +/- 12
scl52798.4.1_101	Nudt8	ENSMUSG00000024869	nudix (nucleoside diphosphate linked moiety X)-type motif 8	459	0.15	1	13 +/- 11	0 +/- 9
scl0110208.1_282	Pgd	ENSMUSG00000028961	phosphogluconate dehydrogenase	459	0.15	1	21 +/- 12	14 +/- 11
scl31342.5.1_38	Saa4	ENSMUSG00000040017	serum amyloid A 4	459	0.15	1	18 +/- 11	14 +/- 11
scl37046.4_393	Thy1	ENSMUSG00000032011	thymus cell antigen 1, theta	459	0.15	1	20 +/- 12	29 +/- 12
ri|4921532D18|PX00015A05|AK014994|2225	Nol8	ENSMUSG00000021392	nucleolar protein 8	459	0.15	1	10 +/- 10	20 +/- 12
scl19440.7.1_73	Cdk9	ENSMUSG00000009555	cyclin-dependent kinase 9 (CDC2-related kinase)	459	0.15	1	15 +/- 10	23 +/- 12
scl0244654.16_37	Mtss1l	ENSMUSG00000033763	metastasis suppressor 1-like	459	0.15	1	15 +/- 11	4 +/- 10
scl0329217.3_269	AK035520	NA	NA	459	0.15	1	16 +/- 11	20 +/- 12
scl018372.1_61	Olfr8	ENSMUSG00000094080	olfactory receptor 8	459	0.15	1	14 +/- 10	20 +/- 12
scl14351.1.1_75	C030014K22Rik	NA	NA	459	0.15	1	8 +/- 9	22 +/- 12
scl0003095.1_34	Prei4	NA	NA	459	0.15	1	21 +/- 12	12 +/- 11
GI_38076230	Rpl31	ENSMUSG00000073702	ribosomal protein L31	459	0.15	1	16 +/- 11	21 +/- 12
scl0077106.1_295	BC032285	NA	NA	459	0.15	1	7 +/- 11	9 +/- 9
GI_25030732	BU610071	NA	NA	459	0.15	1	14 +/- 11	7 +/- 11
scl44216.8_417	Btn1a1	ENSMUSG00000000706	butyrophilin, subfamily 1, member A1	459	0.15	1	15 +/- 10	19 +/- 12
scl022192.1_21	Ube2m	ENSMUSG00000005575	ubiquitin-conjugating enzyme E2M	459	0.15	1	20 +/- 12	9 +/- 11
scl39616.9.169_52	Nr1d1	ENSMUSG00000020889	nuclear receptor subfamily 1, group D, member 1	459	0.15	1	20 +/- 12	11 +/- 11
scl0014787.2_62	Rhpn1	ENSMUSG00000022580	rhophilin, Rho GTPase binding protein 1	459	0.15	1	17 +/- 11	20 +/- 12
scl36497.2.1_0	Tmem115	ENSMUSG00000010045	transmembrane protein 115	459	0.15	1	19 +/- 12	13 +/- 11
scl42385.21_636	Sos2	ENSMUSG00000034801	son of sevenless homolog 2 (Drosophila)	459	0.15	1	13 +/- 10	18 +/- 12
scl0103250.1_3	BG917177	NA	NA	459	0.15	1	13 +/- 10	25 +/- 12
scl26091.22.1_56	Acad10	ENSMUSG00000029456	acyl-Coenzyme A dehydrogenase family, member 10	459	0.15	1	15 +/- 11	21 +/- 12
scl41936.23.1_18	Wdr60	ENSMUSG00000042050	WD repeat domain 60	459	0.15	1	12 +/- 10	18 +/- 12
scl16731.18_613	Orc2l	NA	NA	459	0.15	1	11 +/- 10	16 +/- 12
scl31848.11_248	Dhcr7	ENSMUSG00000058454	7-dehydrocholesterol reductase	459	0.15	1	11 +/- 11	0 +/- 10
scl0003942.1_57	Os9	ENSMUSG00000040462	amplified in osteosarcoma	459	0.15	1	20 +/- 11	15 +/- 11
ri|2010011E17|ZX00057J21|AK008185|438	Robld3	NA	NA	459	0.15	1	16 +/- 11	4 +/- 10
scl53488.1.784_131	AK037427	NA	NA	459	0.15	1	16 +/- 12	8 +/- 10
scl47631.9.1_4	Creld2	ENSMUSG00000023272	cysteine-rich with EGF-like domains 2	459	0.15	1	17 +/- 12	21 +/- 11
scl41018.11_650	Samd14	ENSMUSG00000047181	sterile alpha motif domain containing 14	459	0.15	1	7 +/- 11	1 +/- 9
scl36783.2.1_280	Fam148b	NA	NA	459	0.16	1	4 +/- 9	56 +/- 12
scl29467.5.1_148	Clec2d	ENSMUSG00000030157	C-type lectin domain family 2, member d	459	0.16	1	14 +/- 11	43 +/- 13
scl0208715.1_140	Hmgcs1	ENSMUSG00000093930	3-hydroxy-3-methylglutaryl-Coenzyme A synthase 1	459	0.16	1	6 +/- 9	28 +/- 12
scl0072812.1_330	AK013375	NA	NA	459	0.16	1	9 +/- 9	60 +/- 12
scl019736.1_86	Rgs4	ENSMUSG00000038530	regulator of G-protein signaling 4	459	0.16	1	22 +/- 12	27 +/- 12
scl066069.9_217	Snupn	ENSMUSG00000055334	snurportin 1	459	0.16	1	18 +/- 11	9 +/- 10
scl25152.5.1_78	Magoh	ENSMUSG00000028609	mago-nashi homolog, proliferation-associated (Drosophila)	459	0.16	1	11 +/- 10	33 +/- 13
GI_20878323	Ube2d3	ENSMUSG00000078578	ubiquitin-conjugating enzyme E2D 3	459	0.16	1	21 +/- 12	19 +/- 12
scl0075219.2_3	Dusp18	ENSMUSG00000047205	dual specificity phosphatase 18	459	0.16	1	10 +/- 10	21 +/- 12
scl067337.2_19	Cstf1	ENSMUSG00000027498	cleavage stimulation factor, 3' pre-RNA, subunit 1	459	0.16	1	20 +/- 12	10 +/- 11
scl53123.9.6_1	Zdhhc16	ENSMUSG00000025157	zinc finger, DHHC domain containing 16	459	0.16	1	13 +/- 11	18 +/- 11
scl00246710.1_261	Rhobtb2	ENSMUSG00000022075	Rho-related BTB domain containing 2	459	0.16	1	10 +/- 10	24 +/- 12
scl23919.20.1_50	BC059842	NA	NA	459	0.16	1	8 +/- 9	19 +/- 12
scl0001956.1_0	Elf2	ENSMUSG00000037174	E74-like factor 2	459	0.16	1	18 +/- 12	17 +/- 11
scl022041.3_13	Trf	ENSMUSG00000032554	transferrin	459	0.16	1	6 +/- 9	22 +/- 12
scl28804.3_1	Wbp1	ENSMUSG00000030035	WW domain binding protein 1	459	0.16	1	9 +/- 9	24 +/- 12
scl31324.2.1_106	Mrgprb2	ENSMUSG00000050425	MAS-related GPR, member B2	459	0.16	1	11 +/- 10	19 +/- 12
scl31568.26.194_22	Actn4	ENSMUSG00000054808	actinin alpha 4	459	0.16	1	12 +/- 10	22 +/- 12
scl000703.1_52	CLCN3	NA	NA	459	0.16	1	14 +/- 11	20 +/- 12
scl014693.1_109	Gnb2	ENSMUSG00000029713	guanine nucleotide binding protein (G protein), beta 2	459	0.16	1	19 +/- 12	7 +/- 10
scl0002579.1_44	Hoxc6	ENSMUSG00000001661	homeobox C6	459	0.16	1	12 +/- 10	19 +/- 12
scl17364.2.1125_22	AK015565	NA	NA	459	0.16	1	16 +/- 11	18 +/- 12
scl0056417.2_229	Adar	ENSMUSG00000027951	adenosine deaminase, RNA-specific	459	0.16	1	19 +/- 12	7 +/- 10
scl0003607.1_28	Tmed1	ENSMUSG00000032180	transmembrane emp24 domain containing 1	459	0.16	1	13 +/- 10	15 +/- 11
scl000120.1_12	Scn1b	ENSMUSG00000019194	sodium channel, voltage-gated, type I, beta	459	0.16	1	15 +/- 11	5 +/- 10
scl30229.21.1_176	4921528H16Rik	NA	NA	459	0.16	1	11 +/- 10	20 +/- 12
scl7469.1.1_188	AK009140	NA	NA	459	0.16	1	9 +/- 10	17 +/- 11
scl0003800.1_141	Tfam	ENSMUSG00000003923	transcription factor A, mitochondrial	459	0.16	1	6 +/- 10	0 +/- 10
scl48728.3.1_20	Fam128b	NA	NA	459	0.16	1	8 +/- 10	18 +/- 12
scl42028.9_457	Xrcc3	ENSMUSG00000021287	X-ray repair complementing defective repair in Chinese hamster cells 3	459	0.16	1	17 +/- 11	14 +/- 11
scl8800.1.1_230	AK006140	NA	NA	459	0.16	1	19 +/- 11	20 +/- 12
scl15769.9_635	Vash2	ENSMUSG00000037568	vasohibin 2	459	0.16	1	6 +/- 9	26 +/- 12
scl20039.1_29	Ergic3	ENSMUSG00000005881	ERGIC and golgi 3	459	0.16	1	12 +/- 10	24 +/- 12
scl0101199.6_11	Zfp429	ENSMUSG00000078994	zinc finger protein 429	459	0.16	1	12 +/- 10	21 +/- 12
scl41300.23_511	Atp2a3	ENSMUSG00000020788	ATPase, Ca++ transporting, ubiquitous	459	0.16	1	21 +/- 12	5 +/- 10
scl32923.6.1_33	Exosc5	ENSMUSG00000061286	exosome component 5	459	0.16	1	11 +/- 11	1 +/- 10
scl0069938.1_155	Scrn1	ENSMUSG00000019124	secernin 1	459	0.16	1	14 +/- 10	24 +/- 12
scl32114.1_221	AK037231	NA	NA	459	0.16	1	10 +/- 11	0 +/- 10
GI_38090333	Gm684	ENSMUSG00000079559	predicted gene 684	459	0.16	1	5 +/- 10	0 +/- 10
scl29346.9.1_7	Mrps35	ENSMUSG00000040112	mitochondrial ribosomal protein S35	459	0.16	1	12 +/- 11	1 +/- 10
scl41823.30_613	Egfr	ENSMUSG00000020122	epidermal growth factor receptor	459	0.16	1	13 +/- 10	14 +/- 11
scl0001190.1_3	Clec1a	ENSMUSG00000033082	C-type lectin domain family 1, member a	459	0.16	1	5 +/- 10	1 +/- 10
scl54667.16_146	Chm	ENSMUSG00000025531	choroidermia (RAB escort protein 1)	459	0.16	1	8 +/- 9	21 +/- 12
scl022289.28_11	Kdm6a	ENSMUSG00000037369	lysine (K)-specific demethylase 6A	459	0.16	1	8 +/- 9	14 +/- 9
scl069700.1_259	Col22a1	ENSMUSG00000079022	collagen, type XXII, alpha 1	459	0.16	1	14 +/- 12	3 +/- 9
ri|2600015M20|ZX00060F21|AK011220|503	Tsn	ENSMUSG00000026374	translin	459	0.16	1	6 +/- 9	27 +/- 12
scl066812.1_16	Ppcdc	ENSMUSG00000063849	phosphopantothenoylcysteine decarboxylase	459	0.16	1	9 +/- 10	24 +/- 11
scl000643.1_49	Nup133	ENSMUSG00000039509	nucleoporin 133	459	0.16	1	4 +/- 10	10 +/- 10
scl27696.10_114	Srd5a3	ENSMUSG00000029233	steroid 5 alpha-reductase 3	459	0.16	1	6 +/- 10	6 +/- 10
scl078495.2_180	AK051928	NA	NA	459	0.16	1	2 +/- 6	96 +/- 8
scl071329.1_77	5830417I10Rik	ENSMUSG00000078684	RIKEN cDNA 5830417I10 gene	459	0.17	1	5 +/- 9	30 +/- 12
scl30978.11_3	Plekhb1	ENSMUSG00000030701	pleckstrin homology domain containing, family B (evectins) member 1	459	0.17	1	5 +/- 9	34 +/- 13
scl25859.15.1_31	Taf6	ENSMUSG00000036980	TAF6 RNA polymerase II, TATA box binding protein (TBP)-associated factor	459	0.17	1	9 +/- 9	31 +/- 13
scl50762.2_0	Ier3	ENSMUSG00000003541	immediate early response 3	459	0.17	1	10 +/- 10	34 +/- 13
scl014406.1_194	Gabrg2	ENSMUSG00000020436	gamma-aminobutyric acid (GABA) A receptor, subunit gamma 2	459	0.17	1	18 +/- 12	23 +/- 12
scl012919.2_18	Crhbp	ENSMUSG00000021680	corticotropin releasing hormone binding protein	459	0.17	1	14 +/- 11	46 +/- 13
scl47395.9.8_1	Bxdc2	NA	NA	459	0.17	1	23 +/- 13	14 +/- 11
scl013800.1_217	Enah	ENSMUSG00000022995	enabled homolog (Drosophila)	459	0.17	1	7 +/- 10	31 +/- 13
scl074161.3_29	AK079954	NA	NA	459	0.17	1	14 +/- 10	21 +/- 12
scl53365.18.1_112	Prpf19	ENSMUSG00000024735	PRP19/PSO4 pre-mRNA processing factor 19 homolog (S. cerevisiae)	459	0.17	1	13 +/- 11	7 +/- 10
scl34474.17.1_135	Bbs2	ENSMUSG00000031755	Bardet-Biedl syndrome 2 (human)	459	0.17	1	15 +/- 11	17 +/- 11
scl42876.19.1_3	Tdp1	ENSMUSG00000021177	tyrosyl-DNA phosphodiesterase 1	459	0.17	1	7 +/- 9	20 +/- 12
scl29361.1.617_238	AK052090	NA	NA	459	0.17	1	17 +/- 11	13 +/- 11
scl16886.1.319_8	Ccdc115	ENSMUSG00000042111	coiled-coil domain containing 115	459	0.17	1	15 +/- 12	3 +/- 10
scl0228662.5_115	Btbd3	ENSMUSG00000062098	BTB (POZ) domain containing 3	459	0.17	1	17 +/- 11	16 +/- 12
scl0014567.2_263	Gdi1	ENSMUSG00000015291	guanosine diphosphate (GDP) dissociation inhibitor 1	459	0.17	1	11 +/- 11	2 +/- 10
scl0017765.2_254	Mtf2	ENSMUSG00000029267	metal response element binding transcription factor 2	459	0.17	1	17 +/- 12	18 +/- 12
scl067410.1_250	4930449I24Rik	ENSMUSG00000079093	RIKEN cDNA 4930449I24 gene	459	0.17	1	12 +/- 10	19 +/- 12
scl068476.1_276	Lias	ENSMUSG00000029199	lipoic acid synthetase	459	0.17	1	12 +/- 11	3 +/- 10
scl32104.13.1_7	Scnn1b	ENSMUSG00000030873	sodium channel, nonvoltage-gated 1 beta	459	0.17	1	9 +/- 10	23 +/- 12
scl0003682.1_25	Slc35b3	ENSMUSG00000021432	solute carrier family 35, member B3	459	0.17	1	16 +/- 11	17 +/- 12
scl51108.6.3_0	Sod2	ENSMUSG00000006818	superoxide dismutase 2, mitochondrial	459	0.17	1	16 +/- 11	9 +/- 11
scl33241.10_186	Irf8	ENSMUSG00000041515	interferon regulatory factor 8	459	0.17	1	13 +/- 10	14 +/- 11
scl29198.15_4	Tsga14	NA	NA	459	0.17	1	11 +/- 10	19 +/- 12
scl25865.13.1_251	Cyp3a13	ENSMUSG00000029727	cytochrome P450, family 3, subfamily a, polypeptide 13	459	0.17	1	10 +/- 11	1 +/- 10
scl00023.1_1	Cyp2a5	ENSMUSG00000005547	cytochrome P450, family 2, subfamily a, polypeptide 5	459	0.17	1	14 +/- 10	21 +/- 12
scl071857.8_116	Slc17a9	ENSMUSG00000023393	solute carrier family 17, member 9	459	0.17	1	10 +/- 10	16 +/- 12
scl31913.1.1_45	Olfr61	ENSMUSG00000096069	olfactory receptor 61	459	0.17	1	14 +/- 11	14 +/- 11
scl012268.18_2	C4b	ENSMUSG00000073418	complement component 4B (Chido blood group)	459	0.17	1	16 +/- 11	15 +/- 11
ri|A430104A14|PX00064F04|AK040502|3842	AK040502	NA	NA	459	0.17	1	15 +/- 11	9 +/- 11
scl054214.31_157	Golga4	ENSMUSG00000038708	golgi autoantigen, golgin subfamily a, 4	459	0.17	1	20 +/- 11	18 +/- 12
scl0258649.1_47	Olfr441	ENSMUSG00000094669	olfactory receptor 441	459	0.17	1	12 +/- 11	3 +/- 10
GI_38081996	D5Ertd577e	ENSMUSG00000070677	DNA segment, Chr 5, ERATO Doi 577, expressed	459	0.17	1	17 +/- 11	18 +/- 12
scl35140.2_153	Ctxn1	ENSMUSG00000048644	cortexin 1	459	0.17	1	15 +/- 11	3 +/- 10
scl027643.2_36	Ubl4	NA	NA	459	0.17	1	17 +/- 11	14 +/- 11
scl0013909.2_193	EG13909	NA	NA	459	0.17	1	9 +/- 10	17 +/- 12
scl0004080.1_2	Idua	ENSMUSG00000033540	iduronidase, alpha-L-	459	0.17	1	20 +/- 11	20 +/- 12
scl0093699.1_40	Pcdhga2	ENSMUSG00000103332	protocadherin gamma subfamily A, 2	459	0.17	1	18 +/- 12	9 +/- 11
GI_38077769	BC050868	NA	NA	459	0.17	1	13 +/- 11	2 +/- 10
GI_38076499	Nbea	ENSMUSG00000027799	neurobeachin	459	0.17	1	12 +/- 11	1 +/- 10
scl0052502.1_65	Carhsp1	ENSMUSG00000008393	calcium regulated heat stable protein 1	459	0.17	1	11 +/- 11	1 +/- 10
scl48380.16.1_85	Gpr128	NA	NA	459	0.17	1	15 +/- 11	14 +/- 11
scl43245.1.1_35	Immp2l	ENSMUSG00000056899	IMP2 inner mitochondrial membrane peptidase-like (S. cerevisiae)	459	0.17	1	12 +/- 11	4 +/- 10
scl0002012.1_0	Dclk1	ENSMUSG00000027797	doublecortin-like kinase 1	459	0.17	1	10 +/- 11	0 +/- 9
scl066079.4_60	Tmem42	ENSMUSG00000066233	transmembrane protein 42	459	0.17	1	17 +/- 11	13 +/- 11
scl012308.1_237	Calb2	ENSMUSG00000003657	calbindin 2	459	0.17	1	7 +/- 11	1 +/- 9
scl43291.3.1_16	Twist1	ENSMUSG00000035799	twist basic helix-loop-helix transcription factor 1	459	0.17	1	8 +/- 11	1 +/- 10
ri|9430068D06|PX00109P12|AK020478|1151	AK044933	NA	NA	459	0.17	1	12 +/- 10	24 +/- 12
scl17463.8_535	Etnk2	ENSMUSG00000070644	ethanolamine kinase 2	459	0.17	1	3 +/- 9	46 +/- 13
scl28293.6.1_86	Hebp1	ENSMUSG00000042770	heme binding protein 1	459	0.17	1	12 +/- 11	12 +/- 10
GI_38094076	Ppp2r3a	ENSMUSG00000043154	protein phosphatase 2, regulatory subunit B'', alpha	459	0.17	1	4 +/- 10	5 +/- 10
ri|A230046B11|PX00127J11|AK038580|3132	Lrp8	ENSMUSG00000028613	low density lipoprotein receptor-related protein 8, apolipoprotein e receptor	459	0.18	1	14 +/- 11	34 +/- 13
scl50777.5_28	Atp6v1g2	ENSMUSG00000024403	ATPase, H+ transporting, lysosomal V1 subunit G2	459	0.18	1	4 +/- 9	42 +/- 13
scl067072.6_68	Cdc37l1	ENSMUSG00000024780	cell division cycle 37-like 1	459	0.18	1	8 +/- 10	24 +/- 11
scl54578.51_466	Col4a5	ENSMUSG00000031274	collagen, type IV, alpha 5	459	0.18	1	5 +/- 9	31 +/- 13
scl39513.1.1_263	Ubtf	ENSMUSG00000020923	upstream binding transcription factor, RNA polymerase I	459	0.18	1	6 +/- 9	41 +/- 13
GI_33469082	Kif1b	ENSMUSG00000063077	kinesin family member 1B	459	0.18	1	20 +/- 12	16 +/- 11
scl067933.1_19	Hcfc2	ENSMUSG00000020246	host cell factor C2	459	0.18	1	8 +/- 10	23 +/- 12
scl000146.1_5	Snrpa1	ENSMUSG00000030512	small nuclear ribonucleoprotein polypeptide A'	459	0.18	1	16 +/- 11	6 +/- 10
scl39313.1.1740_274	Evpl	ENSMUSG00000034282	envoplakin	459	0.18	1	8 +/- 9	29 +/- 13
ri|2810401C16|ZX00046G18|AK012958|1791	Aifm3	ENSMUSG00000022763	apoptosis-inducing factor, mitochondrion-associated 3	459	0.18	1	16 +/- 11	21 +/- 12
scl28417.13.1_3	Leprel2	NA	NA	459	0.18	1	17 +/- 12	9 +/- 11
scl00225215.1_56	BC003885	NA	NA	459	0.18	1	17 +/- 11	23 +/- 12
scl46496.6.1_3	Tnnc1	ENSMUSG00000091898	troponin C, cardiac/slow skeletal	459	0.18	1	13 +/- 11	14 +/- 11
scl069604.4_12	Elk4	ENSMUSG00000026436	ELK4, member of ETS oncogene family	459	0.18	1	15 +/- 11	16 +/- 11
scl30414.18.1_38	Dync1i1	ENSMUSG00000029757	dynein cytoplasmic 1 intermediate chain 1	459	0.18	1	13 +/- 10	21 +/- 12
scl49773.2_28	Lrg1	ENSMUSG00000037095	leucine-rich alpha-2-glycoprotein 1	459	0.18	1	19 +/- 12	24 +/- 12
scl056480.1_127	Tbk1	ENSMUSG00000020115	TANK-binding kinase 1	459	0.18	1	19 +/- 12	16 +/- 11
scl074676.2_114	AK015472	NA	NA	459	0.18	1	8 +/- 9	19 +/- 12
scl32017.13_179	Fbxl19	ENSMUSG00000030811	F-box and leucine-rich repeat protein 19	459	0.18	1	13 +/- 10	27 +/- 12
ri|D030032D21|PX00179L11|AK083499|1252	Huwe1	ENSMUSG00000025261	HECT, UBA and WWE domain containing 1	459	0.18	1	12 +/- 10	19 +/- 12
scl013531.1_184	Dub1	NA	NA	459	0.18	1	10 +/- 10	19 +/- 12
scl22157.4_24	Rfxap	ENSMUSG00000036615	regulatory factor X-associated protein	459	0.18	1	18 +/- 11	12 +/- 11
scl24135.1.1_194	Gdap6	NA	NA	459	0.18	1	15 +/- 11	13 +/- 11
scl48783.2_107	AK013859	NA	NA	459	0.18	1	14 +/- 10	19 +/- 12
scl068453.4_14	Gpihbp1	ENSMUSG00000022579	GPI-anchored HDL-binding protein 1	459	0.18	1	18 +/- 11	17 +/- 12
scl26066.7.1_28	Rhof	ENSMUSG00000029449	ras homolog gene family, member f	459	0.18	1	14 +/- 10	17 +/- 12
scl056398.1_30	1500003O03Rik	NA	NA	459	0.18	1	19 +/- 11	17 +/- 11
GI_38085440		ENSMUSG00000106534	NA	459	0.18	1	14 +/- 10	15 +/- 11
scl0023879.2_268	Fxr2	ENSMUSG00000018765	fragile X mental retardation, autosomal homolog 2	459	0.18	1	17 +/- 11	16 +/- 11
scl0070896.1_134	4933402N22Rik	ENSMUSG00000067848	RIKEN cDNA 4933402N22 gene	459	0.18	1	18 +/- 11	13 +/- 11
scl0003827.1_21	Ppp1r12a	ENSMUSG00000019907	protein phosphatase 1, regulatory (inhibitor) subunit 12A	459	0.18	1	7 +/- 11	0 +/- 10
scl0319240.2_329	AK034152	NA	NA	459	0.18	1	16 +/- 11	7 +/- 10
scl00228662.1_125	Btbd3	ENSMUSG00000062098	BTB (POZ) domain containing 3	459	0.18	1	18 +/- 11	13 +/- 11
scl0003006.1_310	Fbxo3	ENSMUSG00000027180	F-box protein 3	459	0.18	1	18 +/- 12	16 +/- 11
scl00231327.1_147	Ppat	ENSMUSG00000029246	phosphoribosyl pyrophosphate amidotransferase	459	0.18	1	12 +/- 10	21 +/- 11
scl32816.11.1_261	Nfkbid	ENSMUSG00000036931	nuclear factor of kappa light polypeptide gene enhancer in B cells inhibitor, delta	459	0.18	1	8 +/- 10	1 +/- 10
scl0003190.1_15	Cdk5rap1	ENSMUSG00000027487	CDK5 regulatory subunit associated protein 1	459	0.18	1	11 +/- 10	36 +/- 11
scl50828.7.1_115	Psmb8	ENSMUSG00000024338	proteasome (prosome, macropain) subunit, beta type 8 (large multifunctional peptidase 7)	459	0.18	1	13 +/- 12	1 +/- 9
scl066922.3_13	Rras2	ENSMUSG00000055723	related RAS viral (r-ras) oncogene homolog 2	459	0.18	1	7 +/- 11	0 +/- 9
scl48021.6_11	Dap	ENSMUSG00000039168	death-associated protein	459	0.18	1	3 +/- 9	31 +/- 12
scl43094.11.1_246	Syt16	ENSMUSG00000044912	synaptotagmin XVI	459	0.18	1	5 +/- 10	6 +/- 10
scl27439.5.1_39	AK041600	NA	NA	459	0.18	1	4 +/- 10	7 +/- 10
scl016988.2_22	Lst1	ENSMUSG00000073412	leukocyte specific transcript 1	459	0.19	1	2 +/- 7	85 +/- 10
ri|A130091L04|PX00125B04|AK038273|1572	AK038273	NA	NA	459	0.19	1	4 +/- 7	88 +/- 10
scl000628.1_299	Arl2bp	ENSMUSG00000031776	ADP-ribosylation factor-like 2 binding protein	459	0.19	1	13 +/- 10	44 +/- 10
scl16664.9_588	Lancl1	ENSMUSG00000026000	LanC (bacterial lantibiotic synthetase component C)-like 1	459	0.19	1	2 +/- 8	61 +/- 12
scl00210673.2_290	Prrt3	ENSMUSG00000045009	proline-rich transmembrane protein 3	459	0.19	1	12 +/- 10	30 +/- 13
scl0050527.2_55	Ero1l	ENSMUSG00000021831	ERO1-like (S. cerevisiae)	459	0.19	1	10 +/- 10	30 +/- 13
scl072465.7_112	Zfp131	ENSMUSG00000094870	zinc finger protein 131	459	0.19	1	12 +/- 11	12 +/- 10
ri|4833429F02|PX00028J04|AK029395|818	Gle1l	NA	NA	459	0.19	1	8 +/- 11	4 +/- 10
scl46205.12_632	AK164078	NA	NA	459	0.19	1	4 +/- 9	43 +/- 13
scl18731.9_1	Cep152	ENSMUSG00000068394	centrosomal protein 152	459	0.19	1	12 +/- 10	23 +/- 12
scl069709.2_18	BC067010	NA	NA	459	0.19	1	11 +/- 10	25 +/- 12
scl36760.13.1_118	Anxa2	ENSMUSG00000032231	annexin A2	459	0.19	1	7 +/- 10	1 +/- 10
GI_38075370	Ndufs6	ENSMUSG00000021606	NADH dehydrogenase (ubiquinone) Fe-S protein 6	459	0.19	1	11 +/- 10	22 +/- 12
scl23644.1.293_8	AK012993	NA	NA	459	0.19	1	16 +/- 11	11 +/- 11
scl000989.1_15	Clk1	ENSMUSG00000026034	CDC-like kinase 1	459	0.19	1	15 +/- 11	15 +/- 11
scl056070.7_28	Tcerg1	ENSMUSG00000024498	transcription elongation regulator 1 (CA150)	459	0.19	1	17 +/- 11	15 +/- 11
scl019223.1_1	Ptgis	ENSMUSG00000017969	prostaglandin I2 (prostacyclin) synthase	459	0.19	1	18 +/- 11	14 +/- 11
scl24051.10_612	Slc35d1	ENSMUSG00000028521	solute carrier family 35 (UDP-glucuronic acid/UDP-N-acetylgalactosamine dual transporter), member D1	459	0.19	1	7 +/- 10	24 +/- 12
scl28100.26.1_27	Pclo	ENSMUSG00000061601	piccolo (presynaptic cytomatrix protein)	459	0.19	1	8 +/- 10	28 +/- 12
scl19526.9_575	Inpp5e	ENSMUSG00000026925	inositol polyphosphate-5-phosphatase E	459	0.19	1	5 +/- 9	25 +/- 12
scl27538.6.1001_4	Cops4	ENSMUSG00000035297	COP9 (constitutive photomorphogenic) homolog, subunit 4 (Arabidopsis thaliana)	459	0.19	1	8 +/- 11	0 +/- 10
scl25806.10.1_16	Zdhhc4	ENSMUSG00000001844	zinc finger, DHHC domain containing 4	459	0.19	1	17 +/- 11	20 +/- 11
scl0083602.1_4	Gtf2a1	ENSMUSG00000020962	general transcription factor II A, 1	459	0.19	1	11 +/- 10	18 +/- 12
scl16681.2_394	Fzd5	ENSMUSG00000045005	frizzled homolog 5 (Drosophila)	459	0.19	1	14 +/- 11	4 +/- 10
scl30268.11_576	Klhdc10	ENSMUSG00000029775	kelch domain containing 10	459	0.19	1	13 +/- 11	5 +/- 10
scl46282.36.1_17	Lrrc16b	ENSMUSG00000022211	leucine rich repeat containing 16B	459	0.19	1	18 +/- 11	18 +/- 12
scl35643.12.1_48	Lipc	ENSMUSG00000032207	lipase, hepatic	459	0.19	1	16 +/- 10	22 +/- 12
scl0094215.2_95	Ugt2a1	ENSMUSG00000106677	UDP glucuronosyltransferase 2 family, polypeptide A1	459	0.19	1	15 +/- 11	14 +/- 11
scl35480.11_267	AK035037	NA	NA	459	0.19	1	16 +/- 11	10 +/- 11
scl0001801.1_3	Pigp	ENSMUSG00000022940	phosphatidylinositol glycan anchor biosynthesis, class P	459	0.19	1	20 +/- 12	7 +/- 10
scl0269204.10_29	Mtap2	NA	NA	459	0.19	1	15 +/- 10	18 +/- 12
scl000190.1_325	Taok2	ENSMUSG00000059981	TAO kinase 2	459	0.19	1	10 +/- 10	20 +/- 12
scl0004050.1_49	Ube3b	ENSMUSG00000029577	ubiquitin protein ligase E3B	459	0.19	1	16 +/- 11	18 +/- 12
scl094090.1_3	Trim9	ENSMUSG00000021071	tripartite motif-containing 9	459	0.19	1	15 +/- 10	23 +/- 12
scl18227.6.1_62	Gata5	ENSMUSG00000015627	GATA binding protein 5	459	0.19	1	16 +/- 11	15 +/- 11
GI_38077458	Taf2	ENSMUSG00000037343	TAF2 RNA polymerase II, TATA box binding protein (TBP)-associated factor	459	0.19	1	13 +/- 10	18 +/- 12
scl0001622.1_78	Col11a2	ENSMUSG00000024330	collagen, type XI, alpha 2	459	0.19	1	20 +/- 11	18 +/- 12
scl000409.1_39	Ednrb	ENSMUSG00000022122	endothelin receptor type B	459	0.19	1	14 +/- 10	16 +/- 11
scl29824.1.5_102	Npm3	ENSMUSG00000056209	nucleoplasmin 3	459	0.19	1	15 +/- 11	14 +/- 11
scl51145.31.1_12	Pde10a	ENSMUSG00000023868	phosphodiesterase 10A	459	0.19	1	13 +/- 11	5 +/- 10
scl069876.1_90	Thap3	ENSMUSG00000039759	THAP domain containing, apoptosis associated protein 3	459	0.19	1	16 +/- 11	15 +/- 11
scl51561.2_128	AK015461	NA	NA	459	0.19	1	9 +/- 9	20 +/- 12
scl16508.16.1_213	Ngef	ENSMUSG00000026259	neuronal guanine nucleotide exchange factor	459	0.19	1	10 +/- 10	20 +/- 12
scl35689.10_226	Plekho2	ENSMUSG00000050721	pleckstrin homology domain containing, family O member 2	459	0.19	1	12 +/- 10	21 +/- 12
GI_38090520	Rps6	ENSMUSG00000028495	ribosomal protein S6	459	0.19	1	8 +/- 9	26 +/- 12
scl022256.8_10	Ung	ENSMUSG00000029591	uracil DNA glycosylase	459	0.19	1	9 +/- 9	23 +/- 12
scl49381.3_117	Hic2	ENSMUSG00000050240	hypermethylated in cancer 2	459	0.19	1	14 +/- 11	2 +/- 10
scl013238.1_31	Defa20	ENSMUSG00000095066	defensin, alpha, 20	459	0.19	1	13 +/- 11	9 +/- 11
scl29649.6.1_19	Lmcd1	ENSMUSG00000057604	LIM and cysteine-rich domains 1	459	0.19	1	15 +/- 11	25 +/- 12
scl19499.9.1_0	Fcnb	ENSMUSG00000026835	ficolin B	459	0.19	1	8 +/- 11	0 +/- 9
scl00230648.1_86	4732418C07Rik	NA	NA	459	0.19	1	13 +/- 11	11 +/- 11
scl45060.6_526	Gng4	ENSMUSG00000021303	guanine nucleotide binding protein (G protein), gamma 4	459	0.19	1	6 +/- 9	36 +/- 13
scl0101543.1_246	Wtip	ENSMUSG00000036459	WT1-interacting protein	459	0.19	1	5 +/- 10	16 +/- 10
scl011639.5_169	Ak3l1	NA	NA	459	0.19	1	14 +/- 12	11 +/- 10
scl47060.10.1_13	Naprt1	NA	NA	459	0.19	1	5 +/- 10	3 +/- 9
ri|B130050B18|PX00158H09|AK045237|2884	AK045237	NA	NA	459	0.19	1	3 +/- 10	13 +/- 10
scl36676.10.87_5	Mto1	ENSMUSG00000032342	mitochondrial translation optimization 1 homolog (S. cerevisiae)	459	0.2	1	14 +/- 11	40 +/- 13
scl33899.1.1_293	AK019402	NA	NA	459	0.2	1	6 +/- 9	34 +/- 13
ri|A030012J18|PX00063H17|AK037239|1862	Bpgm	ENSMUSG00000038871	2,3-bisphosphoglycerate mutase	459	0.2	1	16 +/- 12	15 +/- 11
GI_37674262	Gats	NA	NA	459	0.2	1	7 +/- 9	32 +/- 13
scl073316.1_23	Calr3	ENSMUSG00000019732	calreticulin 3	459	0.2	1	6 +/- 10	2 +/- 10
scl0216767.5_8	Mrpl22	ENSMUSG00000020514	mitochondrial ribosomal protein L22	459	0.2	1	8 +/- 10	24 +/- 12
scl46782.29_11	Hdac7	ENSMUSG00000022475	histone deacetylase 7	459	0.2	1	8 +/- 10	27 +/- 12
scl0269955.3_29	Rccd1	ENSMUSG00000038930	RCC1 domain containing 1	459	0.2	1	5 +/- 9	21 +/- 12
scl12133.1.1_16	AK003980	NA	NA	459	0.2	1	13 +/- 11	5 +/- 10
GI_30061350	Hist1h4j	ENSMUSG00000067455	histone cluster 1, H4j	459	0.2	1	5 +/- 9	23 +/- 12
GI_38049457	Cog5	ENSMUSG00000035933	component of oligomeric golgi complex 5	459	0.2	1	13 +/- 10	22 +/- 12
scl0106919.1_30	DQ553245	NA	NA	459	0.2	1	19 +/- 11	20 +/- 12
scl00232946.2_300	Bloc1s3	ENSMUSG00000057667	biogenesis of lysosomal organelles complex-1, subunit 3	459	0.2	1	12 +/- 9	35 +/- 13
scl28891.9_444	Rpia	ENSMUSG00000053604	ribose 5-phosphate isomerase A	459	0.2	1	8 +/- 10	23 +/- 12
scl0001632.1_8	Psmb8	ENSMUSG00000024338	proteasome (prosome, macropain) subunit, beta type 8 (large multifunctional peptidase 7)	459	0.2	1	18 +/- 12	19 +/- 12
scl0108657.5_28	Rnpepl1	ENSMUSG00000026269	arginyl aminopeptidase (aminopeptidase B)-like 1	459	0.2	1	7 +/- 9	26 +/- 12
scl48912.5_69	Hemk2	NA	NA	459	0.2	1	17 +/- 11	15 +/- 11
scl19399.8_192	Stom	ENSMUSG00000026880	stomatin	459	0.2	1	14 +/- 11	23 +/- 12
scl0012226.2_9	Btg1	ENSMUSG00000036478	B cell translocation gene 1, anti-proliferative	459	0.2	1	16 +/- 11	28 +/- 12
scl0327942.7_271	Pigl	ENSMUSG00000014245	phosphatidylinositol glycan anchor biosynthesis, class L	459	0.2	1	7 +/- 9	19 +/- 12
scl23605.18.1_327	Padi1	ENSMUSG00000025329	peptidyl arginine deiminase, type I	459	0.2	1	18 +/- 11	12 +/- 11
scl020168.1_23	Rtn3	ENSMUSG00000024758	reticulon 3	459	0.2	1	7 +/- 9	22 +/- 12
scl00105935.2_195	Prlr	ENSMUSG00000005268	prolactin receptor	459	0.2	1	12 +/- 10	18 +/- 12
scl0022193.2_31	Ube2e3	ENSMUSG00000027011	ubiquitin-conjugating enzyme E2E 3	459	0.2	1	12 +/- 10	24 +/- 12
scl43280.11_443	Ankmy2	ENSMUSG00000036188	ankyrin repeat and MYND domain containing 2	459	0.2	1	21 +/- 12	15 +/- 11
scl0018569.1_4	Pdcd4	ENSMUSG00000024975	programmed cell death 4	459	0.2	1	11 +/- 10	18 +/- 11
scl49430.3_297	Snn	ENSMUSG00000037972	stannin	459	0.2	1	9 +/- 11	1 +/- 9
scl022751.4_4	Zfp90	ENSMUSG00000031907	zinc finger protein 90	459	0.2	1	5 +/- 9	29 +/- 12
scl0259123.1_221	Olfr632	ENSMUSG00000073938	olfactory receptor 632	459	0.2	1	9 +/- 10	17 +/- 11
scl0015387.1_0	Hnrnpk	ENSMUSG00000021546	heterogeneous nuclear ribonucleoprotein K	459	0.2	1	13 +/- 10	14 +/- 11
scl015260.11_119	Hira	ENSMUSG00000022702	histone cell cycle regulation defective homolog A (S. cerevisiae)	459	0.2	1	7 +/- 9	20 +/- 12
scl018141.7_103	Nup50	ENSMUSG00000016619	nucleoporin 50	459	0.2	1	6 +/- 9	21 +/- 12
scl19342.9_165	AK046859	NA	NA	459	0.2	1	9 +/- 9	28 +/- 12
scl0213673.3_37	9530068E07Rik	ENSMUSG00000036275	RIKEN cDNA 9530068E07 gene	459	0.2	1	18 +/- 11	12 +/- 11
scl35076.15.1_19	Gas6	ENSMUSG00000031451	growth arrest specific 6	459	0.2	1	14 +/- 10	21 +/- 12
scl47856.20_571	Phf20l1	ENSMUSG00000072501	PHD finger protein 20-like 1	459	0.2	1	9 +/- 10	23 +/- 12
scl0003961.1_4	Cdkl2	ENSMUSG00000029403	cyclin-dependent kinase-like 2 (CDC2-related kinase)	459	0.2	1	14 +/- 11	14 +/- 11
scl0320445.1_30	Clint1	ENSMUSG00000006169	clathrin interactor 1	459	0.2	1	15 +/- 11	15 +/- 11
scl53555.1_6	0610038D11Rik	NA	NA	459	0.2	1	14 +/- 11	14 +/- 11
scl014567.8_50	Gdi1	ENSMUSG00000015291	guanosine diphosphate (GDP) dissociation inhibitor 1	459	0.2	1	16 +/- 11	18 +/- 12
scl000501.1_12	Uhrf2	ENSMUSG00000024817	ubiquitin-like, containing PHD and RING finger domains 2	459	0.2	1	14 +/- 11	9 +/- 11
scl26445.6.1_1	Igfbp7	ENSMUSG00000036256	insulin-like growth factor binding protein 7	459	0.2	1	11 +/- 10	24 +/- 12
scl19143.19.1_31	Gpr155	ENSMUSG00000041762	G protein-coupled receptor 155	459	0.2	1	14 +/- 10	18 +/- 12
scl49862.18.1_0	Klc4	ENSMUSG00000003546	kinesin light chain 4	459	0.2	1	17 +/- 11	14 +/- 11
scl020535.23_4	Slc4a2	ENSMUSG00000028962	solute carrier family 4 (anion exchanger), member 2	459	0.2	1	12 +/- 10	20 +/- 12
scl43030.13_217	Exd2	ENSMUSG00000032705	exonuclease 3'-5' domain containing 2	459	0.2	1	17 +/- 12	15 +/- 11
scl026422.1_17	Nbea	ENSMUSG00000027799	neurobeachin	459	0.2	1	11 +/- 11	3 +/- 10
scl33219.11.1_14	Acsf3	ENSMUSG00000015016	acyl-CoA synthetase family member 3	459	0.2	1	14 +/- 12	0 +/- 9
scl0003521.1_94	Keap1	ENSMUSG00000003308	kelch-like ECH-associated protein 1	459	0.2	1	13 +/- 11	1 +/- 10
scl30447.2_284	Mrgpre	ENSMUSG00000048965	MAS-related GPR, member E	459	0.2	1	14 +/- 11	7 +/- 10
scl39620.4_46	1810046J19Rik	NA	NA	459	0.2	1	14 +/- 11	2 +/- 10
scl00320064.1_316	AK046914	NA	NA	459	0.2	1	6 +/- 10	11 +/- 10
scl19515.3_120	Med22	ENSMUSG00000015776	mediator complex subunit 22	459	0.2	1	18 +/- 11	16 +/- 11
scl016189.4_22	Il4	ENSMUSG00000000869	interleukin 4	459	0.2	1	15 +/- 10	18 +/- 12
scl22588.2.3131_13	Cxxc4	ENSMUSG00000044365	CXXC finger 4	459	0.2	1	10 +/- 10	30 +/- 13
scl30015.3_69	2410066E13Rik	NA	NA	459	0.2	1	8 +/- 10	21 +/- 12
scl38883.14.1_156	Ascc1	ENSMUSG00000044475	activating signal cointegrator 1 complex subunit 1	459	0.2	1	18 +/- 11	15 +/- 11
scl0021843.2_5	Tial1	ENSMUSG00000030846	Tia1 cytotoxic granule-associated RNA binding protein-like 1	459	0.2	1	8 +/- 10	1 +/- 10
scl0014339.2_163	Aktip	ENSMUSG00000031667	thymoma viral proto-oncogene 1 interacting protein	459	0.2	1	12 +/- 9	60 +/- 11
scl0001848.1_33	Anks3	ENSMUSG00000022515	ankyrin repeat and sterile alpha motif domain containing 3	459	0.2	1	7 +/- 10	0 +/- 9
scl19572.12_3	Ndor1	ENSMUSG00000006471	NADPH dependent diflavin oxidoreductase 1	459	0.2	1	18 +/- 11	11 +/- 10
scl54178.10_163	Cd99l2	ENSMUSG00000035776	CD99 antigen-like 2	459	0.2	1	5 +/- 10	3 +/- 10
ri|A730075A08|PX00152K23|AK043242|1425	AK043242	NA	NA	459	0.2	1	6 +/- 10	1 +/- 9
scl36905.1.71_309	Rpp25	ENSMUSG00000062309	ribonuclease P/MRP 25 subunit	459	0.2	1	18 +/- 11	37 +/- 11
scl41339.16.1_19	Arrb2	ENSMUSG00000060216	arrestin, beta 2	459	0.2	1	22 +/- 12	40 +/- 12
scl31485.22_238	Gpi1	ENSMUSG00000036427	glucose phosphate isomerase 1	459	0.2	1	13 +/- 10	41 +/- 11
scl014115.17_10	Fbln2	ENSMUSG00000064080	fibulin 2	459	0.2	1	4 +/- 10	6 +/- 10
scl15941.6.1_27	Ndufs2	ENSMUSG00000013593	NADH dehydrogenase (ubiquinone) Fe-S protein 2	459	0.21	1	5 +/- 9	48 +/- 13
ri|1700013A01|ZX00036P08|AK005934|1139	Ryr3	ENSMUSG00000057378	ryanodine receptor 3	459	0.21	1	8 +/- 10	38 +/- 13
scl43550.14_339	2410002O22Rik	NA	NA	459	0.21	1	10 +/- 10	26 +/- 10
scl37011.7_65	Fxyd6	ENSMUSG00000066705	FXYD domain-containing ion transport regulator 6	459	0.21	1	3 +/- 9	49 +/- 13
scl0066074.2_236	Tmem167	ENSMUSG00000012422	transmembrane protein 167	459	0.21	1	5 +/- 10	9 +/- 9
scl018616.1_273	Peg3	ENSMUSG00000002265	paternally expressed 3	459	0.21	1	11 +/- 11	7 +/- 9
scl22158.8.1_12	Exosc8	ENSMUSG00000027752	exosome component 8	459	0.21	1	6 +/- 9	26 +/- 12
scl41354.10.1_7	Ybx2	ENSMUSG00000018554	Y box protein 2	459	0.21	1	12 +/- 10	25 +/- 12
scl0002566.1_2	Myg1	ENSMUSG00000001285	melanocyte proliferating gene 1	459	0.21	1	15 +/- 12	30 +/- 12
scl018802.16_14	Plcd4	ENSMUSG00000026173	phospholipase C, delta 4	459	0.21	1	5 +/- 9	24 +/- 12
scl0002236.1_9	Mbp	ENSMUSG00000041607	myelin basic protein	459	0.21	1	12 +/- 11	26 +/- 12
scl065973.2_37	Asph	ENSMUSG00000028207	aspartate-beta-hydroxylase	459	0.21	1	9 +/- 10	28 +/- 12
scl33900.6_43	D8Ertd82e	ENSMUSG00000050271	DNA segment, Chr 8, ERATO Doi 82, expressed	459	0.21	1	4 +/- 9	27 +/- 12
scl44027.5.1_15	Tmem181	NA	NA	459	0.21	1	4 +/- 10	8 +/- 10
scl54748.8.1_13	Gdpd2	ENSMUSG00000019359	glycerophosphodiester phosphodiesterase domain containing 2	459	0.21	1	15 +/- 11	30 +/- 12
scl00319513.1_270	Fam113a	NA	NA	459	0.21	1	10 +/- 10	21 +/- 12
scl27119.4.1_2	Polr2j	ENSMUSG00000039771	polymerase (RNA) II (DNA directed) polypeptide J	459	0.21	1	12 +/- 11	3 +/- 10
scl00237353.1_95	Sh3rf3	ENSMUSG00000037990	SH3 domain containing ring finger 3	459	0.21	1	8 +/- 9	26 +/- 12
scl52477.5.1_20	Avpi1	ENSMUSG00000018821	arginine vasopressin-induced 1	459	0.21	1	16 +/- 11	19 +/- 12
scl46889.23.1_98	Efcab6	ENSMUSG00000022441	EF-hand calcium binding domain 6	459	0.21	1	5 +/- 9	26 +/- 12
scl0069080.2_160	Gmppa	ENSMUSG00000033021	GDP-mannose pyrophosphorylase A	459	0.21	1	16 +/- 11	23 +/- 12
GI_38076479	Kbtbd7	ENSMUSG00000043881	kelch repeat and BTB (POZ) domain containing 7	459	0.21	1	5 +/- 10	22 +/- 12
scl013996.2_4	Etohd2	ENSMUSG00000089875	ethanol decreased 2	459	0.21	1	12 +/- 11	1 +/- 9
scl49857.14.1_9	Klhdc3	ENSMUSG00000063576	kelch domain containing 3	459	0.21	1	19 +/- 12	9 +/- 10
scl0001651.1_229	2610110G12Rik	NA	NA	459	0.21	1	11 +/- 10	24 +/- 12
scl00278672.2_186	Duxbl	NA	NA	459	0.21	1	5 +/- 9	19 +/- 12
ri|0610011I19|R000002D04|AK002548|1137	Capn8	ENSMUSG00000038599	calpain 8	459	0.21	1	14 +/- 10	21 +/- 12
scl0057247.1_172	Zfp276	ENSMUSG00000001065	zinc finger protein (C2H2 type) 276	459	0.21	1	15 +/- 11	17 +/- 11
scl0014545.2_19	Gdap1	ENSMUSG00000025777	ganglioside-induced differentiation-associated-protein 1	459	0.21	1	8 +/- 11	1 +/- 9
scl0003797.1_22	Nup37	ENSMUSG00000035351	nucleoporin 37	459	0.21	1	16 +/- 11	14 +/- 11
scl49886.18.1_30	Slc29a1	ENSMUSG00000023942	solute carrier family 29 (nucleoside transporters), member 1	459	0.21	1	16 +/- 11	14 +/- 11
scl027418.18_28	Mkln1	ENSMUSG00000025609	muskelin 1, intracellular mediator containing kelch motifs	459	0.21	1	16 +/- 11	17 +/- 11
ri|5930417L10|PX00055G09|AK031156|3030	Epb4.1l3	ENSMUSG00000024044	erythrocyte protein band 4.1 like 3	459	0.21	1	14 +/- 11	18 +/- 11
scl0003687.1_76	Trim23	ENSMUSG00000021712	tripartite motif-containing 23	459	0.21	1	17 +/- 11	13 +/- 11
scl0003572.1_2	Tcf12	ENSMUSG00000032228	transcription factor 12	459	0.21	1	11 +/- 11	0 +/- 9
scl4227.1.1_249	2600010E01Rik	NA	NA	459	0.21	1	16 +/- 11	15 +/- 11
scl32503.17_194	Acan	ENSMUSG00000030607	aggrecan	459	0.21	1	8 +/- 9	18 +/- 12
scl40135.12_123	Aldh3a2	ENSMUSG00000010025	aldehyde dehydrogenase family 3, subfamily A2	459	0.21	1	9 +/- 9	23 +/- 12
scl0012738.2_49	Cldn2	ENSMUSG00000047230	claudin 2	459	0.21	1	8 +/- 9	19 +/- 12
scl48463.11_73	Qtrtd1	ENSMUSG00000022704	queuine tRNA-ribosyltransferase domain containing 1	459	0.21	1	18 +/- 11	19 +/- 12
scl26168.1.495_191	BC051920	NA	NA	459	0.21	1	22 +/- 12	21 +/- 12
scl30639.8_248	Bcl7c	ENSMUSG00000030814	B cell CLL/lymphoma 7C	459	0.21	1	13 +/- 11	4 +/- 10
scl11783.1.1_330	Olfr1402	ENSMUSG00000051392	olfactory receptor 1402	459	0.21	1	13 +/- 10	19 +/- 12
scl37305.10.1_6	Mmp10	ENSMUSG00000047562	matrix metallopeptidase 10	459	0.21	1	9 +/- 10	16 +/- 12
scl020197.3_143	S100a3	ENSMUSG00000001021	S100 calcium binding protein A3	459	0.21	1	12 +/- 10	18 +/- 12
ri|C030034J23|PX00665J16|AK081262|2599	4921533L14Rik	NA	NA	459	0.21	1	12 +/- 11	5 +/- 10
scl00224530.2_232	Acat2	ENSMUSG00000023832	acetyl-Coenzyme A acetyltransferase 2	459	0.21	1	11 +/- 11	2 +/- 10
GI_38078983	AK161073	NA	NA	459	0.21	1	10 +/- 11	3 +/- 10
scl0026450.2_100	Rbbp9	ENSMUSG00000027428	retinoblastoma binding protein 9	459	0.21	1	10 +/- 10	17 +/- 12
scl41883.7.1_5	Zmat5	ENSMUSG00000009076	zinc finger, matrin type 5	459	0.21	1	4 +/- 10	7 +/- 10
scl0003803.1_4	Vps26a	ENSMUSG00000020078	vacuolar protein sorting 26 homolog A (yeast)	459	0.21	1	16 +/- 11	9 +/- 11
scl011799.1_11	Birc5	ENSMUSG00000017716	baculoviral IAP repeat-containing 5	459	0.21	1	7 +/- 9	19 +/- 12
ri|B930092H13|PX00166H17|AK047576|3836	Nfib	ENSMUSG00000008575	nuclear factor I/B	459	0.21	1	22 +/- 12	10 +/- 11
scl29945.5_360	A930038C07Rik	NA	NA	459	0.21	1	16 +/- 11	15 +/- 11
scl0235559.10_91	Topbp1	ENSMUSG00000032555	topoisomerase (DNA) II binding protein 1	459	0.21	1	6 +/- 9	21 +/- 12
scl17206.2_153	Kcnj10	ENSMUSG00000044708	potassium inwardly-rectifying channel, subfamily J, member 10	459	0.21	1	9 +/- 10	20 +/- 12
scl0238871.11_15	Pde4d	ENSMUSG00000021699	phosphodiesterase 4D, cAMP specific	459	0.21	1	11 +/- 10	17 +/- 12
scl0026412.2_155	Map4k2	ENSMUSG00000024948	mitogen-activated protein kinase kinase kinase kinase 2	459	0.21	1	17 +/- 11	8 +/- 11
scl23160.1.1_183	AK020901	NA	NA	459	0.21	1	14 +/- 10	19 +/- 12
scl50009.17.1_17	C2	ENSMUSG00000024371	complement component 2 (within H-2S)	459	0.21	1	15 +/- 12	9 +/- 10
scl0015959.1_2	Ifit3	ENSMUSG00000074896	interferon-induced protein with tetratricopeptide repeats 3	459	0.21	1	15 +/- 11	31 +/- 13
scl0001523.1_20	Flot2	ENSMUSG00000061981	flotillin 2	459	0.21	1	12 +/- 11	3 +/- 10
scl017069.4_4	Ly6e	ENSMUSG00000022587	lymphocyte antigen 6 complex, locus E	459	0.21	1	5 +/- 9	27 +/- 12
scl0056516.1_106	Rbms2	ENSMUSG00000040043	RNA binding motif, single stranded interacting protein 2	459	0.21	1	9 +/- 11	1 +/- 10
ri|A130041O12|PX00122J10|AK037724|3038	mKIAA0578	NA	NA	459	0.21	1	12 +/- 10	17 +/- 11
scl36717.10_331	Rab27a	ENSMUSG00000032202	RAB27A, member RAS oncogene family	459	0.21	1	8 +/- 11	0 +/- 9
scl057785.2_9	Rangrf	ENSMUSG00000032892	RAN guanine nucleotide release factor	459	0.21	1	5 +/- 10	4 +/- 10
ri|1810037J08|ZX00051K09|AK007723|534	EG434402	NA	NA	459	0.21	1	17 +/- 12	20 +/- 11
scl54720.6_16	Chic1	ENSMUSG00000031327	cysteine-rich hydrophobic domain 1	459	0.21	1	9 +/- 11	12 +/- 9
GI_28487552	AK048269	NA	NA	459	0.21	1	1 +/- 7	81 +/- 10
scl070595.1_69	Sfpq	ENSMUSG00000028820	splicing factor proline/glutamine rich (polypyrimidine tract binding protein associated)	459	0.22	1	3 +/- 9	27 +/- 10
scl21531.3_177	5730508B09Rik	ENSMUSG00000050549	RIKEN cDNA 5730508B09 gene	459	0.22	1	10 +/- 10	43 +/- 13
ri|C430014G13|PX00078L02|AK049453|1079	SASH1	NA	NA	459	0.22	1	4 +/- 7	87 +/- 10
scl50767.4_663	Nrm	ENSMUSG00000059791	nurim (nuclear envelope membrane protein)	459	0.22	1	4 +/- 9	30 +/- 12
scl0100669.2_129	BC019681	NA	NA	459	0.22	1	3 +/- 9	37 +/- 13
scl0013858.2_190	Eps15	ENSMUSG00000028552	epidermal growth factor receptor pathway substrate 15	459	0.22	1	4 +/- 9	33 +/- 12
scl23586.1.295_70	AK041061	NA	NA	459	0.22	1	4 +/- 10	21 +/- 10
ri|6430515G22|PX00045F03|AK032284|3840	Epm2aip1	ENSMUSG00000046785	EPM2A (laforin) interacting protein 1	459	0.22	1	21 +/- 12	5 +/- 10
scl000080.1_69_REVCOMP	Fancl	ENSMUSG00000004018	Fanconi anemia, complementation group L	459	0.22	1	18 +/- 12	24 +/- 11
scl057783.1_1	Tnip1	ENSMUSG00000020400	TNFAIP3 interacting protein 1	459	0.22	1	6 +/- 10	14 +/- 10
scl012608.3_48	Cebpb	ENSMUSG00000056501	CCAAT/enhancer binding protein (C/EBP), beta	459	0.22	1	17 +/- 11	16 +/- 11
scl38049.5.1_21	1700025K23Rik	NA	NA	459	0.22	1	11 +/- 11	0 +/- 9
scl18777.19_238	Cdan1	ENSMUSG00000027284	congenital dyserythropoietic anemia, type I (human)	459	0.22	1	6 +/- 9	22 +/- 12
scl0001844.1_62	Mfi2	ENSMUSG00000022780	antigen p97 (melanoma associated) identified by monoclonal antibodies 133.2 and 96.5	459	0.22	1	7 +/- 9	19 +/- 12
scl49123.1_626	AK032503	NA	NA	459	0.22	1	16 +/- 11	17 +/- 11
scl0017345.1_1	Mki67	ENSMUSG00000031004	antigen identified by monoclonal antibody Ki 67	459	0.22	1	8 +/- 10	20 +/- 12
scl027967.3_2	Cherp	ENSMUSG00000052488	calcium homeostasis endoplasmic reticulum protein	459	0.22	1	17 +/- 12	3 +/- 10
scl0070351.2_71	Ppp4r1	ENSMUSG00000061950	protein phosphatase 4, regulatory subunit 1	459	0.22	1	9 +/- 9	21 +/- 12
ri|8030479K13|PX00103G16|AK033268|4276	AK004338	NA	NA	459	0.22	1	10 +/- 10	16 +/- 11
scl30807.22.1_70	Mrvi1	ENSMUSG00000005611	MRV integration site 1	459	0.22	1	4 +/- 9	23 +/- 12
scl31814.9.1_5	Tnnt1	ENSMUSG00000064179	troponin T1, skeletal, slow	459	0.22	1	18 +/- 11	10 +/- 11
scl0002994.1_38	Fundc1	ENSMUSG00000025040	FUN14 domain containing 1	459	0.22	1	9 +/- 10	17 +/- 11
scl0326618.9_77	Tpm4	ENSMUSG00000031799	tropomyosin 4	459	0.22	1	4 +/- 10	21 +/- 12
ri|4732462B05|PX00051O12|AK028848|2782	Auts2	ENSMUSG00000029673	autism susceptibility candidate 2	459	0.22	1	12 +/- 10	15 +/- 11
scl0001911.1_22	Umps	ENSMUSG00000022814	uridine monophosphate synthetase	459	0.22	1	18 +/- 12	12 +/- 11
scl00233887.1_13	Zfp553	ENSMUSG00000045598	zinc finger protein 553	459	0.22	1	18 +/- 11	11 +/- 11
scl8139.1.1_103	AK004352	NA	NA	459	0.22	1	13 +/- 10	13 +/- 11
scl38427.7.1_13	Zfc3h1	ENSMUSG00000034163	zinc finger, C3H1-type containing	459	0.22	1	10 +/- 10	17 +/- 12
scl23444.10.4_45	Tnfrsf14	ENSMUSG00000042333	tumor necrosis factor receptor superfamily, member 14 (herpesvirus entry mediator)	459	0.22	1	15 +/- 11	16 +/- 11
scl20280.1.1_3	AK035489	NA	NA	459	0.22	1	13 +/- 10	17 +/- 12
ri|4930431D16|PX00030F13|AK015263|1600	Tmod2	ENSMUSG00000032186	tropomodulin 2	459	0.22	1	7 +/- 9	18 +/- 12
scl093836.1_167	Rnf111	ENSMUSG00000032217	ring finger 111	459	0.22	1	8 +/- 10	17 +/- 12
GI_38090004	Atr	ENSMUSG00000032409	ataxia telangiectasia and Rad3 related	459	0.22	1	12 +/- 10	16 +/- 12
scl47579.6.1_16	Tmem117	ENSMUSG00000063296	transmembrane protein 117	459	0.22	1	10 +/- 10	22 +/- 12
scl0068916.1_226	Cdkal1	ENSMUSG00000006191	CDK5 regulatory subunit associated protein 1-like 1	459	0.22	1	13 +/- 11	15 +/- 11
scl0003625.1_24	Pik3r1	ENSMUSG00000041417	phosphatidylinositol 3-kinase, regulatory subunit, polypeptide 1 (p85 alpha)	459	0.22	1	14 +/- 11	16 +/- 11
scl49242.3.1_172	Wdr53	ENSMUSG00000022787	WD repeat domain 53	459	0.22	1	16 +/- 11	15 +/- 11
scl00224814.2_26	Abcc10	ENSMUSG00000032842	ATP-binding cassette, sub-family C (CFTR/MRP), member 10	459	0.22	1	10 +/- 10	15 +/- 11
scl30562.12.1_13	Uros	ENSMUSG00000030979	uroporphyrinogen III synthase	459	0.22	1	16 +/- 11	19 +/- 12
scl34058.1.1_81	AK016766	NA	NA	459	0.22	1	17 +/- 11	16 +/- 12
scl39972.2.1_24	Med31	ENSMUSG00000020801	mediator complex subunit 31	459	0.22	1	17 +/- 12	11 +/- 11
ri|6720452M21|PX00059E10|AK032790|3195	Hmg20a	ENSMUSG00000032329	high mobility group 20A	459	0.22	1	17 +/- 11	15 +/- 11
ri|A830005C06|PX00153N11|AK043522|1821	Rspry1	ENSMUSG00000050079	ring finger and SPRY domain containing 1	459	0.22	1	14 +/- 11	13 +/- 11
scl0140570.1_51	Plxnb2	ENSMUSG00000036606	plexin B2	459	0.22	1	20 +/- 12	11 +/- 11
ri|B130018F13|PX00157J02|AK044994|1305	Lrig3	ENSMUSG00000020105	leucine-rich repeats and immunoglobulin-like domains 3	459	0.22	1	12 +/- 11	3 +/- 10
scl0015168.2_8	Hcn3	ENSMUSG00000028051	hyperpolarization-activated, cyclic nucleotide-gated K+ 3	459	0.22	1	14 +/- 11	7 +/- 10
scl39310.22.1_30	Exoc7	ENSMUSG00000020792	exocyst complex component 7	459	0.22	1	22 +/- 12	24 +/- 12
scl021885.1_30	Tle1	ENSMUSG00000008305	transducin-like enhancer of split 1, homolog of Drosophila E(spl)	459	0.22	1	9 +/- 10	61 +/- 12
scl0277463.18_58	Gpr107	ENSMUSG00000000194	G protein-coupled receptor 107	459	0.22	1	7 +/- 10	0 +/- 10
scl30991.12_298	Pold3	ENSMUSG00000030726	polymerase (DNA-directed), delta 3, accessory subunit	459	0.22	1	12 +/- 11	43 +/- 12
scl068708.1_138	Rabl2a	NA	NA	459	0.22	1	6 +/- 10	15 +/- 10
scl0381921.2_8	Taok2	ENSMUSG00000059981	TAO kinase 2	459	0.22	1	4 +/- 10	3 +/- 10
scl33562.10.1_132	Fbxw9	ENSMUSG00000008167	F-box and WD-40 domain protein 9	459	0.22	1	4 +/- 10	2 +/- 10
scl44323.5.1_4	Paip1	ENSMUSG00000025451	polyadenylate binding protein-interacting protein 1	459	0.22	1	3 +/- 8	46 +/- 10
scl0066039.2_47	D14Ertd449e	NA	NA	459	0.22	1	12 +/- 11	6 +/- 10
scl0003245.1_6	Snap23	ENSMUSG00000027287	synaptosomal-associated protein 23	459	0.22	1	8 +/- 9	60 +/- 12
ri|9630038C08|PX00116O10|AK036131|3133	AK036131	NA	NA	459	0.23	1	13 +/- 11	25 +/- 10
scl066364.3_40	BC037369	NA	NA	459	0.23	1	5 +/- 10	36 +/- 12
scl056844.4_168	Tssc4	ENSMUSG00000045752	tumor-suppressing subchromosomal transferable fragment 4	459	0.23	1	19 +/- 12	13 +/- 10
scl0011491.1_129	Adam17	ENSMUSG00000052593	a disintegrin and metallopeptidase domain 17	459	0.23	1	10 +/- 10	33 +/- 13
scl000140.1_18	Sprn	ENSMUSG00000045733	shadow of prion protein	459	0.23	1	14 +/- 11	2 +/- 9
scl40755.5.1_55	D11Wsu47e	ENSMUSG00000041623	DNA segment, Chr 11, Wayne State University 47, expressed	459	0.23	1	4 +/- 10	10 +/- 10
GI_38075336	Rpl29	ENSMUSG00000048758	ribosomal protein L29	459	0.23	1	5 +/- 10	8 +/- 10
scl34734.15_112	4732435N03Rik	NA	NA	459	0.23	1	9 +/- 11	0 +/- 9
scl0003113.1_49	Arfgap2	ENSMUSG00000027255	ADP-ribosylation factor GTPase activating protein 2	459	0.23	1	11 +/- 10	21 +/- 12
scl48750.6_548	Cpped1	ENSMUSG00000065979	calcineurin-like phosphoesterase domain containing 1	459	0.23	1	7 +/- 9	21 +/- 12
scl0001326.1_0	Asb3	ENSMUSG00000020305	ankyrin repeat and SOCS box-containing 3	459	0.23	1	12 +/- 11	1 +/- 9
scl50402.5_409	Socs5	ENSMUSG00000037104	suppressor of cytokine signaling 5	459	0.23	1	8 +/- 11	3 +/- 10
scl44407.1.1_301	AK052062	NA	NA	459	0.23	1	14 +/- 11	7 +/- 11
scl32066.25_84	D430042O09Rik	ENSMUSG00000032743	RIKEN cDNA D430042O09 gene	459	0.23	1	7 +/- 10	0 +/- 9
ri|A130029H05|PX00121L21|AK037607|2257	Ptbp1	ENSMUSG00000006498	polypyrimidine tract binding protein 1	459	0.23	1	8 +/- 9	21 +/- 12
scl39553.16.1_62	Kat2a	ENSMUSG00000020918	K(lysine) acetyltransferase 2A	459	0.23	1	20 +/- 12	22 +/- 12
scl32336.1.747_2	BC025039	NA	NA	459	0.23	1	9 +/- 10	23 +/- 12
ri|2510015F01|ZX00047N14|AK010966|669	Nt5dc2	ENSMUSG00000071547	5'-nucleotidase domain containing 2	459	0.23	1	8 +/- 11	1 +/- 9
scl0110196.3_64	Fdps	ENSMUSG00000059743	farnesyl diphosphate synthetase	459	0.23	1	8 +/- 10	35 +/- 13
scl39752.1.1_196	Olfr464	ENSMUSG00000060787	olfactory receptor 464	459	0.23	1	20 +/- 12	20 +/- 12
scl54114.2_230	Rab39b	ENSMUSG00000031202	RAB39B, member RAS oncogene family	459	0.23	1	16 +/- 11	18 +/- 12
GI_28522595	Gm266	ENSMUSG00000010529	predicted gene 266	459	0.23	1	9 +/- 10	1 +/- 10
scl51732.3_235	Pard6g	ENSMUSG00000056214	par-6 family cell polarity regulator gamma	459	0.23	1	12 +/- 10	12 +/- 11
scl000671.1_1	Spg7	ENSMUSG00000000738	spastic paraplegia 7 homolog (human)	459	0.23	1	13 +/- 11	1 +/- 10
scl013132.15_5	Dab2	ENSMUSG00000022150	disabled 2, mitogen-responsive phosphoprotein	459	0.23	1	7 +/- 9	20 +/- 12
scl0001454.1_1188	Cytsb	NA	NA	459	0.23	1	7 +/- 9	17 +/- 12
scl18309.1.1_213	B4galt5	ENSMUSG00000017929	UDP-Gal:betaGlcNAc beta 1,4-galactosyltransferase, polypeptide 5	459	0.23	1	15 +/- 11	10 +/- 11
scl0094061.1_118	Mrpl1	ENSMUSG00000029486	mitochondrial ribosomal protein L1	459	0.23	1	13 +/- 10	14 +/- 11
scl0004103.1_1	Krit1	ENSMUSG00000000600	KRIT1, ankyrin repeat containing	459	0.23	1	18 +/- 11	11 +/- 11
scl30886.20_47	Apbb1	ENSMUSG00000037032	amyloid beta (A4) precursor protein-binding, family B, member 1	459	0.23	1	16 +/- 11	9 +/- 11
scl00192192.1_155	Shkbp1	ENSMUSG00000089832	Sh3kbp1 binding protein 1	459	0.23	1	15 +/- 10	22 +/- 12
scl0002480.1_38	Naprt1	NA	NA	459	0.23	1	15 +/- 11	10 +/- 11
scl42944.7.1_31	Vash1	ENSMUSG00000021256	vasohibin 1	459	0.23	1	10 +/- 10	17 +/- 12
scl00100710.2_193	Pds5b	ENSMUSG00000034021	PDS5, regulator of cohesion maintenance, homolog B (S. cerevisiae)	459	0.23	1	14 +/- 11	5 +/- 10
scl39206.7_318	BC017643	ENSMUSG00000039294	cDNA sequence BC017643	459	0.23	1	6 +/- 10	0 +/- 9
ri|A430106B04|PX00064L03|AK040546|1289	AK040546	NA	NA	459	0.23	1	7 +/- 9	21 +/- 12
scl0019878.1_16	Rock2	ENSMUSG00000020580	Rho-associated coiled-coil containing protein kinase 2	459	0.23	1	17 +/- 11	10 +/- 11
scl0016494.1_229	Kcna6	ENSMUSG00000038077	potassium voltage-gated channel, shaker-related, subfamily, member 6	459	0.23	1	13 +/- 11	6 +/- 10
scl0104757.2_50	BC058545	NA	NA	459	0.23	1	10 +/- 11	1 +/- 10
scl23441.8_64	Ski	ENSMUSG00000029050	ski sarcoma viral oncogene homolog (avian)	459	0.23	1	20 +/- 12	9 +/- 10
scl073288.29_88	Ccdc132	ENSMUSG00000001376	coiled-coil domain containing 132	459	0.23	1	14 +/- 11	16 +/- 12
scl46141.4_0	Stc1	ENSMUSG00000014813	stanniocalcin 1	459	0.23	1	7 +/- 10	1 +/- 10
scl0067949.2_13	Mki67ip	NA	NA	459	0.23	1	6 +/- 9	24 +/- 12
scl0102143.1_151	Tnks	ENSMUSG00000031529	tankyrase, TRF1-interacting ankyrin-related ADP-ribose polymerase	459	0.23	1	6 +/- 10	0 +/- 10
scl46990.11.1_92	Il2rb	ENSMUSG00000068227	interleukin 2 receptor, beta chain	459	0.23	1	16 +/- 11	21 +/- 12
scl20634.1.1_64	AK087376	NA	NA	459	0.23	1	11 +/- 10	12 +/- 11
scl27078.4.1_81	0910001L09Rik	NA	NA	459	0.23	1	10 +/- 11	3 +/- 10
scl18987.13.1_0	Mapk8ip1	ENSMUSG00000027223	mitogen-activated protein kinase 8 interacting protein 1	459	0.23	1	20 +/- 12	17 +/- 11
scl35070.6.62_8	2410022L05Rik	NA	NA	459	0.23	1	12 +/- 11	3 +/- 10
scl44881.2_33	Dsp	ENSMUSG00000054889	desmoplakin	459	0.23	1	17 +/- 11	26 +/- 12
scl26466.1.1093_79	AK085934	NA	NA	459	0.23	1	6 +/- 10	0 +/- 9
scl34861.7.1_55	Ankrd37	ENSMUSG00000050914	ankyrin repeat domain 37	459	0.23	1	6 +/- 10	1 +/- 10
scl36950.1.1_88	AK053249	NA	NA	459	0.23	1	20 +/- 12	22 +/- 12
scl076073.9_113	Pcgf5	ENSMUSG00000024805	polycomb group ring finger 5	459	0.23	1	4 +/- 10	4 +/- 10
scl45034.23_392	Amph	ENSMUSG00000021314	amphiphysin	459	0.23	1	13 +/- 11	11 +/- 10
scl45663.15_583	AK036369	NA	NA	459	0.23	1	11 +/- 11	10 +/- 11
scl0068965.1_205	AK076606	NA	NA	459	0.23	1	5 +/- 8	71 +/- 11
ri|C230071F15|PX00176P17|AK082628|2077	AK082628	NA	NA	459	0.24	1	8 +/- 9	57 +/- 13
scl0026458.2_190	Slc27a2	ENSMUSG00000027359	solute carrier family 27 (fatty acid transporter), member 2	459	0.24	1	1 +/- 6	86 +/- 10
scl0074018.2_230	Als2	ENSMUSG00000026024	amyotrophic lateral sclerosis 2 (juvenile)	459	0.24	1	2 +/- 8	62 +/- 12
GI_38092211	Rps2	ENSMUSG00000044533	ribosomal protein S2	459	0.24	1	15 +/- 10	75 +/- 11
GI_38082125	AI413582	ENSMUSG00000062753	expressed sequence AI413582	459	0.24	1	4 +/- 9	43 +/- 13
scl015181.3_0	Hdac1	ENSMUSG00000028800	histone deacetylase 1	459	0.24	1	10 +/- 10	35 +/- 12
ri|B230209J16|PX00316L10|AK080803|1196	AK080803	NA	NA	459	0.24	1	13 +/- 11	30 +/- 12
scl35671.6_128	Lactb	ENSMUSG00000032370	lactamase, beta	459	0.24	1	5 +/- 10	6 +/- 10
scl0078510.1_253	Tmem49	NA	NA	459	0.24	1	11 +/- 10	20 +/- 11
ri|A630059J03|PX00146G14|AK042112|3338	Tnik	ENSMUSG00000027692	TRAF2 and NCK interacting kinase	459	0.24	1	17 +/- 11	8 +/- 10
scl0386753.1_250	Dbpht2	ENSMUSG00000029878	DNA binding protein with his-thr domain	459	0.24	1	7 +/- 10	18 +/- 11
scl33741.4_276	Hapln4	ENSMUSG00000007594	hyaluronan and proteoglycan link protein 4	459	0.24	1	4 +/- 9	34 +/- 12
GI_38086492	Taf9b	ENSMUSG00000047242	TAF9B RNA polymerase II, TATA box binding protein (TBP)-associated factor	459	0.24	1	22 +/- 12	7 +/- 10
scl19939.10.1_23	Rbpjl	ENSMUSG00000017007	recombination signal binding protein for immunoglobulin kappa J region-like	459	0.24	1	14 +/- 11	10 +/- 10
ri|4432416O06|PX00011M20|AK014500|2372	Dync2h1	ENSMUSG00000047193	dynein cytoplasmic 2 heavy chain 1	459	0.24	1	5 +/- 9	24 +/- 12
scl48442.3.1_5	Tagln3	ENSMUSG00000022658	transgelin 3	459	0.24	1	6 +/- 9	22 +/- 12
ri|9830138H06|PX00118E23|AK036590|3446	Trps1	ENSMUSG00000038679	trichorhinophalangeal syndrome I (human)	459	0.24	1	8 +/- 10	23 +/- 12
GI_25050440	Gm5065	ENSMUSG00000048398	predicted gene 5065	459	0.24	1	16 +/- 11	7 +/- 10
scl0001137.1_14	Mrps25	ENSMUSG00000014551	mitochondrial ribosomal protein S25	459	0.24	1	6 +/- 10	2 +/- 10
scl22977.3.91_193	Dpm3	ENSMUSG00000042737	dolichyl-phosphate mannosyltransferase polypeptide 3	459	0.24	1	15 +/- 11	13 +/- 11
scl33260.8.1_8	Necab2	ENSMUSG00000031837	N-terminal EF-hand calcium binding protein 2	459	0.24	1	8 +/- 10	21 +/- 12
scl37664.1.20_13	AK038649	NA	NA	459	0.24	1	12 +/- 10	15 +/- 11
scl18671.5_48	Pdyn	ENSMUSG00000027400	prodynorphin	459	0.24	1	6 +/- 11	4 +/- 10
scl0074144.2_313	Robo4	ENSMUSG00000032125	roundabout homolog 4 (Drosophila)	459	0.24	1	16 +/- 11	20 +/- 12
scl43128.4_203	Dact1	ENSMUSG00000044548	dapper homolog 1, antagonist of beta-catenin (xenopus)	459	0.24	1	5 +/- 9	17 +/- 11
scl000015.1_67_REVCOMP		ENSMUSG00000106534	NA	459	0.24	1	7 +/- 9	17 +/- 12
scl00269113.1_98	Nup54	ENSMUSG00000034826	nucleoporin 54	459	0.24	1	7 +/- 9	21 +/- 12
scl0241159.4_2	Neu4	ENSMUSG00000034000	sialidase 4	459	0.24	1	19 +/- 12	7 +/- 10
scl50668.1.78_47	Tbcc	ENSMUSG00000036430	tubulin-specific chaperone C	459	0.24	1	11 +/- 10	21 +/- 12
scl0002942.1_1346	Cd99l2	ENSMUSG00000035776	CD99 antigen-like 2	459	0.24	1	16 +/- 12	5 +/- 10
scl014910.2_30	U83174	NA	NA	459	0.24	1	14 +/- 10	14 +/- 11
scl0057748.2_44	Jmy	ENSMUSG00000021690	junction-mediating and regulatory protein	459	0.24	1	5 +/- 9	25 +/- 12
scl0002407.1_54	Zfyve1	ENSMUSG00000042628	zinc finger, FYVE domain containing 1	459	0.24	1	17 +/- 11	16 +/- 11
scl000987.1_58	AK136391	NA	NA	459	0.24	1	11 +/- 10	21 +/- 12
scl0013142.1_12	Dao	ENSMUSG00000042096	D-amino acid oxidase	459	0.24	1	10 +/- 10	16 +/- 12
scl52545.7.1_87	6530404N21Rik	NA	NA	459	0.24	1	15 +/- 11	11 +/- 11
scl43994.7.1_169	1110007C09Rik	ENSMUSG00000037960	RIKEN cDNA 1110007C09 gene	459	0.24	1	5 +/- 9	18 +/- 12
scl018481.14_0	Pak3	ENSMUSG00000031284	p21 protein (Cdc42/Rac)-activated kinase 3	459	0.24	1	13 +/- 11	10 +/- 11
scl36516.9.290_30	Twf2	ENSMUSG00000023277	twinfilin, actin-binding protein, homolog 2 (Drosophila)	459	0.24	1	8 +/- 10	19 +/- 12
scl0229589.1_17	Prune	ENSMUSG00000015711	prune homolog (Drosophila)	459	0.24	1	8 +/- 9	18 +/- 12
scl0214254.2_39	Nudt15	ENSMUSG00000033405	nudix (nucleoside diphosphate linked moiety X)-type motif 15	459	0.24	1	9 +/- 10	17 +/- 12
scl18044.4_44	Rpl31	ENSMUSG00000073702	ribosomal protein L31	459	0.24	1	11 +/- 10	18 +/- 12
scl00225207.2_53	Zfp521	ENSMUSG00000024420	zinc finger protein 521	459	0.24	1	10 +/- 10	26 +/- 12
scl0002777.1_339	Ak2	ENSMUSG00000028792	adenylate kinase 2	459	0.24	1	9 +/- 10	19 +/- 12
scl28780.8_93	Cyp26b1	ENSMUSG00000063415	cytochrome P450, family 26, subfamily b, polypeptide 1	459	0.24	1	8 +/- 9	21 +/- 12
scl0002102.1_79	Pogz	ENSMUSG00000038902	pogo transposable element with ZNF domain	459	0.24	1	9 +/- 10	16 +/- 12
scl31012.23.455_0	Uvrag	ENSMUSG00000035354	UV radiation resistance associated gene	459	0.24	1	8 +/- 10	19 +/- 12
scl0002337.1_39	BC034760	NA	NA	459	0.24	1	7 +/- 10	20 +/- 12
ri|4921519B16|PX00638N06|AK076576|2006	AK076576	NA	NA	459	0.24	1	17 +/- 11	15 +/- 11
scl0012050.1_82	Bcl2l2	ENSMUSG00000089682	BCL2-like 2	459	0.24	1	9 +/- 9	21 +/- 12
scl0081004.1_169	Tbl1xr1	ENSMUSG00000027630	transducin (beta)-like 1X-linked receptor 1	459	0.24	1	15 +/- 11	16 +/- 11
scl00270669.1_253	Mbtps2	ENSMUSG00000046873	membrane-bound transcription factor peptidase, site 2	459	0.24	1	11 +/- 10	15 +/- 11
ri|7630402G21|PX00060N07|AK033068|2513	Chrna10	ENSMUSG00000066279	cholinergic receptor, nicotinic, alpha polypeptide 10	459	0.24	1	8 +/- 10	1 +/- 10
scl0066748.2_33	4933404M02Rik	NA	NA	459	0.24	1	12 +/- 11	5 +/- 10
scl019166.8_87	Psma2	ENSMUSG00000015671	proteasome (prosome, macropain) subunit, alpha type 2	459	0.24	1	16 +/- 12	15 +/- 11
scl49610.9.216_11	Fez2	ENSMUSG00000056121	fasciculation and elongation protein zeta 2 (zygin II)	459	0.24	1	16 +/- 11	7 +/- 10
scl018120.4_62	Mrpl49	ENSMUSG00000007338	mitochondrial ribosomal protein L49	459	0.24	1	8 +/- 11	0 +/- 9
scl38919.2_135	Msl3l2	ENSMUSG00000047669	male-specific lethal 3-like 2 (Drosophila)	459	0.24	1	15 +/- 11	6 +/- 10
ri|6430518K01|PX00045H06|AK032312|2590	AK032312	NA	NA	459	0.24	1	14 +/- 11	3 +/- 10
scl19057.12.1_44	4833423E24Rik	ENSMUSG00000075217	RIKEN cDNA 4833423E24 gene	459	0.24	1	10 +/- 10	17 +/- 11
GI_38084191	Zfp467	ENSMUSG00000068551	zinc finger protein 467	459	0.24	1	6 +/- 10	0 +/- 10
scl16744.12_327	Rftn2	ENSMUSG00000025978	raftlin family member 2	459	0.24	1	5 +/- 10	9 +/- 10
scl30675.13.1_1	Coro1a	ENSMUSG00000030707	coronin, actin binding protein 1A	459	0.24	1	17 +/- 12	14 +/- 11
scl0330006.1_306	Prdm16	ENSMUSG00000039410	PR domain containing 16	459	0.24	1	4 +/- 10	13 +/- 10
scl0329002.1_2	AK156842	NA	NA	459	0.24	1	12 +/- 11	33 +/- 11
scl0003589.1_16	Nme6	ENSMUSG00000032478	NME/NM23 nucleoside diphosphate kinase 6	459	0.24	1	21 +/- 12	18 +/- 11
scl070510.9_205	Rnf167	ENSMUSG00000040746	ring finger protein 167	459	0.24	1	13 +/- 10	68 +/- 11
scl24109.2_501	Tusc1	ENSMUSG00000054000	tumor suppressor candidate 1	459	0.24	1	14 +/- 11	31 +/- 12
ri|E230026B07|PX00210N17|AK054185|1745	Mrpl3	ENSMUSG00000032563	mitochondrial ribosomal protein L3	459	0.24	1	15 +/- 9	80 +/- 10
scl0234852.1_50	Chmp1a	ENSMUSG00000000743	charged multivesicular body protein 1A	459	0.24	1	8 +/- 11	1 +/- 10
scl46751.13_99	Prkag1	ENSMUSG00000067713	protein kinase, AMP-activated, gamma 1 non-catalytic subunit	459	0.24	1	5 +/- 10	8 +/- 10
GI_38091464	Zzef1	ENSMUSG00000055670	zinc finger, ZZ-type with EF hand domain 1	459	0.24	1	9 +/- 11	24 +/- 11
ri|5930424F13|PX00055P01|AK031181|3830	Clasp1	ENSMUSG00000064302	CLIP associating protein 1	459	0.24	1	12 +/- 10	61 +/- 12
scl50686.4.1_41	Mrpl14	ENSMUSG00000023939	mitochondrial ribosomal protein L14	459	0.25	1	10 +/- 9	70 +/- 11
scl0069556.1_196	2310022M17Rik	NA	NA	459	0.25	1	12 +/- 9	70 +/- 11
GI_34328512	D12Ertd553e	NA	NA	459	0.25	1	4 +/- 9	43 +/- 12
scl43784.25.1_156	Adcy2	ENSMUSG00000021536	adenylate cyclase 2	459	0.25	1	5 +/- 9	31 +/- 12
GI_38082631	Rpl29	ENSMUSG00000048758	ribosomal protein L29	459	0.25	1	18 +/- 12	46 +/- 12
scl45364.8.1_112	R3hcc1	ENSMUSG00000034194	R3H domain and coiled-coil containing 1	459	0.25	1	10 +/- 10	47 +/- 12
scl0067464.2_263	Entpd4	ENSMUSG00000095463	ectonucleoside triphosphate diphosphohydrolase 4	459	0.25	1	9 +/- 10	42 +/- 13
scl18265.5_312	Pmepa1	ENSMUSG00000038400	prostate transmembrane protein, androgen induced 1	459	0.25	1	9 +/- 10	5 +/- 10
scl067939.1_2	Ncrna00117	NA	NA	459	0.25	1	4 +/- 9	30 +/- 13
scl27876.6.1_53	Tmem128	ENSMUSG00000067365	transmembrane protein 128	459	0.25	1	3 +/- 9	41 +/- 12
scl50678.6_219	Dlk2	ENSMUSG00000047428	delta-like 2 homolog (Drosophila)	459	0.25	1	14 +/- 11	27 +/- 12
scl0014284.1_16	Fosl2	ENSMUSG00000029135	fos-like antigen 2	459	0.25	1	11 +/- 10	27 +/- 12
scl36347.8_506	Endogl1	NA	NA	459	0.25	1	3 +/- 9	25 +/- 10
scl42798.1.1_138	Hhipl1	ENSMUSG00000021260	hedgehog interacting protein-like 1	459	0.25	1	2 +/- 8	63 +/- 12
scl41520.9.1_11	Zfp692	ENSMUSG00000037243	zinc finger protein 692	459	0.25	1	16 +/- 12	14 +/- 11
scl0002099.1_352	Pias3	ENSMUSG00000028101	protein inhibitor of activated STAT 3	459	0.25	1	10 +/- 10	21 +/- 11
scl000179.1_19	Wdr73	ENSMUSG00000025722	WD repeat domain 73	459	0.25	1	16 +/- 11	18 +/- 12
scl0029871.2_145	SCMH1	NA	NA	459	0.25	1	6 +/- 9	23 +/- 12
IGKV12-44_AJ235955_Ig_kappa_variable_12-44_18	abParts	NA	NA	459	0.25	1	12 +/- 10	22 +/- 12
scl0223915.1_185	Krt73	ENSMUSG00000063661	keratin 73	459	0.25	1	5 +/- 9	22 +/- 12
scl093871.1_35	Brwd1	ENSMUSG00000022914	bromodomain and WD repeat domain containing 1	459	0.25	1	9 +/- 10	29 +/- 13
ri|C130078D09|PX00171J01|AK048572|3060	Elmod2	ENSMUSG00000035151	ELMO/CED-12 domain containing 2	459	0.25	1	7 +/- 9	27 +/- 12
scl43749.35_225	Cast	ENSMUSG00000021585	calpastatin	459	0.25	1	5 +/- 9	22 +/- 12
scl49993.30.1_12	Bat2	NA	NA	459	0.25	1	14 +/- 11	8 +/- 10
scl077086.1_41	AK047205	NA	NA	459	0.25	1	13 +/- 11	3 +/- 10
GI_38089886	Vps13c	ENSMUSG00000035284	vacuolar protein sorting 13C (yeast)	459	0.25	1	10 +/- 10	26 +/- 12
scl000166.1_0	Sytl2	ENSMUSG00000030616	synaptotagmin-like 2	459	0.25	1	6 +/- 9	20 +/- 12
scl21104.8_445	Urm1	ENSMUSG00000069020	ubiquitin related modifier 1 homolog (S. cerevisiae)	459	0.25	1	16 +/- 11	8 +/- 10
scl5999.1.1_59	Sh3pxd2a	ENSMUSG00000053617	SH3 and PX domains 2A	459	0.25	1	18 +/- 11	13 +/- 11
scl0001354.1_37	Mgat4b	ENSMUSG00000036620	mannoside acetylglucosaminyltransferase 4, isoenzyme B	459	0.25	1	6 +/- 10	20 +/- 12
scl26467.3.1_2	Chic2	ENSMUSG00000029229	cysteine-rich hydrophobic domain 2	459	0.25	1	6 +/- 9	16 +/- 12
scl0016800.2_217	Arhgef2	ENSMUSG00000028059	rho/rac guanine nucleotide exchange factor (GEF) 2	459	0.25	1	6 +/- 9	17 +/- 12
scl50284.10.368_11	Dll1	ENSMUSG00000014773	delta-like 1 (Drosophila)	459	0.25	1	6 +/- 9	20 +/- 12
scl0001235.1_220	Pex5	ENSMUSG00000005069	peroxisomal biogenesis factor 5	459	0.25	1	12 +/- 10	13 +/- 11
scl16683.4_266	Fam119a	NA	NA	459	0.25	1	13 +/- 10	13 +/- 11
ri|7530407P09|PX00312G23|AK078688|2368	AK078688	NA	NA	459	0.25	1	12 +/- 10	18 +/- 12
scl22839.1.328_39	Sec22b	ENSMUSG00000027879	SEC22 vesicle trafficking protein homolog B (S. cerevisiae)	459	0.25	1	14 +/- 11	14 +/- 11
scl39091.7.1_0	Sgk	NA	NA	459	0.25	1	11 +/- 10	18 +/- 12
scl0074467.2_136	Pus10	ENSMUSG00000020280	pseudouridylate synthase 10	459	0.25	1	11 +/- 11	1 +/- 10
scl0258787.1_44	Olfr1248	ENSMUSG00000099356	olfactory receptor 1248	459	0.25	1	7 +/- 9	17 +/- 12
scl18329.2_280	2810408M09Rik	NA	NA	459	0.25	1	16 +/- 11	8 +/- 11
scl072969.1_26	Otud7b	ENSMUSG00000038495	OTU domain containing 7B	459	0.25	1	9 +/- 11	1 +/- 10
scl54568.29.184_2	Alg13	ENSMUSG00000041718	asparagine-linked glycosylation 13	459	0.25	1	10 +/- 10	18 +/- 12
scl8892.1.1_11	Olfr559	ENSMUSG00000066272	olfactory receptor 559	459	0.25	1	12 +/- 10	17 +/- 12
scl17826.1.31_58	Igfbp2	ENSMUSG00000039323	insulin-like growth factor binding protein 2	459	0.25	1	8 +/- 9	20 +/- 12
scl18159.25_509	Sulf1	ENSMUSG00000016918	sulfatase 1	459	0.25	1	9 +/- 9	18 +/- 12
scl46788.19_56	Slc38a1	ENSMUSG00000023169	solute carrier family 38, member 1	459	0.25	1	14 +/- 10	14 +/- 11
scl0319936.1_111	AK079994	NA	NA	459	0.25	1	15 +/- 11	11 +/- 11
ri|A630046J22|PX00146M19|AK041914|3803	Dock1	ENSMUSG00000058325	dedicator of cytokinesis 1	459	0.25	1	14 +/- 11	2 +/- 10
ri|9330169N05|PX00105H12|AK034257|4085	Myo16	ENSMUSG00000039057	myosin XVI	459	0.25	1	17 +/- 12	7 +/- 10
scl068750.4_57	Rreb1	ENSMUSG00000039087	ras responsive element binding protein 1	459	0.25	1	7 +/- 10	1 +/- 10
scl0001744.1_4	Gbl	NA	NA	459	0.25	1	12 +/- 10	27 +/- 12
scl10612.1.1_12	Saps2	NA	NA	459	0.25	1	17 +/- 11	9 +/- 11
GI_38076651	Tmtc4	ENSMUSG00000041594	transmembrane and tetratricopeptide repeat containing 4	459	0.25	1	17 +/- 11	14 +/- 11
scl6100.1.1_70	Olfr1499	ENSMUSG00000045395	olfactory receptor 1499	459	0.25	1	16 +/- 11	13 +/- 11
scl0003277.1_55	H13	ENSMUSG00000019188	histocompatibility 13	459	0.25	1	9 +/- 9	21 +/- 12
scl33069.30.1_21	Lig1	ENSMUSG00000056394	ligase I, DNA, ATP-dependent	459	0.25	1	12 +/- 10	14 +/- 11
ri|1600013E24|ZX00042O22|AK005439|2863	EG434797	NA	NA	459	0.25	1	9 +/- 11	0 +/- 10
scl0077480.1_264	Kidins220	ENSMUSG00000036333	kinase D-interacting substrate 220	459	0.25	1	16 +/- 12	16 +/- 11
scl0001081.1_37	Camk1	ENSMUSG00000030272	calcium/calmodulin-dependent protein kinase I	459	0.25	1	12 +/- 10	14 +/- 11
scl0066590.2_213	Farsa	ENSMUSG00000003808	phenylalanyl-tRNA synthetase, alpha subunit	459	0.25	1	3 +/- 9	19 +/- 11
scl50660.8.1_1	Mrps10	ENSMUSG00000034729	mitochondrial ribosomal protein S10	459	0.25	1	3 +/- 10	22 +/- 10
scl0003099.1_35	Smox	ENSMUSG00000027333	spermine oxidase	459	0.25	1	9 +/- 10	28 +/- 12
scl014585.2_30	Gfra1	ENSMUSG00000025089	glial cell line derived neurotrophic factor family receptor alpha 1	459	0.25	1	11 +/- 11	8 +/- 10
scl0330260.1_61	Pon2	ENSMUSG00000032667	paraoxonase 2	459	0.25	1	4 +/- 10	3 +/- 10
scl19566.6.1_18	Dpp7	ENSMUSG00000026958	dipeptidylpeptidase 7	459	0.25	1	5 +/- 10	1 +/- 9
scl066526.1_1	2210012G02Rik	NA	NA	459	0.25	1	8 +/- 9	54 +/- 13
scl28812.19_190	Hk2	ENSMUSG00000000628	hexokinase 2	459	0.25	1	2 +/- 9	24 +/- 10
scl0056459.2_315	Sae1	ENSMUSG00000052833	SUMO1 activating enzyme subunit 1	459	0.26	1	6 +/- 9	51 +/- 12
scl2206.1.1_322	AK155929	NA	NA	459	0.26	1	3 +/- 10	5 +/- 10
scl49542.15_45	Prepl	ENSMUSG00000024127	prolyl endopeptidase-like	459	0.26	1	12 +/- 11	25 +/- 12
scl0015191.2_38	Hdgf	ENSMUSG00000004897	hepatoma-derived growth factor	459	0.26	1	5 +/- 10	8 +/- 10
scl54833.10_21	Atp6ap1	ENSMUSG00000019087	ATPase, H+ transporting, lysosomal accessory protein 1	459	0.26	1	7 +/- 10	4 +/- 10
scl0023821.2_49	Bace	NA	NA	459	0.26	1	9 +/- 10	23 +/- 12
ri|0610006O05|R000001K05|AK002258|629	Hbb-b1	NA	NA	459	0.26	1	15 +/- 12	13 +/- 10
scl0003202.1_259	Caprin1	ENSMUSG00000027184	cell cycle associated protein 1	459	0.26	1	14 +/- 12	3 +/- 9
scl00192287.1_146	Slc25a36	ENSMUSG00000032449	solute carrier family 25, member 36	459	0.26	1	15 +/- 11	16 +/- 11
scl39780.1.1_180	ENSMUSG00000055697	NA	NA	459	0.26	1	6 +/- 10	11 +/- 10
GI_38095592	Ttc5	ENSMUSG00000006288	tetratricopeptide repeat domain 5	459	0.26	1	5 +/- 9	20 +/- 12
scl45723.1.148_13	Sncg	ENSMUSG00000023064	synuclein, gamma	459	0.26	1	5 +/- 10	2 +/- 10
scl49871.22.1_156	Abcc10	ENSMUSG00000032842	ATP-binding cassette, sub-family C (CFTR/MRP), member 10	459	0.26	1	20 +/- 12	13 +/- 11
scl35161.1.1_133	AK052248	NA	NA	459	0.26	1	7 +/- 9	19 +/- 12
scl066993.2_1	Smarcd3	ENSMUSG00000028949	SWI/SNF related, matrix associated, actin dependent regulator of chromatin, subfamily d, member 3	459	0.26	1	8 +/- 11	0 +/- 9
scl15048.1.1_2	Mpp7	ENSMUSG00000057440	membrane protein, palmitoylated 7 (MAGUK p55 subfamily member 7)	459	0.26	1	8 +/- 9	20 +/- 12
scl0237073.1_6	Rbm41	ENSMUSG00000031433	RNA binding motif protein 41	459	0.26	1	7 +/- 9	20 +/- 12
scl0269338.1_1	Vps39	ENSMUSG00000027291	vacuolar protein sorting 39 (yeast)	459	0.26	1	19 +/- 12	23 +/- 12
scl0012055.2_161	Bcl7c	ENSMUSG00000030814	B cell CLL/lymphoma 7C	459	0.26	1	18 +/- 12	24 +/- 12
scl47811.2_529	Zfp623	ENSMUSG00000050846	zinc finger protein 623	459	0.26	1	7 +/- 10	18 +/- 12
scl00233056.2_80	Zfp790	ENSMUSG00000011427	zinc finger protein 790	459	0.26	1	11 +/- 10	22 +/- 12
scl43651.15_178	Polk	ENSMUSG00000021668	polymerase (DNA directed), kappa	459	0.26	1	10 +/- 10	19 +/- 11
scl00110160.1_313	100041586	NA	NA	459	0.26	1	11 +/- 11	3 +/- 10
GI_38079063	Ajap1	ENSMUSG00000039546	adherens junction associated protein 1	459	0.26	1	19 +/- 12	15 +/- 11
scl51746.3_438	Ier3ip1	ENSMUSG00000090000	immediate early response 3 interacting protein 1	459	0.26	1	5 +/- 9	16 +/- 12
scl45265.10.1_1	Wbp4	ENSMUSG00000022023	WW domain binding protein 4	459	0.26	1	17 +/- 11	15 +/- 11
scl29678.2_366	Lrrn1	ENSMUSG00000034648	leucine rich repeat protein 1, neuronal	459	0.26	1	13 +/- 10	18 +/- 12
scl18647.1_62	Cenpb	ENSMUSG00000068267	centromere protein B	459	0.26	1	9 +/- 10	21 +/- 12
scl52194.28.1_10	Dtna	ENSMUSG00000024302	dystrobrevin alpha	459	0.26	1	14 +/- 11	14 +/- 11
scl0002927.1_17	Gyk	NA	NA	459	0.26	1	10 +/- 10	16 +/- 12
scl39104.23_0	Mtap7	NA	NA	459	0.26	1	9 +/- 10	3 +/- 10
scl073274.2_7	Gpbp1	ENSMUSG00000032745	GC-rich promoter binding protein 1	459	0.26	1	16 +/- 12	3 +/- 10
scl21050.3.17_15	Ptrh1	ENSMUSG00000053746	peptidyl-tRNA hydrolase 1 homolog (S. cerevisiae)	459	0.26	1	9 +/- 10	17 +/- 12
scl0002891.1_24	Atp6ap2	ENSMUSG00000031007	ATPase, H+ transporting, lysosomal accessory protein 2	459	0.26	1	16 +/- 11	20 +/- 12
scl0003661.1_1612	Nedd9	ENSMUSG00000021365	neural precursor cell expressed, developmentally down-regulated gene 9	459	0.26	1	13 +/- 11	13 +/- 11
scl44710.17.1_26	Tgfbi	ENSMUSG00000035493	transforming growth factor, beta induced	459	0.26	1	11 +/- 10	20 +/- 12
scl19796.4_22	AK014955	NA	NA	459	0.26	1	10 +/- 10	16 +/- 12
scl00320487.1_23	Heatr5a	ENSMUSG00000035181	HEAT repeat containing 5A	459	0.26	1	13 +/- 10	14 +/- 11
scl00192657.1_320	Ell2	ENSMUSG00000001542	elongation factor RNA polymerase II 2	459	0.26	1	13 +/- 10	17 +/- 12
scl0003033.1_624	Ttpal	ENSMUSG00000017679	tocopherol (alpha) transfer protein-like	459	0.26	1	8 +/- 9	18 +/- 12
scl0002998.1_67	Atp6ap2	ENSMUSG00000031007	ATPase, H+ transporting, lysosomal accessory protein 2	459	0.26	1	12 +/- 10	21 +/- 12
scl17296.11_403	Vamp4	ENSMUSG00000026696	vesicle-associated membrane protein 4	459	0.26	1	5 +/- 9	23 +/- 12
scl40722.36_271	2310067B10Rik	ENSMUSG00000020747	RIKEN cDNA 2310067B10 gene	459	0.26	1	12 +/- 11	1 +/- 10
scl50069.32.1454_21	Notch3	ENSMUSG00000038146	notch 3	459	0.26	1	12 +/- 10	16 +/- 12
scl9432.1.1_2	AK021117	NA	NA	459	0.26	1	16 +/- 12	23 +/- 11
scl43495.3.1_6	Gpx8	ENSMUSG00000021760	glutathione peroxidase 8 (putative)	459	0.26	1	6 +/- 9	17 +/- 12
scl0211482.4_98	Efhb	ENSMUSG00000023931	EF hand domain family, member B	459	0.26	1	7 +/- 10	19 +/- 12
scl00230709.1_4	Zmpste24	ENSMUSG00000043207	zinc metallopeptidase, STE24	459	0.26	1	10 +/- 11	3 +/- 10
scl20124.13_167	Csnk2a1	ENSMUSG00000074698	casein kinase 2, alpha 1 polypeptide	459	0.26	1	12 +/- 10	16 +/- 12
scl38092.5_307	BE650448	NA	NA	459	0.26	1	6 +/- 10	0 +/- 10
scl32642.3_586	Tmem86a	ENSMUSG00000010307	transmembrane protein 86A	459	0.26	1	9 +/- 10	17 +/- 11
scl35983.7_0	AK080673	NA	NA	459	0.26	1	7 +/- 10	19 +/- 12
scl0001385.1_401	Peli1	ENSMUSG00000020134	pellino 1	459	0.26	1	17 +/- 12	26 +/- 12
scl20330.11.1_76	Blvra	ENSMUSG00000001999	biliverdin reductase A	459	0.26	1	8 +/- 10	0 +/- 10
scl51491.3.1_12	AK039796	NA	NA	459	0.26	1	8 +/- 11	1 +/- 9
scl49892.1.1_210	AK086140	NA	NA	459	0.26	1	4 +/- 10	9 +/- 10
scl0066667.2_152	Hspbap1	ENSMUSG00000022849	Hspb associated protein 1	459	0.26	1	15 +/- 11	20 +/- 12
scl8008.1.1_156	AK043777	NA	NA	459	0.26	1	6 +/- 10	11 +/- 9
scl0022647.1_28	Zfp106	ENSMUSG00000027288	zinc finger protein 106	459	0.26	1	11 +/- 9	70 +/- 11
scl21849.6.80_71	Scnm1	ENSMUSG00000092607	sodium channel modifier 1	459	0.26	1	4 +/- 9	51 +/- 12
ri|2410112O06|ZX00082C09|AK010766|1602	Mtif2	ENSMUSG00000020459	mitochondrial translational initiation factor 2	459	0.26	1	1 +/- 6	93 +/- 9
scl46587.11.1_61	Plau	ENSMUSG00000021822	plasminogen activator, urokinase	459	0.27	1	17 +/- 11	51 +/- 12
scl0004146.1_45	Hsd17b11	ENSMUSG00000029311	hydroxysteroid (17-beta) dehydrogenase 11	459	0.27	1	12 +/- 10	44 +/- 11
GI_38079911	Rps18	ENSMUSG00000008668	ribosomal protein S18	459	0.27	1	3 +/- 9	28 +/- 10
scl014979.1_326	H2-Ke6	ENSMUSG00000073422	H2-K region expressed gene 6	459	0.27	1	8 +/- 10	37 +/- 13
scl0001171.1_13	Nagk	ENSMUSG00000034744	N-acetylglucosamine kinase	459	0.27	1	5 +/- 9	42 +/- 13
scl28528.10.882_17	1500001M20Rik	NA	NA	459	0.27	1	13 +/- 11	28 +/- 11
scl53438.9.1_79	Ndufv1	ENSMUSG00000037916	NADH dehydrogenase (ubiquinone) flavoprotein 1	459	0.27	1	5 +/- 9	35 +/- 13
scl067885.2_20	BC048556	NA	NA	459	0.27	1	17 +/- 11	43 +/- 12
scl36890.23.1_31	Stra6	ENSMUSG00000032327	stimulated by retinoic acid gene 6	459	0.27	1	14 +/- 11	28 +/- 12
scl0331392.2_192	EG331392	NA	NA	459	0.27	1	8 +/- 11	2 +/- 10
scl0001455.1_38	Slc25a11	ENSMUSG00000014606	solute carrier family 25 (mitochondrial carrier oxoglutarate carrier), member 11	459	0.27	1	15 +/- 11	8 +/- 10
scl19890.4.1_85	1500012F01Rik	ENSMUSG00000074578	RIKEN cDNA 1500012F01 gene	459	0.27	1	13 +/- 11	15 +/- 11
scl068837.8_1	Foxk2	ENSMUSG00000039275	forkhead box K2	459	0.27	1	9 +/- 10	30 +/- 13
scl054636.13_168	Wdr45	ENSMUSG00000039382	WD repeat domain 45	459	0.27	1	11 +/- 10	18 +/- 11
scl0269854.3_319	Nat14	ENSMUSG00000035285	N-acetyltransferase 14	459	0.27	1	13 +/- 10	24 +/- 12
scl24346.2_118	Alg2	ENSMUSG00000039740	asparagine-linked glycosylation 2 (alpha-1,3-mannosyltransferase)	459	0.27	1	14 +/- 11	4 +/- 10
GI_38084737	Kcng2	ENSMUSG00000059852	potassium voltage-gated channel, subfamily G, member 2	459	0.27	1	14 +/- 11	7 +/- 10
scl53547.13_444	Rcor2	ENSMUSG00000024968	REST corepressor 2	459	0.27	1	13 +/- 11	17 +/- 12
scl36570.9.1_64	Dbr1	ENSMUSG00000032469	debranching enzyme homolog 1 (S. cerevisiae)	459	0.27	1	6 +/- 9	25 +/- 12
scl000757.1_0	Inpp4a	ENSMUSG00000026113	inositol polyphosphate-4-phosphatase, type I	459	0.27	1	4 +/- 9	15 +/- 12
scl21042.3_694	AK081497	NA	NA	459	0.27	1	16 +/- 11	19 +/- 12
scl0019349.1_40	Rab7	ENSMUSG00000079477	RAB7, member RAS oncogene family	459	0.27	1	7 +/- 9	18 +/- 12
scl000947.1_28	Stau2	ENSMUSG00000025920	staufen (RNA binding protein) homolog 2 (Drosophila)	459	0.27	1	10 +/- 10	18 +/- 12
scl018574.14_254	Pde1b	ENSMUSG00000022489	phosphodiesterase 1B, Ca2+-calmodulin dependent	459	0.27	1	17 +/- 12	8 +/- 10
scl51549.11_11	Reep5	ENSMUSG00000005873	receptor accessory protein 5	459	0.27	1	7 +/- 10	19 +/- 12
scl067938.1_193	Myl12b	ENSMUSG00000034868	myosin, light chain 12B, regulatory	459	0.27	1	13 +/- 11	8 +/- 11
scl15142.1.1_162	Gnal	ENSMUSG00000024524	guanine nucleotide binding protein, alpha stimulating, olfactory type	459	0.27	1	13 +/- 11	5 +/- 10
scl34213.15_150	Cbfa2t3	ENSMUSG00000006362	core-binding factor, runt domain, alpha subunit 2, translocated to, 3 (human)	459	0.27	1	8 +/- 10	16 +/- 12
scl073166.5_2	Tm7sf2	ENSMUSG00000024799	transmembrane 7 superfamily member 2	459	0.27	1	5 +/- 10	0 +/- 10
scl067163.2_42	Ccdc47	ENSMUSG00000078622	coiled-coil domain containing 47	459	0.27	1	14 +/- 11	12 +/- 11
scl39299.4_652	Cygb	ENSMUSG00000020810	cytoglobin	459	0.27	1	10 +/- 11	1 +/- 10
scl48812.11_88	Adcy9	ENSMUSG00000005580	adenylate cyclase 9	459	0.27	1	14 +/- 11	13 +/- 11
ri|E430029E19|PX00100I20|AK088860|3379	Tbc1d9b	ENSMUSG00000036644	TBC1 domain family, member 9B	459	0.27	1	13 +/- 11	5 +/- 10
scl18205.11_294	Gmeb2	ENSMUSG00000038705	glucocorticoid modulatory element binding protein 2	459	0.27	1	11 +/- 11	6 +/- 10
scl32772.2_90	AK019701	NA	NA	459	0.27	1	12 +/- 10	9 +/- 11
scl0003611.1_1554	3222402P14Rik	NA	NA	459	0.27	1	8 +/- 11	0 +/- 10
scl42825.2_370	AK050883	NA	NA	459	0.27	1	12 +/- 10	13 +/- 11
scl31063.18_269	Tmem135	ENSMUSG00000039428	transmembrane protein 135	459	0.27	1	9 +/- 10	16 +/- 12
scl42286.5.1_0	Slc10a1	ENSMUSG00000021135	solute carrier family 10 (sodium/bile acid cotransporter family), member 1	459	0.27	1	9 +/- 10	16 +/- 12
scl47686.9.1_164	Cyp2d9	ENSMUSG00000068086	cytochrome P450, family 2, subfamily d, polypeptide 9	459	0.27	1	16 +/- 11	10 +/- 11
scl0012540.1_20	Cdc42	ENSMUSG00000006699	cell division cycle 42	459	0.27	1	14 +/- 11	11 +/- 11
scl019094.1_245	Mapk11	ENSMUSG00000053137	mitogen-activated protein kinase 11	459	0.27	1	13 +/- 11	9 +/- 11
scl0258261.1_328	Olfr325	ENSMUSG00000060765	olfactory receptor 325	459	0.27	1	12 +/- 10	19 +/- 12
scl014613.2_58	Gja5	ENSMUSG00000057123	gap junction protein, alpha 5	459	0.27	1	11 +/- 10	19 +/- 12
scl40126.18_106	Epn2	ENSMUSG00000001036	epsin 2	459	0.27	1	9 +/- 11	0 +/- 10
scl0114896.3_29	Afg3l1	ENSMUSG00000031967	AFG3-like AAA ATPase 1	459	0.27	1	14 +/- 11	7 +/- 11
scl28269.8_450	Rerg	ENSMUSG00000030222	RAS-like, estrogen-regulated, growth-inhibitor	459	0.27	1	14 +/- 12	11 +/- 10
scl0068051.1_156	Nutf2	ENSMUSG00000008450	nuclear transport factor 2	459	0.27	1	13 +/- 10	10 +/- 11
scl0231724.1_307	Rad9b	ENSMUSG00000038569	RAD9 homolog B	459	0.27	1	9 +/- 9	16 +/- 12
scl0078926.2_61	Gas2l1	ENSMUSG00000034201	growth arrest-specific 2 like 1	459	0.27	1	13 +/- 11	6 +/- 10
scl071887.10_10	Ppm1j	ENSMUSG00000002228	protein phosphatase 1J	459	0.27	1	11 +/- 10	13 +/- 11
scl24182.1.2197_83	AK031521	NA	NA	459	0.27	1	5 +/- 10	0 +/- 10
scl0001550.1_29	Rhot1	ENSMUSG00000017686	ras homolog gene family, member T1	459	0.27	1	16 +/- 12	11 +/- 11
scl38698.8_214	Cnn2	ENSMUSG00000004665	calponin 2	459	0.27	1	7 +/- 11	1 +/- 10
scl0067948.1_302	Fbxo28	ENSMUSG00000047539	F-box protein 28	459	0.27	1	5 +/- 10	0 +/- 9
scl47884.11.17_1	Sqle	ENSMUSG00000022351	squalene epoxidase	459	0.27	1	13 +/- 11	10 +/- 11
scl47301.1.1_254	AK017390	NA	NA	459	0.27	1	17 +/- 12	27 +/- 12
GI_38074736	Mod1	NA	NA	459	0.27	1	4 +/- 9	43 +/- 13
scl50963.5.1_38	Mrpl28	ENSMUSG00000024181	mitochondrial ribosomal protein L28	459	0.27	1	4 +/- 10	2 +/- 10
scl020716.5_261	Serpina3k	ENSMUSG00000058207	serine (or cysteine) peptidase inhibitor, clade A, member 3K	459	0.28	1	9 +/- 8	83 +/- 9
scl0213262.16_329	Fstl5	ENSMUSG00000034098	follistatin-like 5	459	0.28	1	14 +/- 11	50 +/- 12
scl0068151.2_330	Gpr177	NA	NA	459	0.28	1	14 +/- 11	18 +/- 11
scl000941.1_0	Ndufs2	ENSMUSG00000013593	NADH dehydrogenase (ubiquinone) Fe-S protein 2	459	0.28	1	4 +/- 9	45 +/- 12
scl31127.23.1_1	Unc45a	ENSMUSG00000030533	unc-45 homolog A (C. elegans)	459	0.28	1	3 +/- 9	55 +/- 12
scl40969.4.1_13	Mrpl10	ENSMUSG00000001445	mitochondrial ribosomal protein L10	459	0.28	1	5 +/- 9	32 +/- 13
scl36699.4_279	Myo5a	ENSMUSG00000034593	myosin VA	459	0.28	1	2 +/- 9	35 +/- 10
scl16146.28_80	Lamc1	ENSMUSG00000026478	laminin, gamma 1	459	0.28	1	12 +/- 10	32 +/- 13
scl18985.4_291	Slc35c1	ENSMUSG00000049922	solute carrier family 35, member C1	459	0.28	1	4 +/- 9	27 +/- 12
scl17724.1_126	AK016730	NA	NA	459	0.28	1	5 +/- 9	23 +/- 12
GI_38084903	Gm98	NA	NA	459	0.28	1	5 +/- 9	24 +/- 12
ri|7420404O03|PX00650P09|AK078662|2153	E330016A19Rik	NA	NA	459	0.28	1	13 +/- 11	49 +/- 12
scl29619.14.1344_171	Slc6a11	ENSMUSG00000030307	solute carrier family 6 (neurotransmitter transporter, GABA), member 11	459	0.28	1	4 +/- 9	16 +/- 11
scl44625.4_223	Tppp	ENSMUSG00000021573	tubulin polymerization promoting protein	459	0.28	1	13 +/- 11	6 +/- 10
scl39853.10_345	5730455P16Rik	ENSMUSG00000057181	RIKEN cDNA 5730455P16 gene	459	0.28	1	8 +/- 11	8 +/- 9
scl000719.1_1	Tmem188	NA	NA	459	0.28	1	17 +/- 12	5 +/- 10
scl23200.12_402	2810046L04Rik	NA	NA	459	0.28	1	16 +/- 12	18 +/- 12
scl34125.2_74	Trappc5	ENSMUSG00000040236	trafficking protein particle complex 5	459	0.28	1	11 +/- 10	17 +/- 12
scl42789.1.791_155	Meg3	ENSMUSG00000021268	maternally expressed 3	459	0.28	1	4 +/- 9	30 +/- 13
scl00217869.1_91	Eif5	ENSMUSG00000021282	eukaryotic translation initiation factor 5	459	0.28	1	19 +/- 12	14 +/- 11
scl23204.1.453_17	AK081767	NA	NA	459	0.28	1	7 +/- 11	1 +/- 10
scl32175.1_62	AK011524	NA	NA	459	0.28	1	4 +/- 9	22 +/- 12
GI_6671508	Actb	ENSMUSG00000029580	actin, beta	459	0.28	1	8 +/- 11	2 +/- 10
scl0003599.1_3	Fbxl12	ENSMUSG00000066892	F-box and leucine-rich repeat protein 12	459	0.28	1	12 +/- 10	23 +/- 12
GI_38077576	AK136654	NA	NA	459	0.28	1	6 +/- 9	19 +/- 12
scl31670.15.1_26	Clptm1	ENSMUSG00000002981	cleft lip and palate associated transmembrane protein 1	459	0.28	1	15 +/- 11	12 +/- 11
scl43811.10.1_104	Mterfd1	NA	NA	459	0.28	1	15 +/- 10	22 +/- 12
scl0002068.1_1	Casp6	ENSMUSG00000027997	caspase 6	459	0.28	1	10 +/- 10	19 +/- 12
ri|5330401L20|PX00053A17|AK030358|2575	Nrp1	ENSMUSG00000025810	neuropilin 1	459	0.28	1	12 +/- 11	1 +/- 10
scl52384.15.1_68	Obfc1	ENSMUSG00000042694	oligonucleotide/oligosaccharide-binding fold containing 1	459	0.28	1	5 +/- 10	0 +/- 10
scl46905.12_121	Cyb5r3	ENSMUSG00000018042	cytochrome b5 reductase 3	459	0.28	1	17 +/- 12	12 +/- 11
scl33408.13_324	Ctcf	ENSMUSG00000005698	CCCTC-binding factor	459	0.28	1	16 +/- 11	10 +/- 10
scl37360.7.1_32	Myl6b	ENSMUSG00000039824	myosin, light polypeptide 6B	459	0.28	1	7 +/- 9	15 +/- 11
scl0109032.3_2	Sp110	ENSMUSG00000070034	Sp110 nuclear body protein	459	0.28	1	14 +/- 11	13 +/- 11
scl49220.17.1_70	Lmln	ENSMUSG00000022802	leishmanolysin-like (metallopeptidase M8 family)	459	0.28	1	7 +/- 9	21 +/- 12
scl0330763.3_104	AK042788	NA	NA	459	0.28	1	15 +/- 11	17 +/- 11
scl25429.7.1_20	Slc44a1	ENSMUSG00000028412	solute carrier family 44, member 1	459	0.28	1	13 +/- 10	17 +/- 11
scl0016150.2_179	IKKbeta	NA	NA	459	0.28	1	7 +/- 10	22 +/- 12
scl54992.7_32	Ube2a	ENSMUSG00000016308	ubiquitin-conjugating enzyme E2A	459	0.28	1	13 +/- 11	3 +/- 10
scl45910.20.1_29	4930452B06Rik	ENSMUSG00000021747	RIKEN cDNA 4930452B06 gene	459	0.28	1	6 +/- 10	0 +/- 10
scl0077320.1_201	Cdh10	ENSMUSG00000022321	cadherin 10	459	0.28	1	6 +/- 10	0 +/- 10
scl0258982.1_161	Olfr1272	ENSMUSG00000075061	olfactory receptor 1272	459	0.28	1	13 +/- 11	9 +/- 11
scl026408.25_3	Map3k5	ENSMUSG00000071369	mitogen-activated protein kinase kinase kinase 5	459	0.28	1	11 +/- 11	3 +/- 10
scl39224.5.1_30	Stra13	ENSMUSG00000025144	stimulated by retinoic acid 13	459	0.28	1	12 +/- 10	16 +/- 12
scl0021859.1_62	Timp3	ENSMUSG00000020044	tissue inhibitor of metalloproteinase 3	459	0.28	1	7 +/- 9	19 +/- 12
scl019777.1_32	C80913	NA	NA	459	0.28	1	8 +/- 10	0 +/- 10
scl00215474.2_178	Sec22c	ENSMUSG00000061536	SEC22 vesicle trafficking protein homolog C (S. cerevisiae)	459	0.28	1	6 +/- 9	16 +/- 12
scl46621.4.1_1	Sntn	ENSMUSG00000044772	sentan, cilia apical structure protein	459	0.28	1	8 +/- 10	16 +/- 12
scl012388.2_103	Ctnnd1	ENSMUSG00000034101	catenin (cadherin associated protein), delta 1	459	0.28	1	21 +/- 12	7 +/- 10
scl21634.2.1_1	Prmt6	ENSMUSG00000049300	protein arginine N-methyltransferase 6	459	0.28	1	8 +/- 10	19 +/- 12
scl47266.1.808_307	AK051059	NA	NA	459	0.28	1	12 +/- 10	13 +/- 11
scl075599.1_102	Pcdh1	ENSMUSG00000051375	protocadherin 1	459	0.28	1	7 +/- 9	17 +/- 12
scl076257.1_48	Slc38a3	ENSMUSG00000010064	solute carrier family 38, member 3	459	0.28	1	12 +/- 11	5 +/- 10
scl23881.4_371	Dem1	NA	NA	459	0.28	1	13 +/- 10	18 +/- 11
scl21410.6.2_5	Bxdc5	NA	NA	459	0.28	1	8 +/- 10	1 +/- 10
scl43672.16_14	Scamp1	ENSMUSG00000021687	secretory carrier membrane protein 1	459	0.28	1	6 +/- 9	23 +/- 12
scl26195.5_634	Cmklr1	ENSMUSG00000042190	chemokine-like receptor 1	459	0.28	1	16 +/- 11	13 +/- 11
scl27427.17_318	Ttc28	ENSMUSG00000033209	tetratricopeptide repeat domain 28	459	0.28	1	14 +/- 10	12 +/- 11
scl41696.36.110_2	Slit3	ENSMUSG00000056427	slit homolog 3 (Drosophila)	459	0.28	1	14 +/- 11	4 +/- 10
scl937.1.1_6	V1rc24	NA	NA	459	0.28	1	8 +/- 10	16 +/- 12
scl37743.3.1_54	Polr2e	ENSMUSG00000004667	polymerase (RNA) II (DNA directed) polypeptide E	459	0.28	1	6 +/- 10	0 +/- 10
scl21615.11.1_4	Slc30a7	ENSMUSG00000054414	solute carrier family 30 (zinc transporter), member 7	459	0.28	1	6 +/- 10	0 +/- 10
scl40101.5.1_17	Prr6	NA	NA	459	0.28	1	9 +/- 11	1 +/- 10
scl18753.5.1_12	6030465E24Rik	NA	NA	459	0.28	1	12 +/- 11	8 +/- 11
scl19466.5_125	Asb6	ENSMUSG00000039483	ankyrin repeat and SOCS box-containing 6	459	0.28	1	14 +/- 11	7 +/- 10
scl0000110.1_1	Nos3	ENSMUSG00000028978	nitric oxide synthase 3, endothelial cell	459	0.28	1	13 +/- 10	10 +/- 11
scl000572.1_890	Cnot7	ENSMUSG00000031601	CCR4-NOT transcription complex, subunit 7	459	0.28	1	9 +/- 10	16 +/- 11
scl16123.5_190	Mr1	ENSMUSG00000026471	major histocompatibility complex, class I-related	459	0.28	1	8 +/- 10	37 +/- 13
scl34118.6.1_7	Snapc2	ENSMUSG00000011837	small nuclear RNA activating complex, polypeptide 2	459	0.28	1	10 +/- 10	14 +/- 11
scl49996.9.1_82	Csnk2b	ENSMUSG00000024387	casein kinase 2, beta polypeptide	459	0.28	1	12 +/- 11	11 +/- 11
scl00069.1_121	AK007653	NA	NA	459	0.28	1	16 +/- 11	11 +/- 11
scl48967.5_235	Rbm11	ENSMUSG00000032940	RNA binding motif protein 11	459	0.28	1	12 +/- 10	10 +/- 11
scl36809.14.1_41	Clpx	ENSMUSG00000015357	caseinolytic mitochondrial matrix peptidase chaperone subunit	459	0.28	1	5 +/- 10	0 +/- 10
scl16911.32.1_67	Bai3	NA	NA	459	0.28	1	13 +/- 11	6 +/- 10
scl015931.1_0	BC160215	NA	NA	459	0.28	1	12 +/- 10	13 +/- 11
scl012521.1_26	Cd82	ENSMUSG00000027215	CD82 antigen	459	0.28	1	5 +/- 10	0 +/- 10
scl068552.1_11	1110003E01Rik	NA	NA	459	0.28	1	12 +/- 11	0 +/- 9
scl25432.1.1_21	AK020287	NA	NA	459	0.28	1	8 +/- 11	0 +/- 9
scl00246316.2_198	Lgi2	ENSMUSG00000039252	leucine-rich repeat LGI family, member 2	459	0.28	1	8 +/- 10	29 +/- 12
scl36336.8_440	Rpl14	ENSMUSG00000025794	ribosomal protein L14	459	0.28	1	15 +/- 11	40 +/- 12
scl39711.41_251	Cacna1g	ENSMUSG00000020866	calcium channel, voltage-dependent, T type, alpha 1G subunit	459	0.28	1	14 +/- 11	6 +/- 10
ri|4930578F03|PX00036H22|AK016299|1354	Adal	ENSMUSG00000027259	adenosine deaminase-like	459	0.28	1	3 +/- 10	6 +/- 10
scl17645.6_17	Asb1	ENSMUSG00000026311	ankyrin repeat and SOCS box-containing 1	459	0.29	1	2 +/- 8	65 +/- 12
scl0075745.1_310	Rian	ENSMUSG00000097451	RNA imprinted and accumulated in nucleus	459	0.29	1	7 +/- 10	28 +/- 10
scl011647.1_76	Alpl	ENSMUSG00000028766	alkaline phosphatase, liver/bone/kidney	459	0.29	1	11 +/- 11	31 +/- 12
scl38645.19.1_1	Tle2	ENSMUSG00000034771	transducin-like enhancer of split 2, homolog of Drosophila E(spl)	459	0.29	1	16 +/- 12	8 +/- 10
scl31469.3.28_7	Nudt19	ENSMUSG00000034875	nudix (nucleoside diphosphate linked moiety X)-type motif 19	459	0.29	1	4 +/- 8	48 +/- 10
scl0072932.1_309	AK013557	NA	NA	459	0.29	1	9 +/- 11	1 +/- 9
scl44365.26.1_123	Dhx29	ENSMUSG00000042426	DEAH (Asp-Glu-Ala-His) box polypeptide 29	459	0.29	1	4 +/- 9	24 +/- 12
scl19306.1.1_140	AK014088	NA	NA	459	0.29	1	8 +/- 10	26 +/- 12
scl15870.13_49	Akt3	ENSMUSG00000019699	thymoma viral proto-oncogene 3	459	0.29	1	16 +/- 12	15 +/- 11
scl39450.5.4_10	Gh	ENSMUSG00000020713	growth hormone	459	0.29	1	6 +/- 9	30 +/- 13
scl22435.1.2_91	BC007180	NA	NA	459	0.29	1	5 +/- 10	3 +/- 10
scl0004167.1_44	Srrt	ENSMUSG00000037364	serrate RNA effector molecule homolog (Arabidopsis)	459	0.29	1	11 +/- 11	19 +/- 12
scl52526.2_193	Ppp1r3c	ENSMUSG00000067279	protein phosphatase 1, regulatory (inhibitor) subunit 3C	459	0.29	1	12 +/- 11	2 +/- 10
scl0021372.2_85	Tbl1x	ENSMUSG00000025246	transducin (beta)-like 1 X-linked	459	0.29	1	7 +/- 11	1 +/- 9
GI_25048036	Gm561	ENSMUSG00000074754	predicted gene 561	459	0.29	1	12 +/- 11	22 +/- 12
scl0102141.2_29	Snx25	ENSMUSG00000038291	sorting nexin 25	459	0.29	1	7 +/- 9	23 +/- 12
scl000543.1_10	1810055E12Rik	NA	NA	459	0.29	1	7 +/- 11	1 +/- 9
scl22594.5_86	Ints12	ENSMUSG00000028016	integrator complex subunit 12	459	0.29	1	20 +/- 12	10 +/- 10
scl0319475.1_238	Zfp672	ENSMUSG00000049755	zinc finger protein 672	459	0.29	1	13 +/- 11	8 +/- 10
scl0004124.1_11	Anapc5	ENSMUSG00000029472	anaphase-promoting complex subunit 5	459	0.29	1	8 +/- 9	24 +/- 12
scl17660.30_146	Lrrfip1	ENSMUSG00000026305	leucine rich repeat (in FLII) interacting protein 1	459	0.29	1	8 +/- 10	24 +/- 12
scl0016949.2_233	Loxl1	ENSMUSG00000032334	lysyl oxidase-like 1	459	0.29	1	6 +/- 9	27 +/- 12
scl22402.6.1_12	Mrps28	ENSMUSG00000040269	mitochondrial ribosomal protein S28	459	0.29	1	10 +/- 11	0 +/- 9
scl0013488.2_233	Drd1a	NA	NA	459	0.29	1	5 +/- 9	22 +/- 12
scl0001908.1_5	Pmm2	ENSMUSG00000022711	phosphomannomutase 2	459	0.29	1	14 +/- 11	11 +/- 11
GI_21362284	Wdr33	ENSMUSG00000024400	WD repeat domain 33	459	0.29	1	14 +/- 10	17 +/- 12
ri|A430010E21|PX00133N10|AK039823|478	AK039823	NA	NA	459	0.29	1	15 +/- 11	12 +/- 11
scl51012.2.1_3	AK011460	NA	NA	459	0.29	1	13 +/- 10	17 +/- 11
scl31352.29.1_249	Ush1c	ENSMUSG00000030838	Usher syndrome 1C	459	0.29	1	10 +/- 10	15 +/- 11
scl0002671.1_55	Mrpl37	ENSMUSG00000028622	mitochondrial ribosomal protein L37	459	0.29	1	12 +/- 10	16 +/- 11
scl37604.17_345	Nedd1	ENSMUSG00000019988	neural precursor cell expressed, developmentally down-regulated gene 1	459	0.29	1	10 +/- 10	12 +/- 11
scl0003424.1_2300	Tgfbr2	ENSMUSG00000032440	transforming growth factor, beta receptor II	459	0.29	1	12 +/- 10	12 +/- 11
scl35383.2.97_43	Rbm15b	ENSMUSG00000074102	RNA binding motif protein 15B	459	0.29	1	5 +/- 10	0 +/- 10
scl083796.1_300	Smarcd2	ENSMUSG00000078619	SWI/SNF related, matrix associated, actin dependent regulator of chromatin, subfamily d, member 2	459	0.29	1	4 +/- 10	7 +/- 10
scl33083.2_257	AK006720	NA	NA	459	0.29	1	13 +/- 11	6 +/- 10
scl0002813.1_29	Tmem53	ENSMUSG00000048772	transmembrane protein 53	459	0.29	1	13 +/- 11	7 +/- 11
scl26990.11.129_69	Arpc1a	ENSMUSG00000029621	actin related protein 2/3 complex, subunit 1A	459	0.29	1	13 +/- 11	12 +/- 11
scl0236790.10_21	Ddx26b	ENSMUSG00000035967	DEAD/H (Asp-Glu-Ala-Asp/His) box polypeptide 26B	459	0.29	1	13 +/- 10	13 +/- 11
scl0001064.1_3	Hoxa9	ENSMUSG00000038227	homeobox A9	459	0.29	1	15 +/- 11	12 +/- 11
scl23576.15_45	9030409G11Rik	NA	NA	459	0.29	1	13 +/- 11	10 +/- 11
scl067769.10_58	Gpatch2	ENSMUSG00000039210	G patch domain containing 2	459	0.29	1	7 +/- 9	16 +/- 12
scl067706.2_5	Tmem179b	NA	NA	459	0.29	1	10 +/- 10	20 +/- 12
scl18975.13.1_98	Accs	ENSMUSG00000040272	1-aminocyclopropane-1-carboxylate synthase (non-functional)	459	0.29	1	8 +/- 9	15 +/- 12
scl53840.18.1_253	Sytl4	ENSMUSG00000031255	synaptotagmin-like 4	459	0.29	1	14 +/- 10	18 +/- 11
scl0003546.1_11	Shisa5	ENSMUSG00000025647	shisa family member 5	459	0.29	1	14 +/- 11	13 +/- 11
scl0003355.1_74	Dlgap4	ENSMUSG00000061689	discs, large homolog-associated protein 4 (Drosophila)	459	0.29	1	14 +/- 11	14 +/- 11
scl32047.10.1_56	Doc2a	ENSMUSG00000052301	double C2, alpha	459	0.29	1	14 +/- 10	17 +/- 11
GI_38086153	Otud6b	ENSMUSG00000040550	OTU domain containing 6B	459	0.29	1	10 +/- 10	14 +/- 11
scl30640.6_131	Zfp629	ENSMUSG00000045639	zinc finger protein 629	459	0.29	1	9 +/- 10	17 +/- 12
scl0002561.1_38	Xrcc6	ENSMUSG00000022471	X-ray repair complementing defective repair in Chinese hamster cells 6	459	0.29	1	15 +/- 11	12 +/- 11
scl52589.1_716	9930021J03Rik	ENSMUSG00000046138	RIKEN cDNA 9930021J03 gene	459	0.29	1	15 +/- 11	23 +/- 12
scl29492.60.1_120	Vwf	ENSMUSG00000001930	Von Willebrand factor homolog	459	0.29	1	4 +/- 10	4 +/- 10
scl00103978.2_293	Gpc5	ENSMUSG00000022112	glypican 5	459	0.29	1	4 +/- 10	4 +/- 10
scl51486.3_298	Spry4	ENSMUSG00000024427	sprouty homolog 4 (Drosophila)	459	0.29	1	5 +/- 10	0 +/- 10
scl075202.4_27	4930546H06Rik	NA	NA	459	0.29	1	6 +/- 11	1 +/- 9
scl0320951.8_63	Pisd	ENSMUSG00000023452	phosphatidylserine decarboxylase	459	0.29	1	15 +/- 11	21 +/- 12
scl49691.9_66	Rab22B	NA	NA	459	0.29	1	5 +/- 9	24 +/- 12
ri|2810409M01|ZX00055F22|AK013060|1182	Fyco1	ENSMUSG00000025241	FYVE and coiled-coil domain containing 1	459	0.29	1	11 +/- 10	48 +/- 11
scl0074239.2_292	Iqce	ENSMUSG00000036555	IQ motif containing E	459	0.29	1	3 +/- 10	12 +/- 10
scl40427.5_4	Ccdc85a	ENSMUSG00000032878	coiled-coil domain containing 85A	459	0.29	1	14 +/- 11	12 +/- 10
scl0064934.1_269	Pes1	ENSMUSG00000020430	pescadillo homolog 1, containing BRCT domain (zebrafish)	459	0.29	1	10 +/- 11	0 +/- 9
scl38232.7_17	Map3k7ip2	NA	NA	459	0.29	1	7 +/- 10	30 +/- 12
scl0018640.2_76	Pfkfb2	ENSMUSG00000026409	6-phosphofructo-2-kinase/fructose-2,6-biphosphatase 2	459	0.29	1	6 +/- 10	0 +/- 9
scl069408.2_13	Dnajc17	ENSMUSG00000034278	DnaJ (Hsp40) homolog, subfamily C, member 17	459	0.29	1	14 +/- 11	24 +/- 12
GI_38079711	2310015A05Rik	NA	NA	459	0.29	1	4 +/- 10	1 +/- 9
scl073683.2_12	Atg16l2	ENSMUSG00000047767	autophagy related 16-like 2 (S. cerevisiae)	459	0.29	1	2 +/- 10	17 +/- 11
scl18791.2_626	Pla2g4e	ENSMUSG00000050211	phospholipase A2, group IVE	459	0.29	1	1 +/- 6	91 +/- 9
scl00215690.2_326	Nav1	ENSMUSG00000009418	neuron navigator 1	459	0.3	1	11 +/- 10	64 +/- 11
scl50840.17.1_5	Rgl2	ENSMUSG00000041354	ral guanine nucleotide dissociation stimulator-like 2	459	0.3	1	3 +/- 10	14 +/- 10
scl43153.6_180	Atp5s	ENSMUSG00000054894	ATP synthase, H+ transporting, mitochondrial F0 complex, subunit S	459	0.3	1	15 +/- 12	22 +/- 12
scl0140492.8_64	Kcnn2	ENSMUSG00000054477	potassium intermediate/small conductance calcium-activated channel, subfamily N, member 2	459	0.3	1	4 +/- 9	33 +/- 13
scl015122.2_7	Hba-a1	ENSMUSG00000069919	hemoglobin alpha, adult chain 1	459	0.3	1	12 +/- 11	15 +/- 11
scl0227292.12_53	Ctdsp1	ENSMUSG00000026176	CTD (carboxy-terminal domain, RNA polymerase II, polypeptide A) small phosphatase 1	459	0.3	1	21 +/- 12	9 +/- 10
scl31603.36.1_19	Ltbp4	ENSMUSG00000040488	latent transforming growth factor beta binding protein 4	459	0.3	1	15 +/- 11	21 +/- 12
ri|2610306O03|ZX00062K09|AK011999|779	Pde4b	ENSMUSG00000028525	phosphodiesterase 4B, cAMP specific	459	0.3	1	17 +/- 12	12 +/- 11
GI_38079527	Anapc5	ENSMUSG00000029472	anaphase-promoting complex subunit 5	459	0.3	1	17 +/- 12	22 +/- 12
scl0067038.2_157	2010109I03Rik	ENSMUSG00000063522	RIKEN cDNA 2010109I03 gene	459	0.3	1	12 +/- 11	14 +/- 11
scl000796.1_112	Atic	ENSMUSG00000026192	5-aminoimidazole-4-carboxamide ribonucleotide formyltransferase/IMP cyclohydrolase	459	0.3	1	7 +/- 10	32 +/- 13
scl42548.13_47	Pik3cg	ENSMUSG00000020573	phosphoinositide-3-kinase, catalytic, gamma polypeptide	459	0.3	1	13 +/- 10	13 +/- 11
scl000855.1_12	Hdlbp	ENSMUSG00000034088	high density lipoprotein (HDL) binding protein	459	0.3	1	4 +/- 9	20 +/- 12
scl45555.8.1_9	MBOCT	NA	NA	459	0.3	1	9 +/- 10	20 +/- 11
scl54777.3.514_32	AK050859	NA	NA	459	0.3	1	13 +/- 11	8 +/- 10
scl49144.8.1_51	Igsf11	ENSMUSG00000022790	immunoglobulin superfamily, member 11	459	0.3	1	9 +/- 10	23 +/- 12
scl29676.3_683	Setmar	ENSMUSG00000034639	SET domain without mariner transposase fusion	459	0.3	1	11 +/- 11	0 +/- 9
GI_25031436	Spin2	NA	NA	459	0.3	1	5 +/- 9	23 +/- 12
scl43180.27.1_0	Ctage5	ENSMUSG00000021000	CTAGE family, member 5	459	0.3	1	7 +/- 10	18 +/- 11
scl20708.1.1_309	AK008706	NA	NA	459	0.3	1	7 +/- 10	22 +/- 12
scl16689.10.1_137	Mdh1b	ENSMUSG00000025963	malate dehydrogenase 1B, NAD (soluble)	459	0.3	1	12 +/- 10	14 +/- 11
scl077893.4_281	Bcorl1	ENSMUSG00000036959	BCL6 co-repressor-like 1	459	0.3	1	15 +/- 11	11 +/- 11
scl44724.21.5_2	Ddx46	ENSMUSG00000021500	DEAD (Asp-Glu-Ala-Asp) box polypeptide 46	459	0.3	1	5 +/- 9	15 +/- 11
scl0213491.1_175	D4Ertd22e	NA	NA	459	0.3	1	8 +/- 11	0 +/- 10
scl0229622.3_21	Pde4dip	ENSMUSG00000038170	phosphodiesterase 4D interacting protein (myomegalin)	459	0.3	1	4 +/- 10	0 +/- 10
IGHV3S2_M12435_Ig_heavy_variable_3S2_32	abParts	NA	NA	459	0.3	1	12 +/- 10	23 +/- 12
scl11601.1.1_172	Lrrc40	ENSMUSG00000063052	leucine rich repeat containing 40	459	0.3	1	12 +/- 10	23 +/- 12
scl51014.5.1_34	9930021D14Rik	NA	NA	459	0.3	1	14 +/- 11	13 +/- 11
scl38668.4.1_30	Gadd45b	ENSMUSG00000015312	growth arrest and DNA-damage-inducible 45 beta	459	0.3	1	11 +/- 10	18 +/- 11
scl31608.7.1_161	Itpkc	ENSMUSG00000003752	inositol 1,4,5-trisphosphate 3-kinase C	459	0.3	1	12 +/- 11	21 +/- 12
scl52212.12.1_126	Dsg4	ENSMUSG00000001804	desmoglein 4	459	0.3	1	9 +/- 10	15 +/- 12
scl094214.11_38	Spock2	ENSMUSG00000058297	sparc/osteonectin, cwcv and kazal-like domains proteoglycan 2	459	0.3	1	15 +/- 11	14 +/- 11
scl39528.4.1_37	Meox1	ENSMUSG00000001493	mesenchyme homeobox 1	459	0.3	1	12 +/- 11	11 +/- 11
ri|A130004L09|PX00121K07|AK037305|3879	AK037305	NA	NA	459	0.3	1	14 +/- 11	14 +/- 11
scl40892.11.1_309	Tubg2	ENSMUSG00000045007	tubulin, gamma 2	459	0.3	1	5 +/- 10	2 +/- 10
ri|1700047H18|ZX00075C09|AK006710|661	1700001C02Rik	ENSMUSG00000029182	RIKEN cDNA 1700001C02 gene	459	0.3	1	11 +/- 11	7 +/- 10
scl33910.4_161	Ppp1r3b	ENSMUSG00000046794	protein phosphatase 1, regulatory (inhibitor) subunit 3B	459	0.3	1	9 +/- 9	19 +/- 12
scl0105445.1_143	Dock9	ENSMUSG00000025558	dedicator of cytokinesis 9	459	0.3	1	14 +/- 10	19 +/- 12
scl0001717.1_819	Sema6b	ENSMUSG00000001227	sema domain, transmembrane domain (TM), and cytoplasmic domain, (semaphorin) 6B	459	0.3	1	15 +/- 11	8 +/- 11
scl054189.18_28	Rabep1	ENSMUSG00000020817	rabaptin, RAB GTPase binding effector protein 1	459	0.3	1	14 +/- 12	1 +/- 10
scl0381393.1_199	4921509C19Rik	ENSMUSG00000061525	RIKEN cDNA 4921509C19 gene	459	0.3	1	13 +/- 11	11 +/- 11
mtDNA_COXI	DQ539915	NA	NA	459	0.3	1	16 +/- 11	20 +/- 12
scl33224.1_436	AK033985	NA	NA	459	0.3	1	14 +/- 11	9 +/- 11
scl25422.12_359	DV071973	NA	NA	459	0.3	1	16 +/- 11	12 +/- 11
scl0394433.1_293	Ugt1a6a	ENSMUSG00000054545	UDP glucuronosyltransferase 1 family, polypeptide A6A	459	0.3	1	10 +/- 10	19 +/- 12
scl6278.1.1_308	Olfr1494	ENSMUSG00000050865	olfactory receptor 1494	459	0.3	1	6 +/- 10	14 +/- 11
scl32043.3_256	AI467606	ENSMUSG00000045165	expressed sequence AI467606	459	0.3	1	6 +/- 9	17 +/- 12
scl00229782.2_107	Slc35a3	ENSMUSG00000027957	solute carrier family 35 (UDP-N-acetylglucosamine (UDP-GlcNAc) transporter), member 3	459	0.3	1	14 +/- 11	12 +/- 11
scl43982.12.1_68	Shc3	ENSMUSG00000021448	src homology 2 domain-containing transforming protein C3	459	0.3	1	17 +/- 11	14 +/- 11
scl0059042.1_160	Cope	ENSMUSG00000055681	coatomer protein complex, subunit epsilon	459	0.3	1	15 +/- 11	9 +/- 11
scl53097.1.2_25	Scd4	ENSMUSG00000050195	stearoyl-coenzyme A desaturase 4	459	0.3	1	16 +/- 10	24 +/- 12
scl33121.3_245	Zfp524	ENSMUSG00000051184	zinc finger protein 524	459	0.3	1	12 +/- 10	13 +/- 11
GI_38076565	BM936458	NA	NA	459	0.3	1	14 +/- 11	10 +/- 11
scl51584.10_193	Slc39a6	ENSMUSG00000024270	solute carrier family 39 (metal ion transporter), member 6	459	0.3	1	14 +/- 11	9 +/- 11
scl097130.1_10	C77080	ENSMUSG00000050390	expressed sequence C77080	459	0.3	1	11 +/- 11	4 +/- 10
scl0209195.6_234	Clic6	ENSMUSG00000022949	chloride intracellular channel 6	459	0.3	1	8 +/- 9	18 +/- 12
GI_38083813	Grxcr2	ENSMUSG00000073574	glutaredoxin, cysteine rich 2	459	0.3	1	8 +/- 10	14 +/- 11
scl056292.1_247	Ard1a	NA	NA	459	0.3	1	15 +/- 11	5 +/- 10
ri|D630002J18|PX00195H13|AK052598|1116	AK052598	NA	NA	459	0.3	1	8 +/- 10	2 +/- 10
scl0338364.2_175	Trim65	ENSMUSG00000054517	tripartite motif-containing 65	459	0.3	1	10 +/- 10	17 +/- 12
GI_38090729		ENSMUSG00000106534	NA	459	0.3	1	13 +/- 10	15 +/- 12
ri|4933402K11|PX00019K15|AK030155|1570	Pmp2	ENSMUSG00000052468	peripheral myelin protein 2	459	0.3	1	12 +/- 10	18 +/- 12
scl39118.3_388	Perp	ENSMUSG00000019851	PERP, TP53 apoptosis effector	459	0.3	1	14 +/- 11	15 +/- 11
scl22972.7.87_15	Pmvk	ENSMUSG00000027952	phosphomevalonate kinase	459	0.3	1	10 +/- 11	4 +/- 10
scl0230868.3_5	Igsf21	ENSMUSG00000040972	immunoglobulin superfamily, member 21	459	0.3	1	8 +/- 10	2 +/- 10
scl33218.13.1_6	Cdh15	ENSMUSG00000031962	cadherin 15	459	0.3	1	13 +/- 10	14 +/- 11
scl37287.1.1_235	Phxr4	ENSMUSG00000031802	per-hexamer repeat gene 4	459	0.3	1	10 +/- 11	2 +/- 10
scl00108954.2_8	Ppp1r15b	ENSMUSG00000046062	protein phosphatase 1, regulatory (inhibitor) subunit 15b	459	0.3	1	4 +/- 9	15 +/- 12
scl013480.1_38	Dpm1	ENSMUSG00000078919	dolichol-phosphate (beta-D) mannosyltransferase 1	459	0.3	1	10 +/- 10	15 +/- 11
ri|1700124I24|ZX00078N15|AK007267|653	AK007267	NA	NA	459	0.3	1	12 +/- 10	13 +/- 11
scl18370.2.1_48	Wfdc15a	ENSMUSG00000051769	WAP four-disulfide core domain 15A	459	0.3	1	10 +/- 10	15 +/- 11
GI_38074644	Ppia	ENSMUSG00000071866	peptidylprolyl isomerase A	459	0.3	1	11 +/- 10	13 +/- 11
scl19375.24.1_97	Strbp	ENSMUSG00000026915	spermatid perinuclear RNA binding protein	459	0.3	1	6 +/- 9	19 +/- 12
scl0022218.1_0	Sumo1	ENSMUSG00000026021	small ubiquitin-like modifier 1	459	0.3	1	14 +/- 11	2 +/- 10
scl0319750.2_27	AK038428	NA	NA	459	0.3	1	12 +/- 11	8 +/- 11
scl0050884.1_187	Nckap1	ENSMUSG00000027002	NCK-associated protein 1	459	0.3	1	7 +/- 10	1 +/- 10
GI_20832266	BC031781	NA	NA	459	0.3	1	5 +/- 10	0 +/- 10
scl49316.10.1_12	Dnajb11	ENSMUSG00000004460	DnaJ (Hsp40) homolog, subfamily B, member 11	459	0.3	1	9 +/- 11	0 +/- 9
scl40082.1.158_86	Hs3st3a1	ENSMUSG00000047759	heparan sulfate (glucosamine) 3-O-sulfotransferase 3A1	459	0.3	1	14 +/- 11	7 +/- 10
scl23588.20_436	Plekhm2	ENSMUSG00000028917	pleckstrin homology domain containing, family M (with RUN domain) member 2	459	0.3	1	3 +/- 10	20 +/- 10
scl070827.2_21	Trak2	ENSMUSG00000026028	trafficking protein, kinesin binding 2	459	0.3	1	10 +/- 11	2 +/- 10
scl47670.15_189	Parvg	ENSMUSG00000022439	parvin, gamma	459	0.3	1	6 +/- 10	0 +/- 9
ri|C130090K21|PX00172D18|AK048634|3118	Grik1	ENSMUSG00000022935	glutamate receptor, ionotropic, kainate 1	459	0.3	1	4 +/- 10	2 +/- 9
scl068186.1_150	4632427E13Rik	ENSMUSG00000074024	RIKEN cDNA 4632427E13 gene	459	0.3	1	12 +/- 11	18 +/- 11
scl20796.12_159	Pdk1	ENSMUSG00000006494	pyruvate dehydrogenase kinase, isoenzyme 1	459	0.3	1	9 +/- 10	27 +/- 12
scl0224109.1_93	Lrrc33	NA	NA	459	0.3	1	4 +/- 10	2 +/- 10
scl33916.7_57	Tmem66	NA	NA	459	0.3	1	4 +/- 9	60 +/- 12
scl36454.7.1_119	Ihpk2	NA	NA	459	0.31	1	2 +/- 7	57 +/- 9
scl37121.13.1_3	Fez1	ENSMUSG00000032118	fasciculation and elongation protein zeta 1 (zygin I)	459	0.31	1	13 +/- 10	64 +/- 11
scl0001044.1_79	Arl6ip5	ENSMUSG00000035199	ADP-ribosylation factor-like 6 interacting protein 5	459	0.31	1	17 +/- 11	31 +/- 12
scl067894.9_40	1810055E12Rik	NA	NA	459	0.31	1	5 +/- 10	3 +/- 10
scl0001304.1_8	Tmem49	NA	NA	459	0.31	1	13 +/- 11	8 +/- 10
scl20251.8_441	Crls1	ENSMUSG00000027357	cardiolipin synthase 1	459	0.31	1	11 +/- 11	22 +/- 12
scl4960.1.1_146	AK020954	NA	NA	459	0.31	1	8 +/- 11	10 +/- 11
scl36131.12_27	Kank2	ENSMUSG00000032194	KN motif and ankyrin repeat domains 2	459	0.31	1	6 +/- 9	20 +/- 12
scl39403.17_364	Prkca	ENSMUSG00000050965	protein kinase C, alpha	459	0.31	1	2 +/- 9	36 +/- 13
scl0013844.2_257	Ephb2	ENSMUSG00000028664	Eph receptor B2	459	0.31	1	5 +/- 9	24 +/- 12
scl52269.14.333_244	Wac	ENSMUSG00000024283	WW domain containing adaptor with coiled-coil	459	0.31	1	3 +/- 9	25 +/- 10
scl0030046.1_16	Zfp292	ENSMUSG00000039967	zinc finger protein 292	459	0.31	1	16 +/- 11	10 +/- 10
scl41617.26_170	Tbc1d9b	ENSMUSG00000036644	TBC1 domain family, member 9B	459	0.31	1	11 +/- 11	16 +/- 11
scl0110391.1_29	Qdpr	ENSMUSG00000015806	quinoid dihydropteridine reductase	459	0.31	1	3 +/- 9	23 +/- 12
scl27413.2.1_8	Crybb1	ENSMUSG00000029343	crystallin, beta B1	459	0.31	1	11 +/- 11	30 +/- 12
scl0268687.2_29	Iqgap2	ENSMUSG00000021676	IQ motif containing GTPase activating protein 2	459	0.31	1	6 +/- 9	20 +/- 12
scl50907.6_346	Sfrs3	NA	NA	459	0.31	1	10 +/- 10	16 +/- 11
scl50062.15.1_11	A430107D22Rik	NA	NA	459	0.31	1	4 +/- 9	18 +/- 12
ri|C130028H04|PX00168D15|AK047994|1392	Mef2c	ENSMUSG00000005583	myocyte enhancer factor 2C	459	0.31	1	11 +/- 11	18 +/- 11
GI_38083692	Cttnbp2	ENSMUSG00000000416	cortactin binding protein 2	459	0.31	1	3 +/- 9	39 +/- 13
scl40863.8.1_1	BC030867	ENSMUSG00000034773	cDNA sequence BC030867	459	0.31	1	10 +/- 11	3 +/- 10
scl36353.20.1_79	Vill	ENSMUSG00000038775	villin-like	459	0.31	1	12 +/- 11	29 +/- 12
scl53114.14_573	Zfyve27	ENSMUSG00000018820	zinc finger, FYVE domain containing 27	459	0.31	1	5 +/- 9	17 +/- 12
ri|2610318I18|ZX00062F11|AK012046|2188	Klhl22	ENSMUSG00000022750	kelch-like 22	459	0.31	1	10 +/- 10	14 +/- 11
scl078779.1_155	Spata2L	NA	NA	459	0.31	1	14 +/- 11	9 +/- 11
scl069435.3_112	1200009F10Rik	NA	NA	459	0.31	1	10 +/- 11	0 +/- 9
scl074111.25_119	Rbm19	ENSMUSG00000029594	RNA binding motif protein 19	459	0.31	1	11 +/- 10	18 +/- 12
scl53219.1.1_281	Trpd52l3	ENSMUSG00000024815	tumor protein D52-like 3	459	0.31	1	10 +/- 10	14 +/- 11
GI_38089185	Mfhas1	ENSMUSG00000070056	malignant fibrous histiocytoma amplified sequence 1	459	0.31	1	3 +/- 9	24 +/- 12
scl0231225.1_255	Tapt1	ENSMUSG00000046985	transmembrane anterior posterior transformation 1	459	0.31	1	11 +/- 10	19 +/- 11
scl00140740.1_195	Sec63	ENSMUSG00000019802	SEC63-like (S. cerevisiae)	459	0.31	1	14 +/- 11	16 +/- 11
scl17509.2_142	Yod1	ENSMUSG00000046404	YOD1 OTU deubiquitinating enzyme 1 homologue (S. cerevisiae)	459	0.31	1	17 +/- 11	14 +/- 11
scl23111.16.8_12	Gfm1	ENSMUSG00000027774	G elongation factor, mitochondrial 1	459	0.31	1	4 +/- 9	20 +/- 12
scl27877.10.4_15	Lyar	ENSMUSG00000067367	Ly1 antibody reactive clone	459	0.31	1	6 +/- 9	20 +/- 12
ri|1110055O21|ZA00008M11|AK027978|943	Angptl1	ENSMUSG00000033544	angiopoietin-like 1	459	0.31	1	6 +/- 9	17 +/- 12
scl20607.26.1_16	Phf21a	ENSMUSG00000058318	PHD finger protein 21A	459	0.31	1	6 +/- 9	17 +/- 12
scl00211484.2_131	Tsga10	ENSMUSG00000060771	testis specific 10	459	0.31	1	10 +/- 10	18 +/- 12
scl36720.3_483	Pygo1	ENSMUSG00000034910	pygopus 1	459	0.31	1	9 +/- 10	17 +/- 12
scl44174.1.1_69	Hdgfl1	ENSMUSG00000045835	hepatoma derived growth factor-like 1	459	0.31	1	10 +/- 10	15 +/- 11
scl31887.19.1_2	Eps8l2	ENSMUSG00000025504	EPS8-like 2	459	0.31	1	13 +/- 10	14 +/- 11
scl000342.1_1	Rbm26	ENSMUSG00000022119	RNA binding motif protein 26	459	0.31	1	10 +/- 10	16 +/- 12
scl31426.8.1_131	Zfp715	ENSMUSG00000012640	zinc finger protein 715	459	0.31	1	11 +/- 11	7 +/- 11
GI_38090321	AU019823	ENSMUSG00000059820	expressed sequence AU019823	459	0.31	1	16 +/- 11	8 +/- 11
scl34824.1.1_175	AK020424	NA	NA	459	0.31	1	14 +/- 10	16 +/- 11
scl0001861.1_4	Ppm1f	ENSMUSG00000026181	protein phosphatase 1F (PP2C domain containing)	459	0.31	1	14 +/- 11	13 +/- 11
scl0067095.2_71	Trak1	ENSMUSG00000032536	trafficking protein, kinesin binding 1	459	0.31	1	9 +/- 10	20 +/- 12
scl53468.1.1_230	AK017417	NA	NA	459	0.31	1	14 +/- 11	13 +/- 11
scl0004111.1_2	Ptpn12	ENSMUSG00000028771	protein tyrosine phosphatase, non-receptor type 12	459	0.31	1	7 +/- 9	19 +/- 12
scl51588.6_379	Ino80c	ENSMUSG00000047989	INO80 complex subunit C	459	0.31	1	10 +/- 10	21 +/- 12
scl0320267.1_220	Fubp3	ENSMUSG00000026843	far upstream element (FUSE) binding protein 3	459	0.31	1	9 +/- 11	2 +/- 9
scl0001319.1_14	IHABP	NA	NA	459	0.31	1	10 +/- 10	15 +/- 12
scl057275.1_158	Flad1	ENSMUSG00000042642	RFad1, flavin adenine dinucleotide synthetase, homolog (yeast)	459	0.31	1	14 +/- 10	17 +/- 12
scl50972.16.1_276	Mslnl	ENSMUSG00000041062	mesothelin-like	459	0.31	1	6 +/- 9	17 +/- 12
scl075630.1_80	AK006160	NA	NA	459	0.31	1	12 +/- 11	3 +/- 10
GI_38078905	Rap1gap	ENSMUSG00000041351	Rap1 GTPase-activating protein	459	0.31	1	10 +/- 10	14 +/- 11
scl097501.1_18	Elavl1	ENSMUSG00000040028	ELAV (embryonic lethal, abnormal vision)-like 1 (Hu antigen R)	459	0.31	1	10 +/- 11	1 +/- 10
scl0074838.1_14	Narg1	NA	NA	459	0.31	1	15 +/- 11	3 +/- 10
scl54886.5.1_22	Slitrk2	ENSMUSG00000036790	SLIT and NTRK-like family, member 2	459	0.31	1	5 +/- 9	22 +/- 12
scl000224.1_0	Sult2b1	ENSMUSG00000003271	sulfotransferase family, cytosolic, 2B, member 1	459	0.31	1	10 +/- 9	17 +/- 12
scl54819.15_251	Tbl1x	ENSMUSG00000025246	transducin (beta)-like 1 X-linked	459	0.31	1	9 +/- 11	2 +/- 10
scl070114.1_66	Prrg1	ENSMUSG00000047996	proline rich Gla (G-carboxyglutamic acid) 1	459	0.31	1	9 +/- 10	17 +/- 12
scl00231108.2_206	Plb1	ENSMUSG00000029134	phospholipase B1	459	0.31	1	7 +/- 9	19 +/- 12
ri|6330576B15|PX00315A12|AK032079|1927	Faah	ENSMUSG00000034171	fatty acid amide hydrolase	459	0.31	1	10 +/- 10	18 +/- 11
scl39908.21.1_34	Cpd	ENSMUSG00000020841	carboxypeptidase D	459	0.31	1	7 +/- 10	23 +/- 12
scl0002107.1_66	Scnm1	ENSMUSG00000092607	sodium channel modifier 1	459	0.31	1	12 +/- 11	18 +/- 11
scl53158.2_336	Tmem20	NA	NA	459	0.31	1	7 +/- 10	0 +/- 10
scl40589.5.1_6	1700020C11Rik	NA	NA	459	0.31	1	4 +/- 10	0 +/- 10
scl46617.10.1_4	Il3ra	ENSMUSG00000068758	interleukin 3 receptor, alpha chain	459	0.31	1	14 +/- 11	43 +/- 12
scl51810.1.734_119	AK031107	NA	NA	459	0.31	1	9 +/- 11	13 +/- 11
scl012331.2_166	Cap1	ENSMUSG00000028656	CAP, adenylate cyclase-associated protein 1 (yeast)	459	0.32	1	1 +/- 6	92 +/- 9
scl16010.9_219	Sft2d2	ENSMUSG00000040848	SFT2 domain containing 2	459	0.32	1	13 +/- 11	23 +/- 11
scl51558.7_199	AK087996	NA	NA	459	0.32	1	15 +/- 11	41 +/- 13
GI_38091627	Rps2	ENSMUSG00000044533	ribosomal protein S2	459	0.32	1	9 +/- 9	81 +/- 11
scl0026875.1_310	Pclo	ENSMUSG00000061601	piccolo (presynaptic cytomatrix protein)	459	0.32	1	3 +/- 10	16 +/- 10
scl16852.5.1_12	Mitd1	ENSMUSG00000026088	MIT, microtubule interacting and transport, domain containing 1	459	0.32	1	4 +/- 9	24 +/- 12
scl34564.9_192	Ccdc130	ENSMUSG00000004994	coiled-coil domain containing 130	459	0.32	1	7 +/- 10	24 +/- 12
scl067526.1_122	Atg12	ENSMUSG00000032905	autophagy related 12	459	0.32	1	14 +/- 11	3 +/- 9
scl33177.8_75	Tsnax	ENSMUSG00000056820	translin-associated factor X	459	0.32	1	3 +/- 10	11 +/- 10
scl0076890.1_191	Memo1	ENSMUSG00000058704	mediator of cell motility 1	459	0.32	1	15 +/- 11	14 +/- 11
scl011800.3_7	Api5	ENSMUSG00000027193	apoptosis inhibitor 5	459	0.32	1	18 +/- 12	7 +/- 10
scl26728.9.1_113	Rbks	ENSMUSG00000029136	ribokinase	459	0.32	1	5 +/- 9	16 +/- 12
scl41842.10.1_70	Upp1	ENSMUSG00000020407	uridine phosphorylase 1	459	0.32	1	4 +/- 9	20 +/- 12
scl41095.10.1_0	Tubd1	ENSMUSG00000020513	tubulin, delta 1	459	0.32	1	3 +/- 9	25 +/- 12
scl0001620.1_1	Stk19	ENSMUSG00000061207	serine/threonine kinase 19	459	0.32	1	11 +/- 11	8 +/- 11
ri|B930050L17|PX00163N08|AK047336|2334	AK047336	NA	NA	459	0.32	1	8 +/- 11	0 +/- 9
scl42746.1.1_82	AK040245	NA	NA	459	0.32	1	7 +/- 10	15 +/- 11
scl0071702.2_200	Cdc5l	ENSMUSG00000023932	cell division cycle 5-like (S. pombe)	459	0.32	1	5 +/- 10	1 +/- 9
scl0230709.2_6	Zmpste24	ENSMUSG00000043207	zinc metallopeptidase, STE24	459	0.32	1	7 +/- 10	15 +/- 11
scl00320011.1_153	Ugcgl1	NA	NA	459	0.32	1	7 +/- 10	19 +/- 11
scl51004.4_55	Sepx1	NA	NA	459	0.32	1	5 +/- 9	22 +/- 11
scl016779.32_71	Lamb2	ENSMUSG00000052911	laminin, beta 2	459	0.32	1	15 +/- 11	15 +/- 11
scl50168.8.1_112	Rhbdl1	ENSMUSG00000025735	rhomboid, veinlet-like 1 (Drosophila)	459	0.32	1	12 +/- 11	1 +/- 10
GI_20865503	EG237433	NA	NA	459	0.32	1	15 +/- 11	12 +/- 11
scl32452.10.1_47	Sh3gl3	ENSMUSG00000030638	SH3-domain GRB2-like 3	459	0.32	1	20 +/- 12	5 +/- 10
scl0004045.1_65	Dmtf1	ENSMUSG00000042508	cyclin D binding myb-like transcription factor 1	459	0.32	1	17 +/- 11	10 +/- 11
GI_38080112	AK007165	NA	NA	459	0.32	1	5 +/- 10	0 +/- 10
scl16317.12_198	Mapkapk2	ENSMUSG00000016528	MAP kinase-activated protein kinase 2	459	0.32	1	9 +/- 10	17 +/- 11
scl00320662.1_330	Casc1	ENSMUSG00000043541	cancer susceptibility candidate 1	459	0.32	1	9 +/- 10	15 +/- 11
scl32707.4.1_12	1700023D19Rik	NA	NA	459	0.32	1	11 +/- 10	15 +/- 12
ri|C230021J06|PX00174E09|AK048720|2150	Spats2	ENSMUSG00000051934	spermatogenesis associated, serine-rich 2	459	0.32	1	10 +/- 10	16 +/- 12
scl067605.5_228	Akt1s1	ENSMUSG00000011096	AKT1 substrate 1 (proline-rich)	459	0.32	1	15 +/- 11	6 +/- 10
scl33340.4_635	Txnl4b	ENSMUSG00000031723	thioredoxin-like 4B	459	0.32	1	9 +/- 10	6 +/- 11
scl0270118.1_279	BC032967	NA	NA	459	0.32	1	12 +/- 10	16 +/- 11
scl54492.8.1_0	Ap1s2	ENSMUSG00000031367	adaptor-related protein complex 1, sigma 2 subunit	459	0.32	1	15 +/- 11	12 +/- 11
scl33043.5.1_34	Gng8	ENSMUSG00000063594	guanine nucleotide binding protein (G protein), gamma 8	459	0.32	1	12 +/- 10	16 +/- 12
ri|4930449A18|PX00031H12|AK015427|2072	4930449A18Rik	ENSMUSG00000074589	RIKEN cDNA 4930449A18 gene	459	0.32	1	13 +/- 11	8 +/- 11
scl31502.9_323	Fxyd5	ENSMUSG00000009687	FXYD domain-containing ion transport regulator 5	459	0.32	1	13 +/- 10	13 +/- 11
scl29744.12_13	Tmem43	ENSMUSG00000030095	transmembrane protein 43	459	0.32	1	10 +/- 10	18 +/- 12
scl0001328.1_1	Fancl	ENSMUSG00000004018	Fanconi anemia, complementation group L	459	0.32	1	15 +/- 11	4 +/- 10
scl072330.2_29	Kbtbd5	NA	NA	459	0.32	1	11 +/- 11	4 +/- 10
scl46752.1.555_0	AK039901	NA	NA	459	0.32	1	8 +/- 9	17 +/- 12
scl00068.1_106	Inpp5f	ENSMUSG00000042105	inositol polyphosphate-5-phosphatase F	459	0.32	1	11 +/- 11	4 +/- 10
scl41904.3_0	Selm	ENSMUSG00000075702	selenoprotein M	459	0.32	1	10 +/- 10	13 +/- 11
scl0014567.2_90	Gdi1	ENSMUSG00000015291	guanosine diphosphate (GDP) dissociation inhibitor 1	459	0.32	1	14 +/- 11	13 +/- 11
ri|C630034H22|PX00085I01|AK049968|3575	Anapc7	ENSMUSG00000029466	anaphase promoting complex subunit 7	459	0.32	1	9 +/- 10	16 +/- 12
scl35598.8_175	Mapk6	ENSMUSG00000042688	mitogen-activated protein kinase 6	459	0.32	1	7 +/- 10	0 +/- 10
scl012700.3_170	Cish	ENSMUSG00000032578	cytokine inducible SH2-containing protein	459	0.32	1	9 +/- 10	15 +/- 12
scl0003901.1_33	Dip2a	ENSMUSG00000020231	DIP2 disco-interacting protein 2 homolog A (Drosophila)	459	0.32	1	11 +/- 10	13 +/- 11
scl0073447.1_127	Wdr13	ENSMUSG00000031166	WD repeat domain 13	459	0.32	1	12 +/- 10	16 +/- 12
scl28755.11.1_30	Dusp11	ENSMUSG00000030002	dual specificity phosphatase 11 (RNA/RNP complex 1-interacting)	459	0.32	1	6 +/- 10	0 +/- 9
ri|B230313B18|PX00159D13|AK080820|2358	Bcl10	ENSMUSG00000028191	B cell leukemia/lymphoma 10	459	0.32	1	13 +/- 10	14 +/- 11
scl0235534.2_16	Acpl2	NA	NA	459	0.32	1	10 +/- 10	7 +/- 11
scl18198.5_227	Samd10	ENSMUSG00000038605	sterile alpha motif domain containing 10	459	0.32	1	10 +/- 10	6 +/- 10
scl074132.1_5	Rnf6	ENSMUSG00000029634	ring finger protein (C3H2C3 type) 6	459	0.32	1	5 +/- 10	0 +/- 10
scl0258524.1_63	Olfr1168	ENSMUSG00000061342	olfactory receptor 1168	459	0.32	1	9 +/- 10	14 +/- 11
scl000974.1_4	Scyl3	ENSMUSG00000026584	SCY1-like 3 (S. cerevisiae)	459	0.32	1	7 +/- 10	1 +/- 10
scl0018845.2_170	Plxna2	ENSMUSG00000026640	plexin A2	459	0.32	1	6 +/- 11	0 +/- 9
ri|2610016D08|ZX00060H06|AK011411|1543	AK011411	NA	NA	459	0.32	1	8 +/- 11	3 +/- 10
scl53351.1.1_26	Olfr1420	ENSMUSG00000060878	olfactory receptor 1420	459	0.32	1	11 +/- 10	14 +/- 11
scl068385.4_14	Tlcd1	ENSMUSG00000019437	TLC domain containing 1	459	0.32	1	7 +/- 10	0 +/- 10
ri|9030206N17|PX00060L14|AK033447|2394	Tmc1	ENSMUSG00000024749	transmembrane channel-like gene family 1	459	0.32	1	4 +/- 10	0 +/- 10
scl41679.1_330	Atp10b	ENSMUSG00000055415	ATPase, class V, type 10B	459	0.32	1	8 +/- 11	0 +/- 9
scl51530.6.1_65	5133400G04Rik	NA	NA	459	0.32	1	4 +/- 10	3 +/- 9
ri|B930094H08|PX00167G09|AK081159|3077	A130090K04Rik	NA	NA	459	0.32	1	13 +/- 11	15 +/- 11
scl069072.8_1	Ebna1bp2	ENSMUSG00000028729	EBNA1 binding protein 2	459	0.32	1	15 +/- 12	11 +/- 11
scl41869.17_189	Dbnl	ENSMUSG00000020476	drebrin-like	459	0.32	1	14 +/- 11	39 +/- 12
scl28369.3.1_252	AK033854	NA	NA	459	0.32	1	19 +/- 12	9 +/- 10
scl0056357.2_122	Ivd	ENSMUSG00000027332	isovaleryl coenzyme A dehydrogenase	459	0.32	1	4 +/- 10	15 +/- 10
scl24398.4.1_27	Hint2	ENSMUSG00000028470	histidine triad nucleotide binding protein 2	459	0.32	1	3 +/- 10	20 +/- 10
scl24262.3_152	Hdhd3	ENSMUSG00000038422	haloacid dehalogenase-like hydrolase domain containing 3	459	0.33	1	9 +/- 9	68 +/- 10
scl16192.1_581	Trove2	ENSMUSG00000018199	TROVE domain family, member 2	459	0.33	1	11 +/- 11	32 +/- 12
scl29844.3_633	1700003E16Rik	ENSMUSG00000030030	RIKEN cDNA 1700003E16 gene	459	0.33	1	13 +/- 11	24 +/- 12
scl022631.1_10	Ywhaz	ENSMUSG00000022285	tyrosine 3-monooxygenase/tryptophan 5-monooxygenase activation protein, zeta polypeptide	459	0.33	1	3 +/- 9	36 +/- 12
scl0018111.2_84	Nnat	ENSMUSG00000067786	neuronatin	459	0.33	1	13 +/- 11	25 +/- 12
scl41379.14.1_107	Aloxe3	ENSMUSG00000020892	arachidonate lipoxygenase 3	459	0.33	1	3 +/- 9	29 +/- 13
scl52271.2_211	AK079887	NA	NA	459	0.33	1	13 +/- 11	21 +/- 11
scl48382.9_267	Tfg	ENSMUSG00000022757	Trk-fused gene	459	0.33	1	4 +/- 10	4 +/- 10
scl16080.8.1_118	mKIAA1747	NA	NA	459	0.33	1	4 +/- 10	7 +/- 10
scl25330.1.1_0	AK008061	NA	NA	459	0.33	1	4 +/- 10	4 +/- 10
scl0012234.2_2	Btrc	ENSMUSG00000025217	beta-transducin repeat containing protein	459	0.33	1	5 +/- 9	21 +/- 12
ri|8430411H10|PX00024N10|AK018404|783	4930429M06Rik	NA	NA	459	0.33	1	10 +/- 10	6 +/- 10
scl0020788.1_174	Srebf2	ENSMUSG00000022463	sterol regulatory element binding factor 2	459	0.33	1	10 +/- 10	28 +/- 12
scl014081.20_10	Acsl1	ENSMUSG00000018796	acyl-CoA synthetase long-chain family member 1	459	0.33	1	7 +/- 10	27 +/- 12
scl00223455.2_26	2006-03-01	NA	NA	459	0.33	1	18 +/- 12	7 +/- 10
scl26543.18.7_43	BC013481	NA	NA	459	0.33	1	12 +/- 11	10 +/- 10
scl0236539.2_17	Phgdh	ENSMUSG00000053398	3-phosphoglycerate dehydrogenase	459	0.33	1	10 +/- 10	18 +/- 11
GI_38079738	Acap2	ENSMUSG00000049076	ArfGAP with coiled-coil, ankyrin repeat and PH domains 2	459	0.33	1	9 +/- 11	3 +/- 10
scl056264.2_29	Fam113a	NA	NA	459	0.33	1	5 +/- 10	1 +/- 9
scl0003814.1_106	Ddo	ENSMUSG00000063428	D-aspartate oxidase	459	0.33	1	8 +/- 9	18 +/- 12
scl40358.24.1_14	Wwc1	ENSMUSG00000018849	WW, C2 and coiled-coil domain containing 1	459	0.33	1	5 +/- 9	14 +/- 11
scl00192651.2_97	Zfp286	ENSMUSG00000047342	zinc finger protein 286	459	0.33	1	8 +/- 10	16 +/- 11
scl27996.10.1_104	Rnf32	ENSMUSG00000029130	ring finger protein 32	459	0.33	1	5 +/- 9	14 +/- 11
scl00320343.2_63	Lypd6	ENSMUSG00000050447	LY6/PLAUR domain containing 6	459	0.33	1	14 +/- 11	14 +/- 11
ri|E130112N23|PX00091P17|AK053596|1823	AK053596	NA	NA	459	0.33	1	4 +/- 10	10 +/- 10
scl028062.4_5	Txnl4a	ENSMUSG00000057130	thioredoxin-like 4A	459	0.33	1	9 +/- 10	19 +/- 12
scl28398.3.1_50	Ntf3	ENSMUSG00000049107	neurotrophin 3	459	0.33	1	17 +/- 11	9 +/- 11
scl43457.5.1_29	Mrps30	ENSMUSG00000021731	mitochondrial ribosomal protein S30	459	0.33	1	7 +/- 11	4 +/- 10
scl014168.2_27	Fgf13	ENSMUSG00000031137	fibroblast growth factor 13	459	0.33	1	13 +/- 10	15 +/- 12
scl0070686.2_11	Dusp16	ENSMUSG00000030203	dual specificity phosphatase 16	459	0.33	1	5 +/- 9	19 +/- 12
scl0381590.1_8	C87499	ENSMUSG00000038330	expressed sequence C87499	459	0.33	1	13 +/- 11	12 +/- 11
scl20175.1.1_43	Insm1	ENSMUSG00000068154	insulinoma-associated 1	459	0.33	1	5 +/- 9	14 +/- 11
GI_46402292	AK052388	NA	NA	459	0.33	1	14 +/- 11	16 +/- 12
scl46492.14_472	Bap1	ENSMUSG00000021901	Brca1 associated protein 1	459	0.33	1	10 +/- 11	3 +/- 10
scl0069440.1_122	1700027J05Rik	NA	NA	459	0.33	1	13 +/- 11	1 +/- 9
scl53113.11_103	4933417O08Rik	NA	NA	459	0.33	1	9 +/- 11	3 +/- 10
ri|C820009D21|PX00088B03|AK050526|963	Rab1A	NA	NA	459	0.33	1	4 +/- 9	17 +/- 12
scl0002526.1_32	Wdr67	NA	NA	459	0.33	1	12 +/- 10	14 +/- 11
scl17680.1.1_194	AK017720	NA	NA	459	0.33	1	13 +/- 11	9 +/- 11
scl000154.1_82	Bccip	ENSMUSG00000030983	BRCA2 and CDKN1A interacting protein	459	0.33	1	11 +/- 11	6 +/- 10
scl53863.5.1_114	Zfp711	ENSMUSG00000025529	zinc finger protein 711	459	0.33	1	5 +/- 9	15 +/- 11
scl0069116.1_159	Zubr1	NA	NA	459	0.33	1	13 +/- 11	10 +/- 11
scl00245616.2_11	Kir3dl1	ENSMUSG00000031424	killer cell immunoglobulin-like receptor, three domains, long cytoplasmic tail, 1	459	0.33	1	8 +/- 10	3 +/- 10
scl013043.14_0	Cttn	ENSMUSG00000031078	cortactin	459	0.33	1	9 +/- 10	15 +/- 11
scl48876.7.1_7	Ifngr2	ENSMUSG00000022965	interferon gamma receptor 2	459	0.33	1	9 +/- 11	2 +/- 10
GI_38090723	Cpsf6	ENSMUSG00000055531	cleavage and polyadenylation specific factor 6	459	0.33	1	5 +/- 9	16 +/- 12
scl012321.6_3	Calu	ENSMUSG00000029767	calumenin	459	0.33	1	12 +/- 11	4 +/- 10
scl50812.4.1_9	Prrt1	ENSMUSG00000015476	proline-rich transmembrane protein 1	459	0.33	1	10 +/- 11	4 +/- 10
GI_38076110	Nat12	NA	NA	459	0.33	1	8 +/- 9	16 +/- 12
scl21835.21.1_1	Setdb1	ENSMUSG00000015697	SET domain, bifurcated 1	459	0.33	1	12 +/- 10	10 +/- 11
scl0072993.2_232	Appl1	ENSMUSG00000040760	adaptor protein, phosphotyrosine interaction, PH domain and leucine zipper containing 1	459	0.33	1	16 +/- 12	12 +/- 11
scl0077945.1_177	Rpgrip1	ENSMUSG00000057132	retinitis pigmentosa GTPase regulator interacting protein 1	459	0.33	1	17 +/- 12	16 +/- 11
scl000798.1_9	Rgs1	ENSMUSG00000026358	regulator of G-protein signaling 1	459	0.33	1	8 +/- 9	16 +/- 12
scl0075717.2_246	Cul5	ENSMUSG00000032030	cullin 5	459	0.33	1	7 +/- 9	15 +/- 12
GI_38074864	Plp2	ENSMUSG00000031146	proteolipid protein 2	459	0.33	1	6 +/- 10	1 +/- 10
scl32925.7_312	Atp5sl	ENSMUSG00000057229	ATP5S-like	459	0.33	1	6 +/- 10	0 +/- 9
scl39709.20.1_44	Mycbpap	ENSMUSG00000039110	MYCBP associated protein	459	0.33	1	8 +/- 10	16 +/- 11
scl0003784.1_7	Krr1	ENSMUSG00000063334	KRR1, small subunit (SSU) processome component, homolog (yeast)	459	0.33	1	11 +/- 10	11 +/- 11
scl0003066.1_247	Tmem127	ENSMUSG00000034850	transmembrane protein 127	459	0.33	1	13 +/- 11	13 +/- 11
scl018693.12_2	Pick1	ENSMUSG00000068206	protein interacting with C kinase 1	459	0.33	1	5 +/- 9	17 +/- 12
scl54144.14_12	Irak1	ENSMUSG00000031392	interleukin-1 receptor-associated kinase 1	459	0.33	1	16 +/- 12	11 +/- 11
scl38357.2.167_180	Ppm1h	ENSMUSG00000034613	protein phosphatase 1H (PP2C domain containing)	459	0.33	1	6 +/- 10	0 +/- 9
scl0001229.1_5	Camk1	ENSMUSG00000030272	calcium/calmodulin-dependent protein kinase I	459	0.33	1	8 +/- 10	17 +/- 12
scl51406.12.1_24	mKIAA1281	NA	NA	459	0.33	1	6 +/- 10	0 +/- 10
scl0003591.1_99	Keap1	ENSMUSG00000003308	kelch-like ECH-associated protein 1	459	0.33	1	7 +/- 11	0 +/- 9
ri|2810406C12|ZX00034P03|AK013008|953	Csnk2a2	ENSMUSG00000046707	casein kinase 2, alpha prime polypeptide	459	0.33	1	4 +/- 10	2 +/- 10
scl36461.1_269	AK217499	NA	NA	459	0.33	1	7 +/- 10	0 +/- 10
GI_38089967	Phip	ENSMUSG00000032253	pleckstrin homology domain interacting protein	459	0.33	1	9 +/- 10	15 +/- 11
scl26655.5_57	Hs3st1	ENSMUSG00000051022	heparan sulfate (glucosamine) 3-O-sulfotransferase 1	459	0.33	1	4 +/- 9	19 +/- 12
scl0021766.1_289	Tex261	ENSMUSG00000014748	testis expressed gene 261	459	0.33	1	3 +/- 10	7 +/- 10
ri|D730049G17|PX00091O17|AK021356|866	St6galnac3	ENSMUSG00000052544	ST6 (alpha-N-acetyl-neuraminyl-2,3-beta-galactosyl-1,3)-N-acetylgalactosaminide alpha-2,6-sialyltransferase 3	459	0.33	1	8 +/- 11	7 +/- 10
scl0068585.2_67	Rtn4	ENSMUSG00000020458	reticulon 4	459	0.33	1	2 +/- 8	64 +/- 12
scl45683.9_474	5730469M10Rik	NA	NA	459	0.34	1	2 +/- 8	54 +/- 12
scl069367.4_58	Glrx2	ENSMUSG00000018196	glutaredoxin 2 (thioltransferase)	459	0.34	1	2 +/- 8	59 +/- 12
scl53305.8.1_17	BC016495	NA	NA	459	0.34	1	10 +/- 10	52 +/- 11
scl15001.1.1_140	AK171952	NA	NA	459	0.34	1	10 +/- 11	18 +/- 11
scl45359.10.52_9	Pdlim2	ENSMUSG00000022090	PDZ and LIM domain 2	459	0.34	1	3 +/- 9	42 +/- 12
scl075541.1_190	1700019G17Rik	ENSMUSG00000068299	RIKEN cDNA 1700019G17 gene	459	0.34	1	3 +/- 9	25 +/- 10
scl0217733.21_10	Tmem63c	ENSMUSG00000034145	transmembrane protein 63c	459	0.34	1	13 +/- 11	12 +/- 11
scl38735.7_162	Pttg1ip	ENSMUSG00000009291	pituitary tumor-transforming 1 interacting protein	459	0.34	1	3 +/- 9	25 +/- 12
scl46038.17.1_26	Tdrd3	ENSMUSG00000022019	tudor domain containing 3	459	0.34	1	13 +/- 11	38 +/- 13
scl000768.1_18	Mff	ENSMUSG00000026150	mitochondrial fission factor	459	0.34	1	5 +/- 9	17 +/- 11
scl0023802.2_62	Amfr	ENSMUSG00000031751	autocrine motility factor receptor	459	0.34	1	13 +/- 11	12 +/- 11
scl00381629.1_255	0610007C21Rik	NA	NA	459	0.34	1	8 +/- 11	7 +/- 10
scl017527.1_149	Mpv17	ENSMUSG00000107283	MpV17 mitochondrial inner membrane protein	459	0.34	1	14 +/- 11	6 +/- 10
scl26834.2.1_169	AK013579	NA	NA	459	0.34	1	19 +/- 12	21 +/- 12
scl0013211.2_49	Dhx9	ENSMUSG00000042699	DEAH (Asp-Glu-Ala-His) box polypeptide 9	459	0.34	1	11 +/- 11	14 +/- 11
scl43155.10.40_7	Klhdc2	ENSMUSG00000020978	kelch domain containing 2	459	0.34	1	3 +/- 9	20 +/- 10
scl21819.1_4	AK090257	NA	NA	459	0.34	1	12 +/- 10	9 +/- 11
scl0013885.1_42	Esd	ENSMUSG00000021996	esterase D/formylglutathione hydrolase	459	0.34	1	6 +/- 9	22 +/- 12
scl0021969.2_45	Top1	ENSMUSG00000070544	topoisomerase (DNA) I	459	0.34	1	15 +/- 11	12 +/- 11
ri|A130096D14|PX00126C11|AK038333|1411	AK038333	NA	NA	459	0.34	1	9 +/- 10	28 +/- 12
scl012464.14_38	Cct4	ENSMUSG00000007739	chaperonin containing Tcp1, subunit 4 (delta)	459	0.34	1	4 +/- 9	24 +/- 12
GI_38090712	Bbs10	ENSMUSG00000035759	Bardet-Biedl syndrome 10 (human)	459	0.34	1	12 +/- 11	5 +/- 10
GI_38076307	Lrrc16b	ENSMUSG00000022211	leucine rich repeat containing 16B	459	0.34	1	13 +/- 10	16 +/- 12
GI_18079338	Aco2	ENSMUSG00000022477	aconitase 2, mitochondrial	459	0.34	1	10 +/- 10	16 +/- 11
scl31390.16.1_7	Aldh16a1	ENSMUSG00000007833	aldehyde dehydrogenase 16 family, member A1	459	0.34	1	14 +/- 11	11 +/- 10
scl0021416.1_5	Tcf4	ENSMUSG00000053477	transcription factor 4	459	0.34	1	4 +/- 9	19 +/- 12
GI_46877053	Fbxo3	ENSMUSG00000027180	F-box protein 3	459	0.34	1	8 +/- 10	21 +/- 12
scl0258875.1_58	Olfr895	ENSMUSG00000096427	olfactory receptor 895	459	0.34	1	5 +/- 9	15 +/- 12
scl0000102.1_16	Atp5j	ENSMUSG00000022890	ATP synthase, H+ transporting, mitochondrial F0 complex, subunit F	459	0.34	1	7 +/- 10	0 +/- 9
scl067067.1_49	2010100O12Rik	NA	NA	459	0.34	1	4 +/- 9	18 +/- 12
scl011898.16_99	Ass1	ENSMUSG00000076441	argininosuccinate synthetase 1	459	0.34	1	10 +/- 11	4 +/- 10
scl26171.10_196		ENSMUSG00000106534	NA	459	0.34	1	6 +/- 10	3 +/- 10
scl48516.2.1_28	AK005497	NA	NA	459	0.34	1	14 +/- 11	5 +/- 10
scl0001923.1_57	2410004B18Rik	ENSMUSG00000036873	RIKEN cDNA 2410004B18 gene	459	0.34	1	10 +/- 10	6 +/- 11
scl0002175.1_5	Fech	ENSMUSG00000024588	ferrochelatase	459	0.34	1	11 +/- 11	5 +/- 10
scl0004128.1_433	Wipi2	ENSMUSG00000029578	WD repeat domain, phosphoinositide interacting 2	459	0.34	1	6 +/- 9	19 +/- 12
scl40719.31.1_148	Llgl2	ENSMUSG00000020782	lethal giant larvae homolog 2 (Drosophila)	459	0.34	1	4 +/- 9	17 +/- 12
scl0054219.2_27	Cd320	ENSMUSG00000002308	CD320 antigen	459	0.34	1	14 +/- 11	12 +/- 11
scl011735.19_2	Ank3	ENSMUSG00000069601	ankyrin 3, epithelial	459	0.34	1	14 +/- 12	11 +/- 10
scl45540.5.1_3	Fam158a	NA	NA	459	0.34	1	10 +/- 10	13 +/- 11
scl0026931.1_100	Ppp2r5c	ENSMUSG00000017843	protein phosphatase 2, regulatory subunit B', gamma	459	0.34	1	15 +/- 11	12 +/- 11
scl9636.1.1_309	Zfp84	ENSMUSG00000046185	zinc finger protein 84	459	0.34	1	21 +/- 12	16 +/- 11
scl35347.1.1_116	AK033243	NA	NA	459	0.34	1	6 +/- 9	18 +/- 12
scl0002680.1_6	Ybx1	ENSMUSG00000028639	Y box protein 1	459	0.34	1	8 +/- 10	20 +/- 12
scl026889.3_52	Cln8	ENSMUSG00000026317	ceroid-lipofuscinosis, neuronal 8	459	0.34	1	12 +/- 10	12 +/- 11
scl0227648.1_142	Sec16a	ENSMUSG00000026924	SEC16 homolog A (S. cerevisiae)	459	0.34	1	15 +/- 11	13 +/- 11
scl00110593.1_306	Prdm2	ENSMUSG00000057637	PR domain containing 2, with ZNF domain	459	0.34	1	10 +/- 10	16 +/- 12
scl0052705.2_7	Krr1	ENSMUSG00000063334	KRR1, small subunit (SSU) processome component, homolog (yeast)	459	0.34	1	13 +/- 11	15 +/- 11
scl0072108.1_60	Ddhd2	ENSMUSG00000061313	DDHD domain containing 2	459	0.34	1	13 +/- 10	21 +/- 12
scl35528.21.6_0	mKIAA0656	NA	NA	459	0.34	1	12 +/- 10	15 +/- 11
scl0012831.1_231	Col5a1	ENSMUSG00000026837	collagen, type V, alpha 1	459	0.34	1	8 +/- 9	17 +/- 12
GI_21704129	AK133808	NA	NA	459	0.34	1	9 +/- 10	2 +/- 10
scl0004046.1_197	Tbx5	ENSMUSG00000018263	T-box 5	459	0.34	1	10 +/- 10	12 +/- 11
scl33119.1.1_6	4632433K11Rik	ENSMUSG00000063757	RIKEN cDNA 4632433K11 gene	459	0.34	1	13 +/- 11	15 +/- 11
scl0226610.2_309	C030014K22Rik	NA	NA	459	0.34	1	7 +/- 9	16 +/- 12
ri|4933428G20|PX00021D13|AK016967|1425	4933428G20Rik	ENSMUSG00000047988	RIKEN cDNA 4933428G20 gene	459	0.34	1	5 +/- 9	16 +/- 12
scl52341.26.1_27	Afap1l2	ENSMUSG00000025083	actin filament associated protein 1-like 2	459	0.34	1	6 +/- 10	14 +/- 11
scl0001644.1_2	Mapk14	ENSMUSG00000053436	mitogen-activated protein kinase 14	459	0.34	1	12 +/- 10	9 +/- 11
scl0002197.1_1632	Camk2a	ENSMUSG00000024617	calcium/calmodulin-dependent protein kinase II alpha	459	0.34	1	8 +/- 10	17 +/- 12
scl49768.3_29	Ticam1	ENSMUSG00000047123	toll-like receptor adaptor molecule 1	459	0.34	1	11 +/- 11	7 +/- 11
scl25766.4.1_97	Cdx2	ENSMUSG00000029646	caudal type homeobox 2	459	0.34	1	11 +/- 10	13 +/- 11
scl18196.2_265	Sox18	ENSMUSG00000046470	SRY (sex determining region Y)-box 18	459	0.34	1	11 +/- 10	15 +/- 11
scl00217692.2_267	Sipa1l1	ENSMUSG00000042700	signal-induced proliferation-associated 1 like 1	459	0.34	1	9 +/- 11	0 +/- 9
scl7256.1.1_87	Mycs	ENSMUSG00000044597	myc-like oncogene, s-myc protein	459	0.34	1	10 +/- 10	13 +/- 11
scl20056.4.1_63	Map1lc3a	ENSMUSG00000027602	microtubule-associated protein 1 light chain 3 alpha	459	0.34	1	9 +/- 10	16 +/- 11
scl42456.11_22	Baz1a	ENSMUSG00000035021	bromodomain adjacent to zinc finger domain 1A	459	0.34	1	15 +/- 11	13 +/- 11
scl000506.1_4	Mgea5	ENSMUSG00000025220	meningioma expressed antigen 5 (hyaluronidase)	459	0.34	1	8 +/- 11	0 +/- 10
scl00216971.1_119	BC017647	NA	NA	459	0.34	1	4 +/- 10	1 +/- 10
ri|E330023A07|PX00212F01|AK054406|2107	Camk2g	ENSMUSG00000021820	calcium/calmodulin-dependent protein kinase II gamma	459	0.34	1	5 +/- 10	0 +/- 10
scl49287.19_426	Lpp	ENSMUSG00000033306	LIM domain containing preferred translocation partner in lipoma	459	0.34	1	4 +/- 9	20 +/- 12
scl000980.1_16	Mcm6	ENSMUSG00000026355	minichromosome maintenance deficient 6 (MIS5 homolog, S. pombe) (S. cerevisiae)	459	0.34	1	13 +/- 11	17 +/- 11
scl19176.21_114	Stk39	ENSMUSG00000027030	serine/threonine kinase 39	459	0.34	1	6 +/- 9	15 +/- 11
scl0019735.2_283	Rgs2	ENSMUSG00000026360	regulator of G-protein signaling 2	459	0.34	1	18 +/- 12	10 +/- 10
scl0003222.1_23	Dgkz	ENSMUSG00000040479	diacylglycerol kinase zeta	459	0.34	1	11 +/- 10	10 +/- 11
scl50113.16.1_150	Srpk1	ENSMUSG00000004865	serine/arginine-rich protein specific kinase 1	459	0.34	1	13 +/- 11	6 +/- 10
scl0001708.1_442	Qk	ENSMUSG00000062078	quaking	459	0.34	1	11 +/- 11	1 +/- 9
scl0014897.1_159	Trip12	ENSMUSG00000026219	thyroid hormone receptor interactor 12	459	0.34	1	5 +/- 10	0 +/- 10
ri|A430091O22|PX00138D01|AK040404|2896	Raver2	ENSMUSG00000035275	ribonucleoprotein, PTB-binding 2	459	0.34	1	3 +/- 10	1 +/- 10
scl0226829.2_26	Ptpn14	ENSMUSG00000026604	protein tyrosine phosphatase, non-receptor type 14	459	0.34	1	4 +/- 10	0 +/- 10
scl31152.21.1_30	Polg	ENSMUSG00000039176	polymerase (DNA directed), gamma	459	0.34	1	6 +/- 10	0 +/- 10
scl16973.17.1_29	Stau2	ENSMUSG00000025920	staufen (RNA binding protein) homolog 2 (Drosophila)	459	0.34	1	6 +/- 10	37 +/- 12
GI_20886018	Setd6	ENSMUSG00000031671	SET domain containing 6	459	0.34	1	11 +/- 11	2 +/- 9
scl0022350.2_262	Ezr	ENSMUSG00000052397	ezrin	459	0.34	1	17 +/- 12	16 +/- 11
scl020818.5_51	Srprb	ENSMUSG00000032553	signal recognition particle receptor, B subunit	459	0.34	1	12 +/- 11	16 +/- 11
scl40326.1.1_146	AK020669	NA	NA	459	0.34	1	1 +/- 7	78 +/- 11
ri|C130032J12|PX00168C23|AK048061|2846	Mapk1ip1l	ENSMUSG00000021840	mitogen-activated protein kinase 1 interacting protein 1-like	459	0.34	1	16 +/- 12	12 +/- 11
scl28224.2_30	Sox5	ENSMUSG00000041540	SRY (sex determining region Y)-box 5	459	0.34	1	13 +/- 11	20 +/- 12
GI_38074999	D430041D05Rik	ENSMUSG00000068373	RIKEN cDNA D430041D05 gene	459	0.34	1	2 +/- 9	40 +/- 12
scl073196.2_279	Rhobtb1	ENSMUSG00000019944	Rho-related BTB domain containing 1	459	0.34	1	6 +/- 11	0 +/- 9
scl0002098.1_2	Sars	ENSMUSG00000068739	seryl-aminoacyl-tRNA synthetase	459	0.34	1	9 +/- 10	16 +/- 10
scl0109309.1_15	9130404D08Rik	NA	NA	459	0.34	1	3 +/- 9	23 +/- 12
scl42611.4_130	Trib2	ENSMUSG00000020601	tribbles homolog 2 (Drosophila)	459	0.34	1	3 +/- 10	5 +/- 10
scl0066460.1_267	Sys1	ENSMUSG00000045503	SYS1 Golgi-localized integral membrane protein homolog (S. cerevisiae)	459	0.34	1	4 +/- 10	18 +/- 10
scl52152.26_586	Wdr33	ENSMUSG00000024400	WD repeat domain 33	459	0.35	1	11 +/- 10	52 +/- 11
scl00218294.2_195	Cdc14b	ENSMUSG00000033102	CDC14 cell division cycle 14B	459	0.35	1	7 +/- 9	62 +/- 11
scl0002902.1_39	Atp6ap2	ENSMUSG00000031007	ATPase, H+ transporting, lysosomal accessory protein 2	459	0.35	1	6 +/- 10	23 +/- 12
scl30272.17_189	Nrf1	ENSMUSG00000058440	nuclear respiratory factor 1	459	0.35	1	4 +/- 9	28 +/- 12
scl49347.8_340	Klhl24	ENSMUSG00000062901	kelch-like 24	459	0.35	1	15 +/- 12	15 +/- 11
scl37252.14.1_245	Zfp317	ENSMUSG00000057551	zinc finger protein 317	459	0.35	1	14 +/- 11	20 +/- 12
scl012153.1_23	Bmp1	ENSMUSG00000022098	bone morphogenetic protein 1	459	0.35	1	4 +/- 9	20 +/- 11
scl0258241.1_220	Olfr1212	ENSMUSG00000048226	olfactory receptor 1212	459	0.35	1	12 +/- 11	7 +/- 10
scl067549.1_82	Gpr89	ENSMUSG00000028096	G protein-coupled receptor 89	459	0.35	1	3 +/- 9	18 +/- 11
scl18579.23.1_24	Rrbp1	ENSMUSG00000027422	ribosome binding protein 1	459	0.35	1	14 +/- 11	18 +/- 11
scl34530.10_50	Neto2	ENSMUSG00000036902	neuropilin (NRP) and tolloid (TLL)-like 2	459	0.35	1	15 +/- 12	15 +/- 11
scl21701.9.1_3	Atp5f1	ENSMUSG00000000563	ATP synthase, H+ transporting, mitochondrial F0 complex, subunit B1	459	0.35	1	4 +/- 9	18 +/- 11
scl013063.3_11	Cycs	ENSMUSG00000063694	cytochrome c, somatic	459	0.35	1	10 +/- 10	20 +/- 12
ri|A930001D11|PX00065I03|AK044207|4437	AK044207	NA	NA	459	0.35	1	11 +/- 11	18 +/- 11
ri|4833438J18|PX00638B20|AK076521|1966	Fbxo21	ENSMUSG00000032898	F-box protein 21	459	0.35	1	13 +/- 11	9 +/- 11
scl0070478.2_80	Mipep	ENSMUSG00000021993	mitochondrial intermediate peptidase	459	0.35	1	4 +/- 9	17 +/- 12
scl21089.8_496	Dolpp1	ENSMUSG00000026856	dolichyl pyrophosphate phosphatase 1	459	0.35	1	11 +/- 11	8 +/- 11
ri|3300002N10|ZX00035N20|AK014376|2067	Caskin1	ENSMUSG00000033597	CASK interacting protein 1	459	0.35	1	6 +/- 10	1 +/- 10
scl011844.1_12	Arf5	ENSMUSG00000020440	ADP-ribosylation factor 5	459	0.35	1	6 +/- 9	25 +/- 12
scl51511.5_328	Hbegf	ENSMUSG00000024486	heparin-binding EGF-like growth factor	459	0.35	1	5 +/- 9	17 +/- 12
scl16544.13_20	Sphkap	ENSMUSG00000026163	SPHK1 interactor, AKAP domain containing	459	0.35	1	11 +/- 10	22 +/- 12
scl00116940.1_172	Tgs1	ENSMUSG00000028233	trimethylguanosine synthase homolog (S. cerevisiae)	459	0.35	1	13 +/- 11	9 +/- 11
scl00226351.2_117	Tmem185b	ENSMUSG00000098923	transmembrane protein 185B	459	0.35	1	5 +/- 10	0 +/- 9
scl0003806.1_19	Hddc2	ENSMUSG00000000295	HD domain containing 2	459	0.35	1	8 +/- 11	0 +/- 9
scl28596.5_108	Rybp	ENSMUSG00000072872	RING1 and YY1 binding protein	459	0.35	1	11 +/- 11	3 +/- 10
GI_38084791	Gm960	ENSMUSG00000071691	predicted gene 960	459	0.35	1	7 +/- 9	26 +/- 12
scl10895.1.1_41	AK018107	NA	NA	459	0.35	1	15 +/- 11	9 +/- 11
scl32477.13_570	Prc1	ENSMUSG00000038943	protein regulator of cytokinesis 1	459	0.35	1	12 +/- 10	13 +/- 11
scl066366.11_67	Ergic3	ENSMUSG00000005881	ERGIC and golgi 3	459	0.35	1	13 +/- 11	7 +/- 10
scl026374.8_4	Rfwd2	ENSMUSG00000040782	ring finger and WD repeat domain 2	459	0.35	1	13 +/- 11	14 +/- 11
ri|6720422K01|PX00059I12|AK032734|1961	AK032734	NA	NA	459	0.35	1	7 +/- 10	0 +/- 10
scl20223.6.1_258	AK077398	NA	NA	459	0.35	1	7 +/- 9	21 +/- 12
scl0001373.1_2	Sumo2	ENSMUSG00000020738	small ubiquitin-like modifier 2	459	0.35	1	5 +/- 10	1 +/- 10
scl41202.6.1_16	Slc46a1	ENSMUSG00000020829	solute carrier family 46, member 1	459	0.35	1	5 +/- 10	0 +/- 10
ri|B230309H04|PX00159M19|AK045750|3043	Dock9	ENSMUSG00000025558	dedicator of cytokinesis 9	459	0.35	1	10 +/- 10	18 +/- 12
scl41232.2.1_8	2210008F06Rik	ENSMUSG00000097165	RIKEN cDNA 2210008F06 gene	459	0.35	1	5 +/- 10	0 +/- 10
scl54485.6_175	Piga	ENSMUSG00000031381	phosphatidylinositol glycan anchor biosynthesis, class A	459	0.35	1	13 +/- 11	7 +/- 11
scl48517.26.1_0	Pdia5	ENSMUSG00000022844	protein disulfide isomerase associated 5	459	0.35	1	5 +/- 10	0 +/- 9
scl8912.1.1_248	AK053951	NA	NA	459	0.35	1	5 +/- 9	19 +/- 12
scl33659.17.1_21	Mcm5	ENSMUSG00000005410	minichromosome maintenance deficient 5, cell division cycle 46 (S. cerevisiae)	459	0.35	1	3 +/- 10	6 +/- 10
scl39638.4.1_92	Rpl23	ENSMUSG00000071415	ribosomal protein L23	459	0.35	1	10 +/- 11	1 +/- 10
scl27363.2_20	Triap1	ENSMUSG00000029535	TP53 regulated inhibitor of apoptosis 1	459	0.35	1	11 +/- 11	3 +/- 10
ri|1100001M03|ZA00008A13|AK075617|1643	Prmt6	ENSMUSG00000049300	protein arginine N-methyltransferase 6	459	0.35	1	10 +/- 10	12 +/- 11
scl9889.1.1_2	AK003962	NA	NA	459	0.35	1	5 +/- 9	16 +/- 12
scl0003808.1_9	Ilvbl	ENSMUSG00000032763	ilvB (bacterial acetolactate synthase)-like	459	0.35	1	9 +/- 11	2 +/- 10
scl0077041.2_320	Arsk	ENSMUSG00000021592	arylsulfatase K	459	0.35	1	8 +/- 9	14 +/- 11
scl000019.1_459	Ubqln2	ENSMUSG00000050148	ubiquilin 2	459	0.35	1	7 +/- 9	17 +/- 12
scl22815.8.159_29	Trim45	ENSMUSG00000033233	tripartite motif-containing 45	459	0.35	1	8 +/- 9	13 +/- 11
scl24617.16.29_1	Cdc2l1	NA	NA	459	0.35	1	13 +/- 10	12 +/- 11
scl073392.2_72	AK006816	NA	NA	459	0.35	1	12 +/- 11	5 +/- 10
scl0003699.1_33	Elmo1	ENSMUSG00000041112	engulfment and cell motility 1	459	0.35	1	8 +/- 10	16 +/- 12
scl0002924.1_11	Psmd10	ENSMUSG00000031429	proteasome (prosome, macropain) 26S subunit, non-ATPase, 10	459	0.35	1	11 +/- 10	15 +/- 11
scl0002294.1_29	Tssc1	ENSMUSG00000036613	tumor suppressing subtransferable candidate 1	459	0.35	1	13 +/- 11	10 +/- 11
scl0001034.1_561	Crbn	ENSMUSG00000005362	cereblon	459	0.35	1	6 +/- 10	0 +/- 10
scl24756.9.1_15	Mfap2	ENSMUSG00000060572	microfibrillar-associated protein 2	459	0.35	1	10 +/- 10	12 +/- 11
GI_31980906	2700062C07Rik	ENSMUSG00000024273	RIKEN cDNA 2700062C07 gene	459	0.35	1	7 +/- 10	1 +/- 10
scl37111.7.1_0	Vsig2	ENSMUSG00000001943	V-set and immunoglobulin domain containing 2	459	0.35	1	9 +/- 10	3 +/- 10
scl23934.7.25_111	Dmap1	ENSMUSG00000009640	DNA methyltransferase 1-associated protein 1	459	0.35	1	9 +/- 11	2 +/- 10
scl40800.1.2337_80	AK054146	NA	NA	459	0.35	1	5 +/- 10	0 +/- 10
scl0074498.2_136	Gorasp1	ENSMUSG00000032513	golgi reassembly stacking protein 1	459	0.35	1	6 +/- 10	0 +/- 10
scl25041.1.49_5	Elovl1	ENSMUSG00000006390	elongation of very long chain fatty acids (FEN1/Elo2, SUR4/Elo3, yeast)-like 1	459	0.35	1	15 +/- 11	15 +/- 11
scl43278.2_224	Sostdc1	ENSMUSG00000036169	sclerostin domain containing 1	459	0.35	1	6 +/- 9	19 +/- 12
scl0001050.1_29	Emg1	ENSMUSG00000004268	EMG1 nucleolar protein homolog (S. cerevisiae)	459	0.35	1	10 +/- 11	6 +/- 10
ri|3830408G03|PX00093C15|AK028353|1497	2006-03-01	NA	NA	459	0.35	1	7 +/- 10	0 +/- 10
scl27732.1_2	Gabrb1	ENSMUSG00000029212	gamma-aminobutyric acid (GABA) A receptor, subunit beta 1	459	0.35	1	14 +/- 11	12 +/- 11
scl24607.15_131	Dvl1	ENSMUSG00000029071	dishevelled, dsh homolog 1 (Drosophila)	459	0.35	1	7 +/- 10	0 +/- 10
scl24014.12.1_0	Zyg11a	ENSMUSG00000034645	zyg-11 family member A, cell cycle regulator	459	0.35	1	11 +/- 10	14 +/- 11
scl54586.6.1_176	Frmpd3	ENSMUSG00000042425	FERM and PDZ domain containing 3	459	0.35	1	11 +/- 11	2 +/- 10
GI_20912520	AU015228	ENSMUSG00000074804	expressed sequence AU015228	459	0.35	1	17 +/- 12	4 +/- 10
scl29869.6.1_197	Reg3a	ENSMUSG00000079516	regenerating islet-derived 3 alpha	459	0.35	1	7 +/- 10	1 +/- 10
ri|E330019I03|PX00211P06|AK054364|1611	AK054364	NA	NA	459	0.35	1	5 +/- 10	3 +/- 10
scl0064580.2_146	Ndst4	ENSMUSG00000027971	N-deacetylase/N-sulfotransferase (heparin glucosaminyl) 4	459	0.35	1	3 +/- 10	0 +/- 10
scl00102747.2_1	Lrrc49	ENSMUSG00000047766	leucine rich repeat containing 49	459	0.35	1	3 +/- 9	49 +/- 12
scl54380.27_223	Cask	ENSMUSG00000031012	calcium/calmodulin-dependent serine protein kinase (MAGUK family)	459	0.35	1	4 +/- 10	0 +/- 10
scl27701.21_88	Kit	ENSMUSG00000005672	kit oncogene	459	0.35	1	3 +/- 10	4 +/- 10
scl0018720.2_261	Pip5k1a	ENSMUSG00000028126	phosphatidylinositol-4-phosphate 5-kinase, type 1 alpha	459	0.35	1	3 +/- 10	9 +/- 10
scl016974.1_230	Lrp6	ENSMUSG00000030201	low density lipoprotein receptor-related protein 6	459	0.35	1	1 +/- 7	55 +/- 9
scl34686.15_590	Slc5a5	ENSMUSG00000000792	solute carrier family 5 (sodium iodide symporter), member 5	459	0.35	1	1 +/- 7	75 +/- 11
scl51357.6.1_32	Pcyox1l	ENSMUSG00000024579	prenylcysteine oxidase 1 like	459	0.36	1	2 +/- 8	70 +/- 12
GI_23943921	Hist1h4h	ENSMUSG00000060981	histone cluster 1, H4h	459	0.36	1	10 +/- 11	31 +/- 12
scl0099311.1_306	Commd7	ENSMUSG00000056941	COMM domain containing 7	459	0.36	1	4 +/- 9	25 +/- 12
ri|5830406N04|PX00038B19|AK030800|3703	Lrrcc1	ENSMUSG00000027550	leucine rich repeat and coiled-coil domain containing 1	459	0.36	1	14 +/- 11	23 +/- 12
scl38213.31_299	Stxbp5	ENSMUSG00000019790	syntaxin binding protein 5 (tomosyn)	459	0.36	1	3 +/- 9	29 +/- 12
scl28385.5_137	Ccnd2	ENSMUSG00000000184	cyclin D2	459	0.36	1	4 +/- 9	40 +/- 12
scl42009.20.1_59	Brf1	ENSMUSG00000011158	BRF1 homolog, subunit of RNA polymerase III transcription initiation factor IIIB (S. cerevisiae)	459	0.36	1	13 +/- 11	27 +/- 12
scl0002856.1_27	Cort	ENSMUSG00000028971	cortistatin	459	0.36	1	3 +/- 10	6 +/- 10
scl00232087.1_95	Mat2a	ENSMUSG00000053907	methionine adenosyltransferase II, alpha	459	0.36	1	16 +/- 12	19 +/- 11
scl0003716.1_62	Ercc8	ENSMUSG00000021694	excision repaiross-complementing rodent repair deficiency, complementation group 8	459	0.36	1	4 +/- 9	19 +/- 12
GI_38075070	Ncf2	ENSMUSG00000026480	neutrophil cytosolic factor 2	459	0.36	1	4 +/- 9	17 +/- 12
scl48147.6_538	Prdm15	ENSMUSG00000014039	PR domain containing 15	459	0.36	1	18 +/- 12	7 +/- 10
scl44144.1_24	AK054386	NA	NA	459	0.36	1	5 +/- 9	19 +/- 11
scl28793.10_326	Stambp	ENSMUSG00000006906	STAM binding protein	459	0.36	1	9 +/- 10	18 +/- 11
ri|B130047N10|PX00158B14|AK045211|3161	Ube3c	ENSMUSG00000039000	ubiquitin protein ligase E3C	459	0.36	1	12 +/- 11	3 +/- 10
scl32699.8.1_168	Rras	ENSMUSG00000038387	Harvey rat sarcoma oncogene, subgroup R	459	0.36	1	10 +/- 11	7 +/- 10
ri|D230021E06|PX00188N14|AK051937|4132	Lpp	ENSMUSG00000033306	LIM domain containing preferred translocation partner in lipoma	459	0.36	1	10 +/- 10	21 +/- 12
scl0015530.1_184	Hspg2	ENSMUSG00000028763	perlecan (heparan sulfate proteoglycan 2)	459	0.36	1	7 +/- 9	21 +/- 12
scl41684.10_411	Gabrb2	ENSMUSG00000007653	gamma-aminobutyric acid (GABA) A receptor, subunit beta 2	459	0.36	1	6 +/- 9	18 +/- 12
scl41183.17_270	DQ551402	NA	NA	459	0.36	1	15 +/- 11	12 +/- 11
scl0001218.1_87	Csda	NA	NA	459	0.36	1	4 +/- 9	15 +/- 11
[truncated: 13,738 more rows]
